# Supplementary material
Source: PubMed Central journal article supplement (PMC3496400)
Supplement: NIHMS416398-supplement-1.pdf [file NIHMS416398-supplement-1.pdf]

## Supporting Information

### Structure-Based Virtual Screening of Small-Molecule Antagonists of Platelet Integrin $\alpha\text{IIb}\beta\text{3}$ that Do Not Prime the Receptor to Bind Ligand

Ana Negri, Jihong Li, Sarasija Naini, Barry S. Coller, and Marta Filizola

#### Contents:

|                                                           |          |
|-----------------------------------------------------------|----------|
| Table S1.....                                             | S2-S64   |
| Table S2.....                                             | S65-S127 |
| Figure S1.....                                            | S128     |
| Figure S2.....                                            | S129     |
| Script to calculate Tanimoto similarity coefficients..... | S130     |

Table S1

| RANK | Structure                                          | ZINC      | RANK | Structure                      | ZINC      |
|------|----------------------------------------------------|-----------|------|--------------------------------|-----------|
| 1    | <p>Chiral</p> <p>C13727245</p>                     | C13727245 | 2    | <p>Chiral</p> <p>C13727253</p> | C13727253 |
| 3    | <p>H</p> <p>Chiral</p> <p>C35483153</p> <p>H</p>   | C35483153 | 4    | <p>C20799873</p>               | C20799873 |
| 5    | <p>Chiral</p> <p>C13727248</p>                     | C13727248 | 6    | <p>C00001763</p>               | C00001763 |
| 7    | <p>H H</p> <p>Chiral</p> <p>C32051969</p> <p>H</p> | C32051969 | 8    | <p>Chiral</p> <p>C05394736</p> | C05394736 |

9

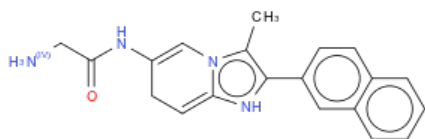

C31958844

10

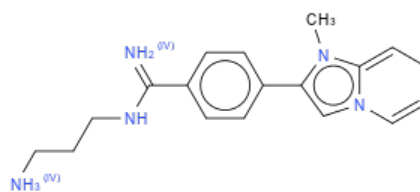

C04671295

11

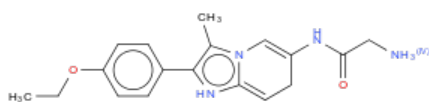

C31958866

12

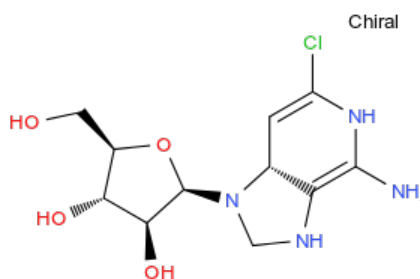

C16980937

13

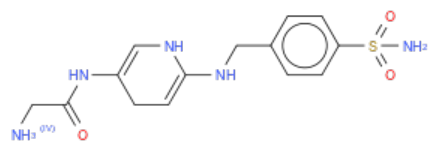

C31961318

14

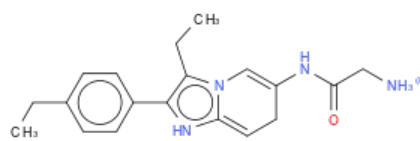

C31958834

15

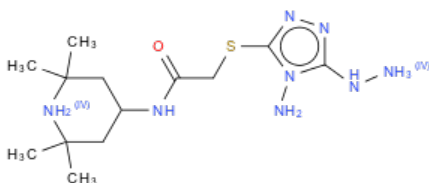

C20922500

16

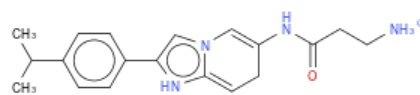

C31958792

17

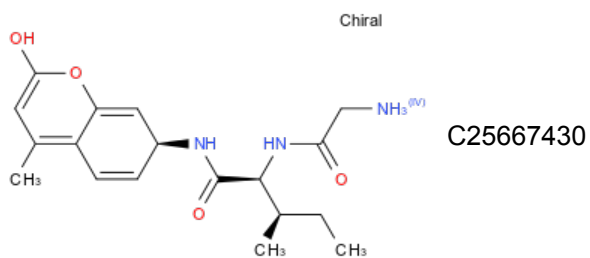

18

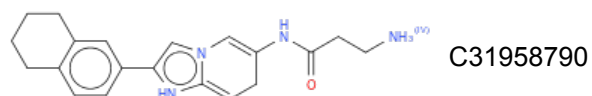

19

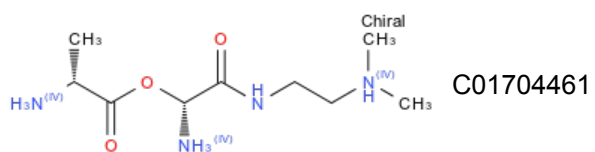

20

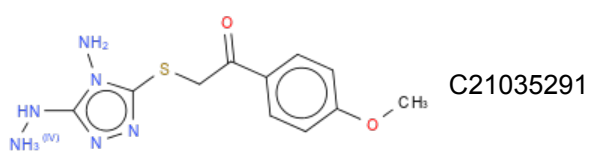

21

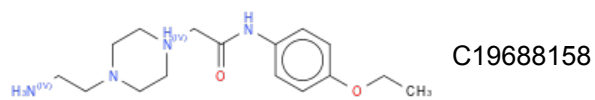

22

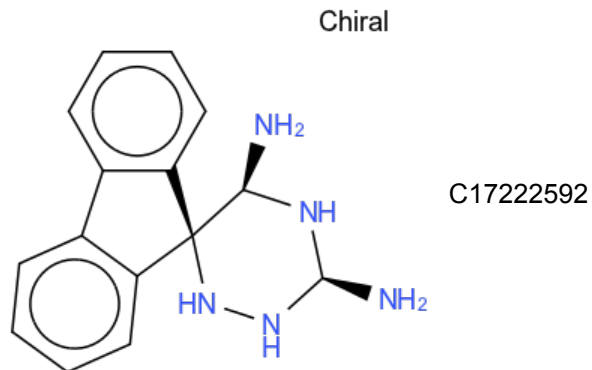

23

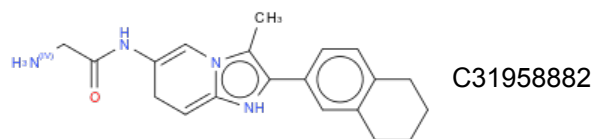

24

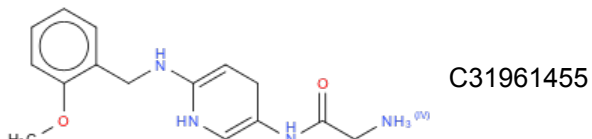

25

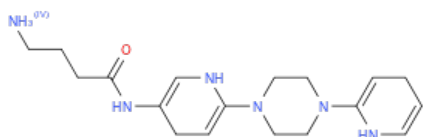

C31962462

26

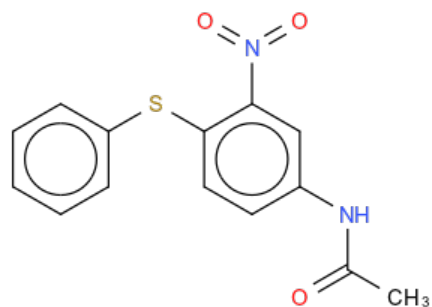

C16124391

27

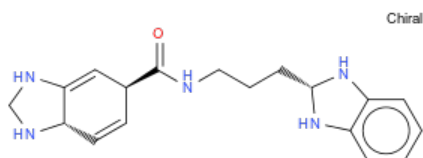

C11484801

28

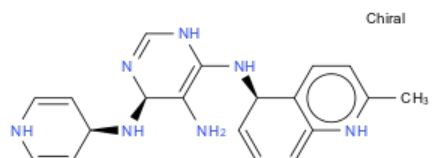

C40687701

29

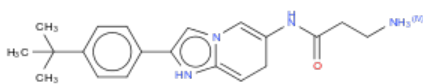

C31958780

30

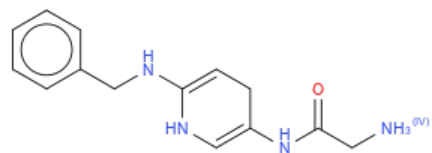

C31961369

31

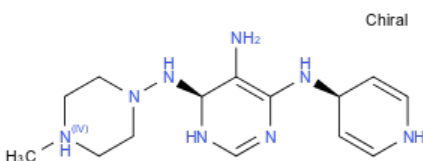

C40687561

32

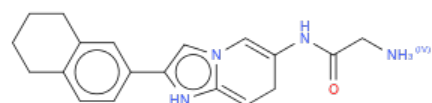

C31958942

33

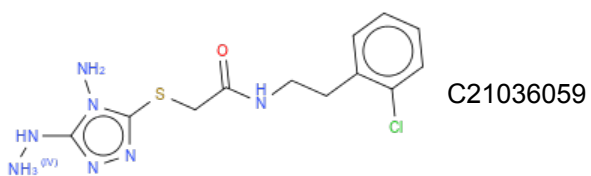

34

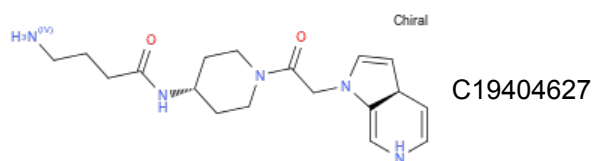

35

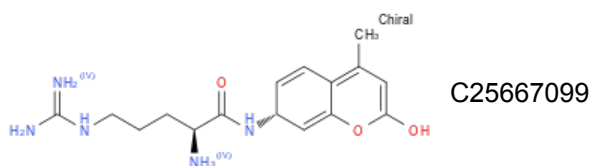

36

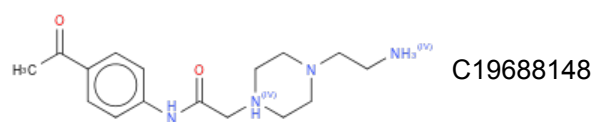

37

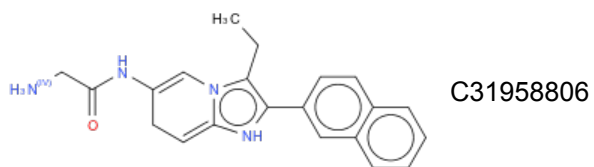

38

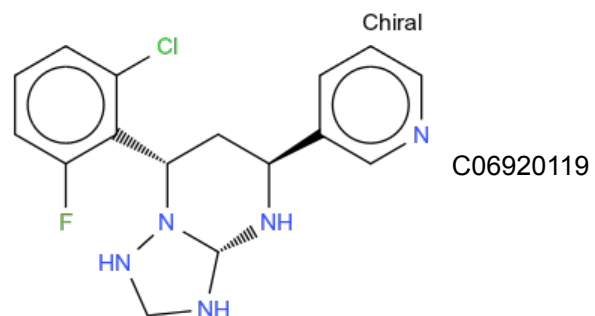

39

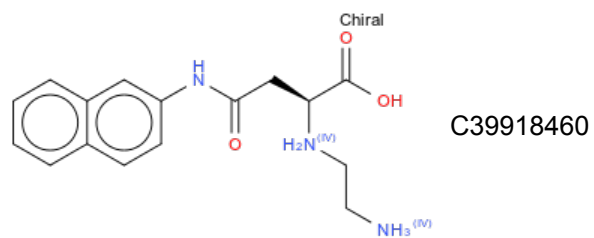

40

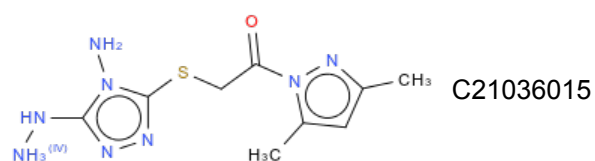

41

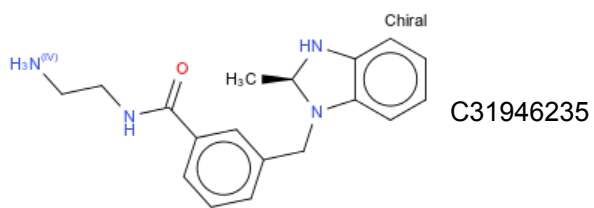

42

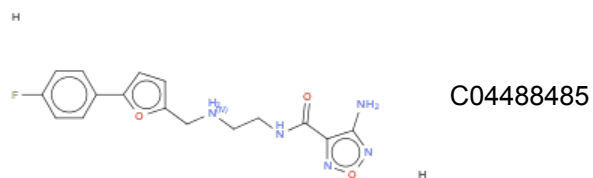

43

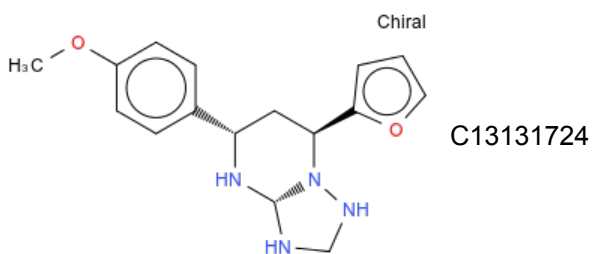

44

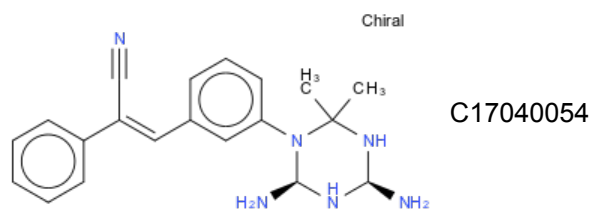

45

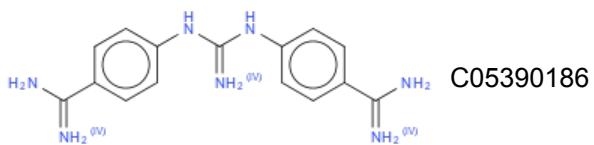

46

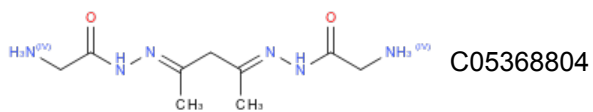

47

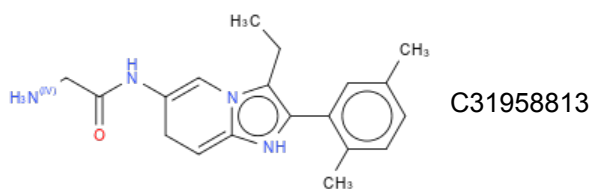

48

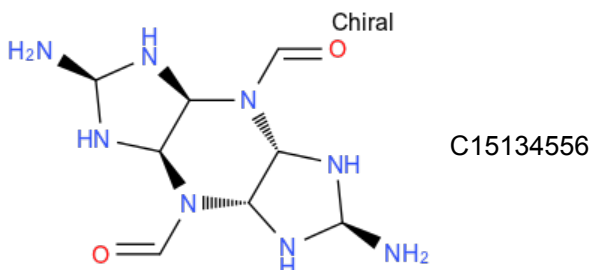

49

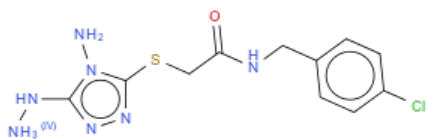

C21035775

50

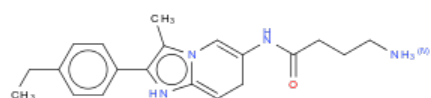

C31958702

51

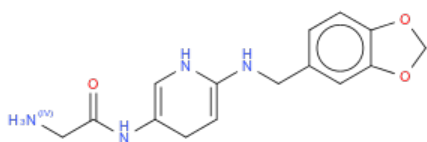

C31961448

52

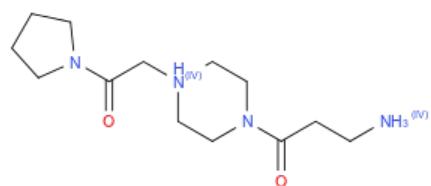

C19687999

53

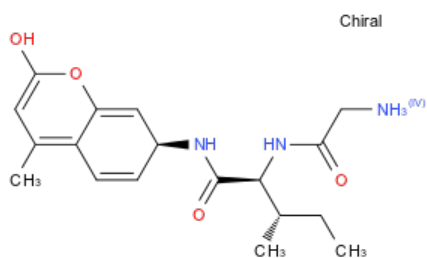

C25667437

54

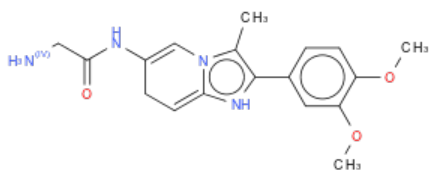

C31958875

55

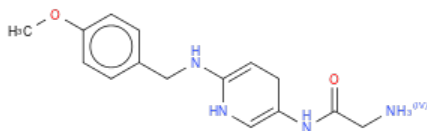

C31961432

56

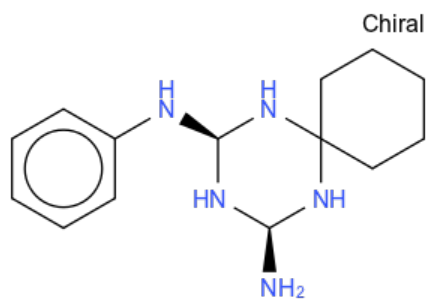

C03886786



57

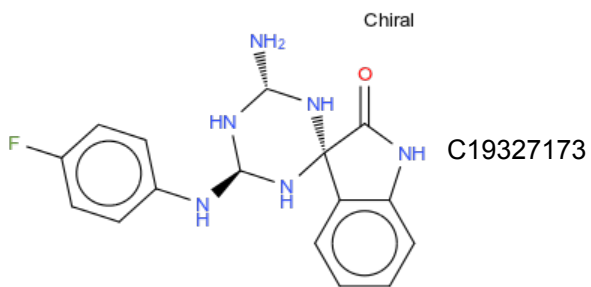

58

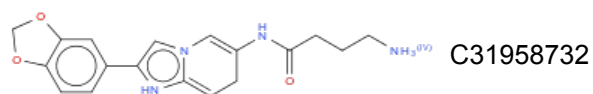

59

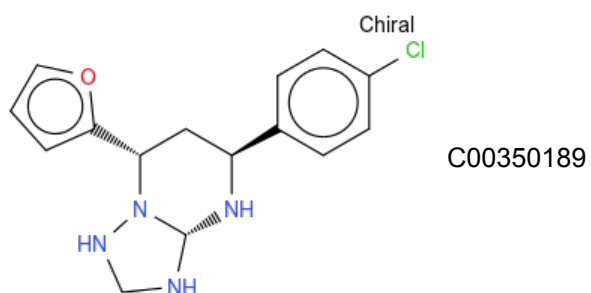

60

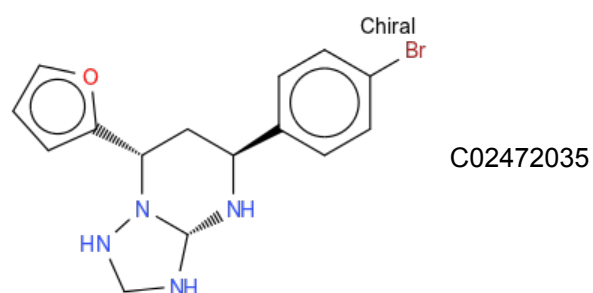

61

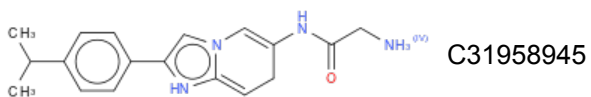

62

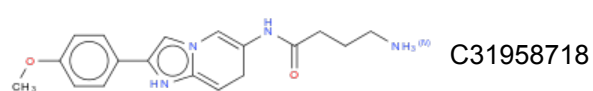

63

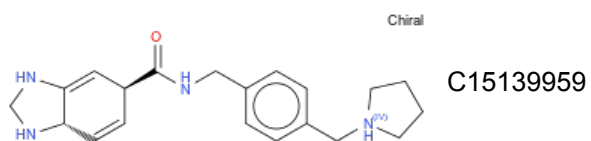

64

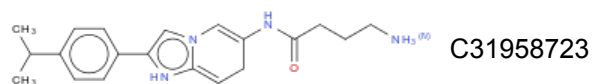

65

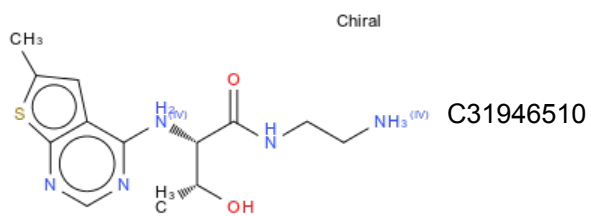

66

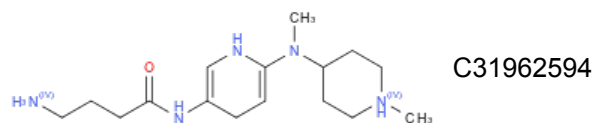

67

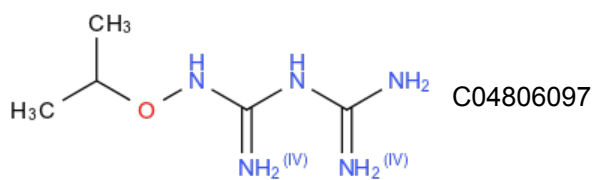

68

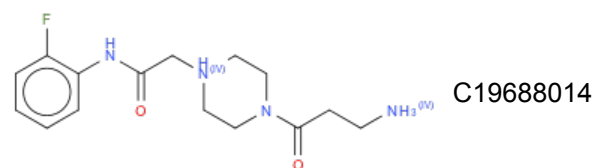

69

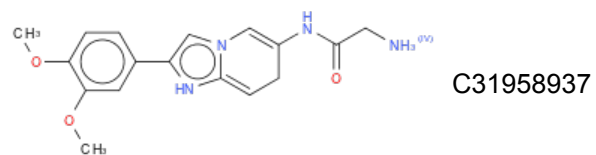

70

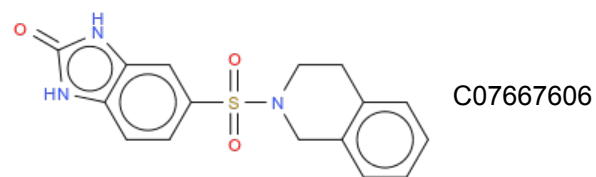

71

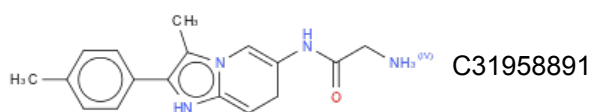

72

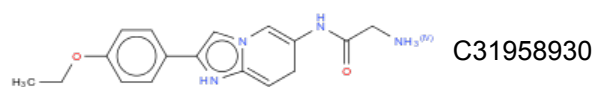

73

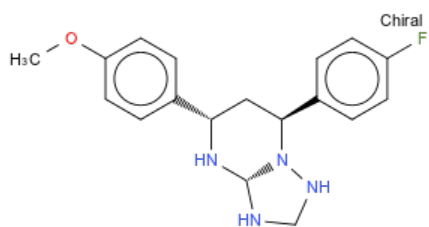

C00222032

74

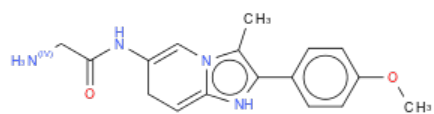

C31958871

75

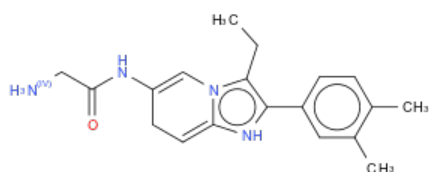

C31958828

76

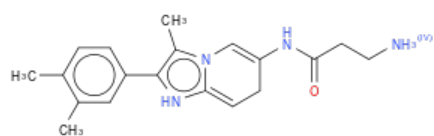

C31958761

77

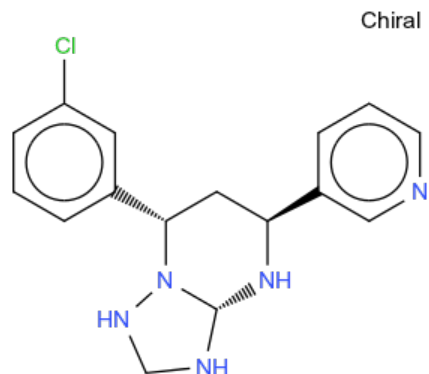

C00221869

78

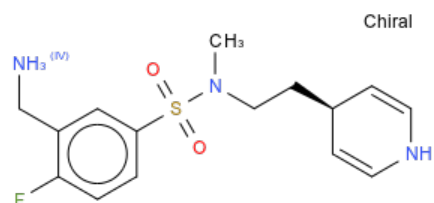

C20189171

79

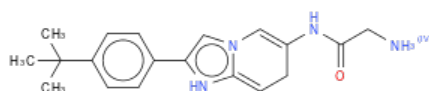

C31958927

80

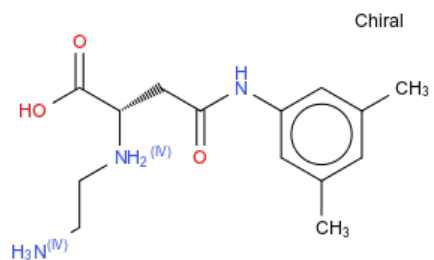

C33490240

81

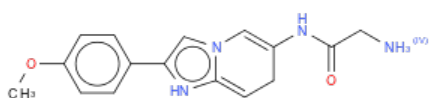

C31958934

82

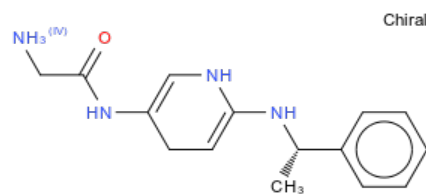

C31961471

83

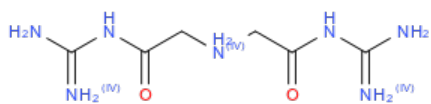

C34772573

84

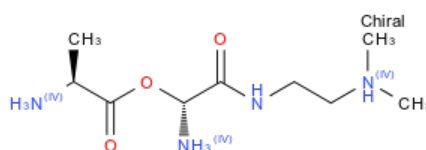

C01704460

85

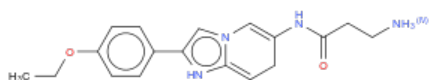

C31958783

86

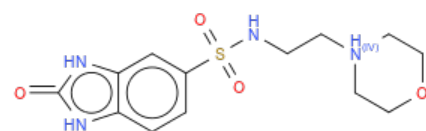

C19201533

87

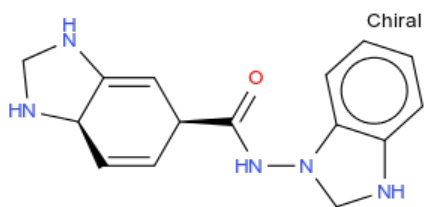

C09218525

88

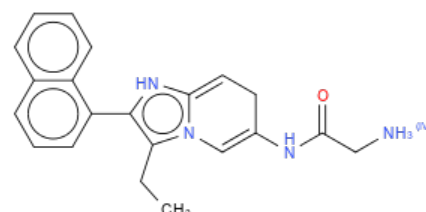

C31958809

89

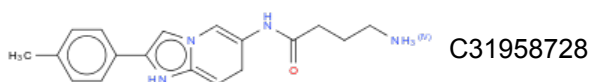

90

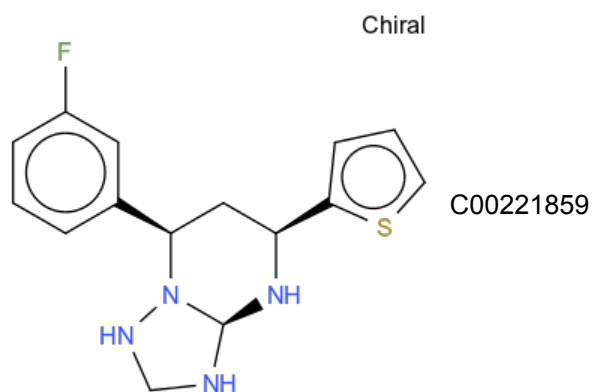

91

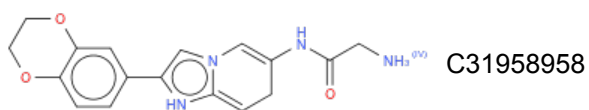

92

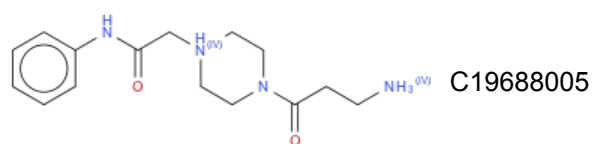

93

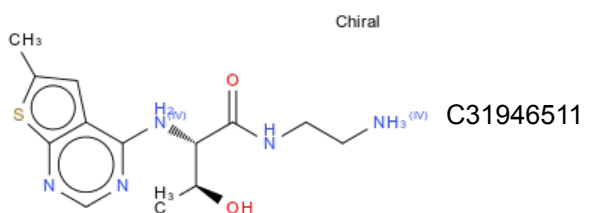

94

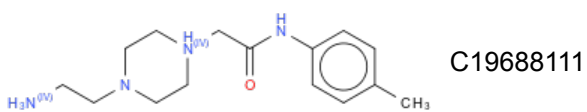

95

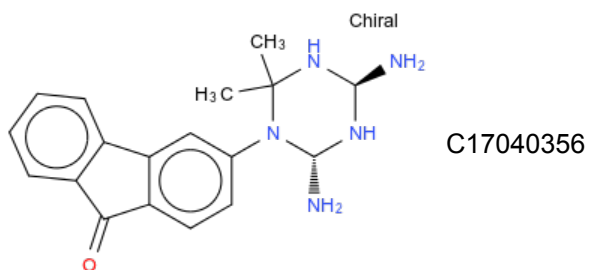

96

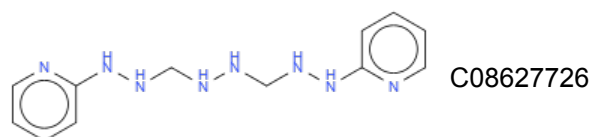

97

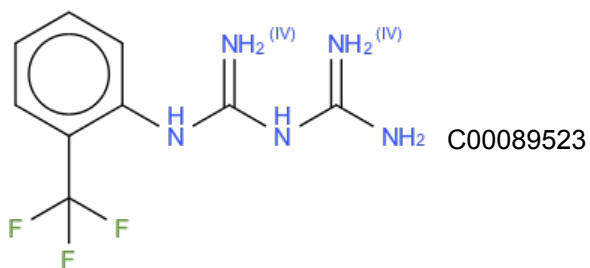

98

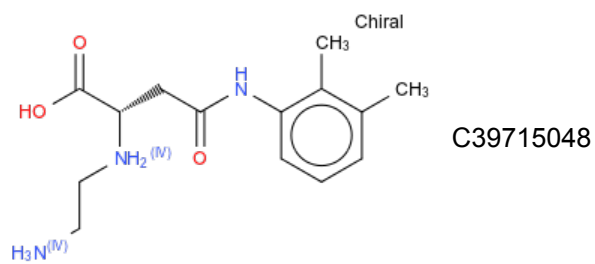

99

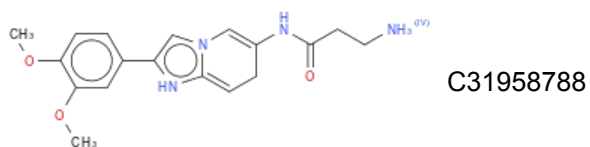

100

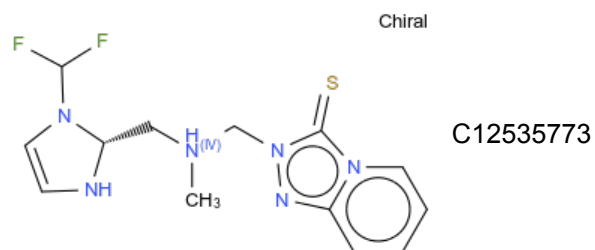

101

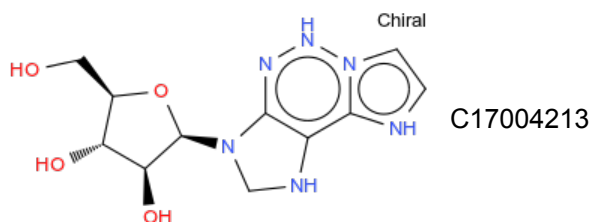

102

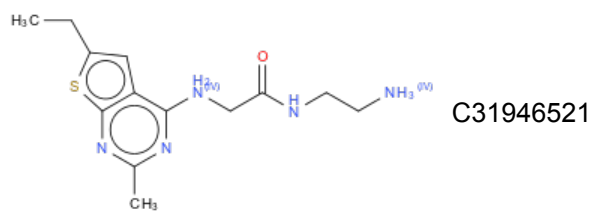

103

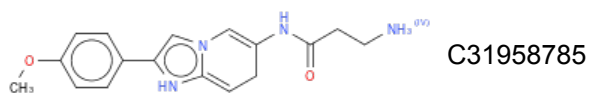

104

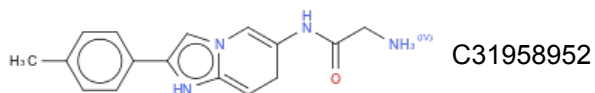

105

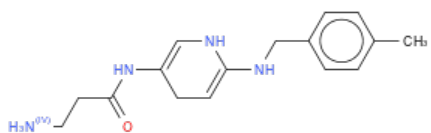

C31961210

106

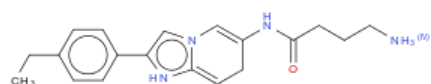

C31958726

107

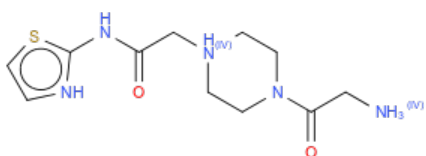

C19687566

108

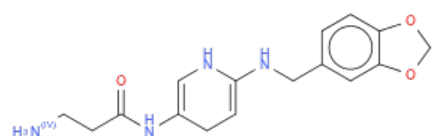

C31961212

109

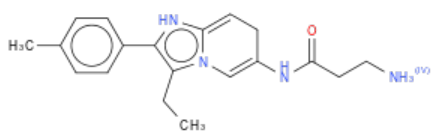

C31958745

110

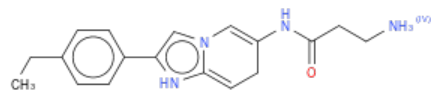

C31958794

111

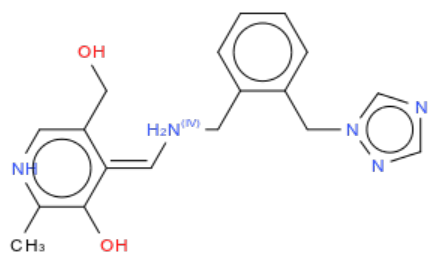

C31854712

112

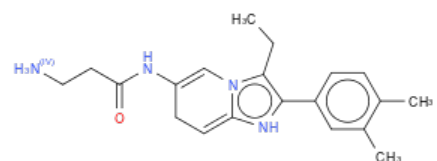

C31958740

113

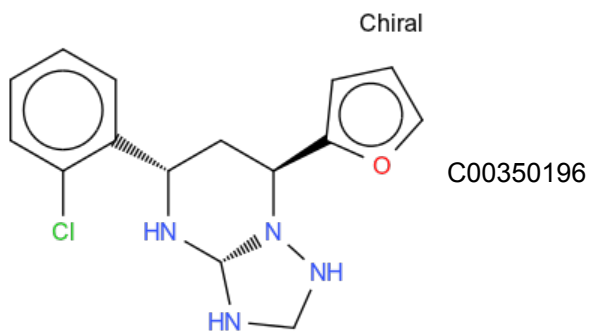

114

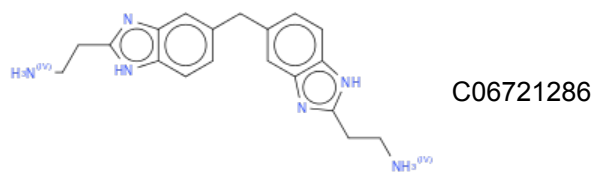

115

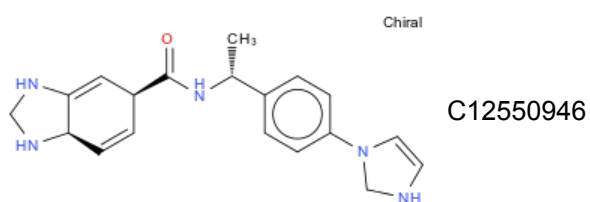

116

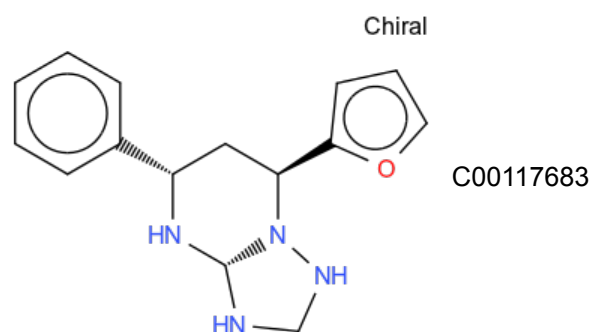

117

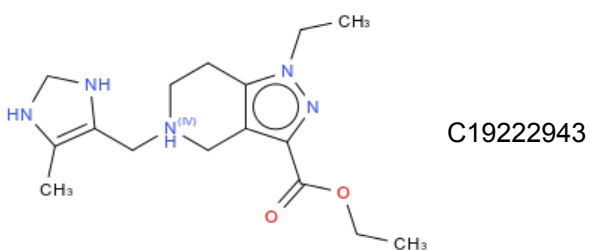

118

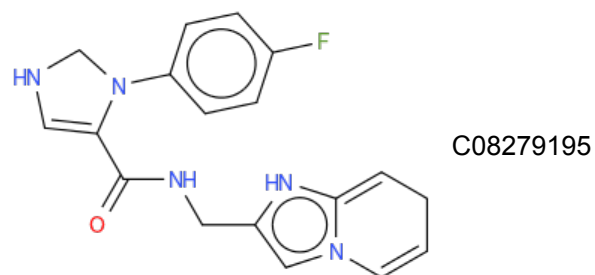

119

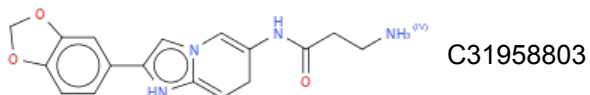

120

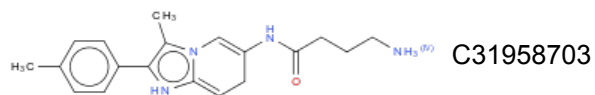



121

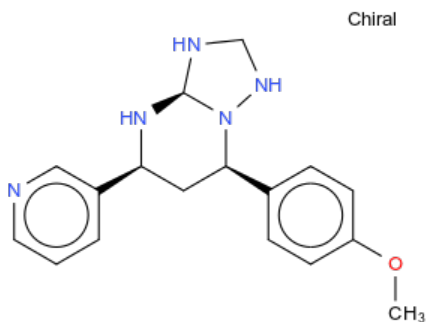

122

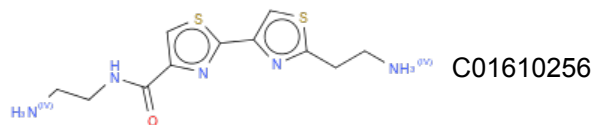

123

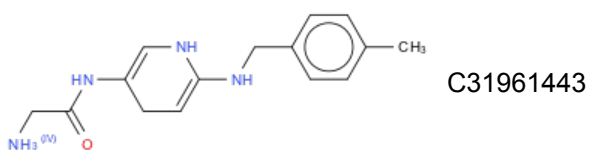

124

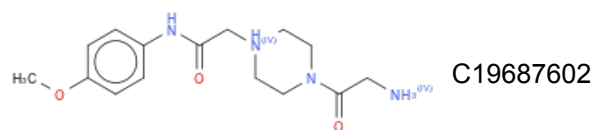

125

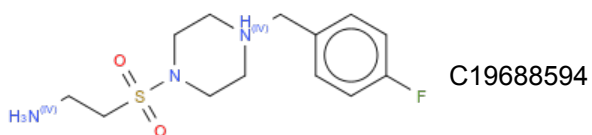

126

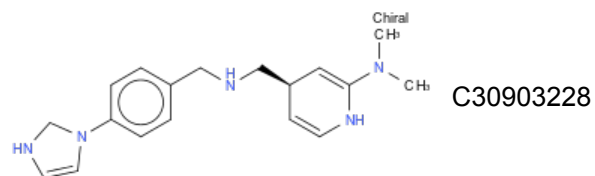

127

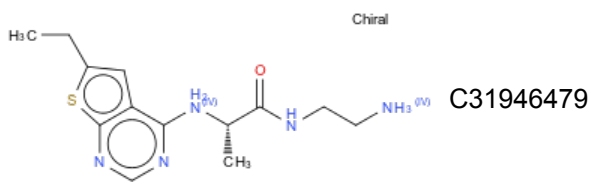

128

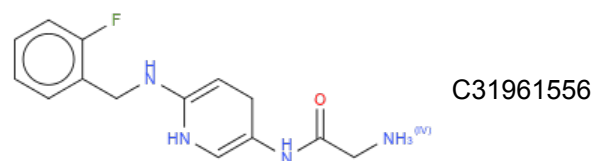

129

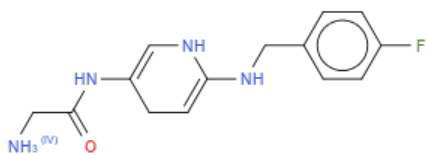

C31961437

130

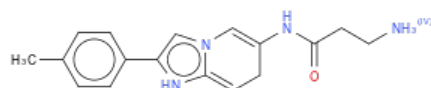

C31958797

131

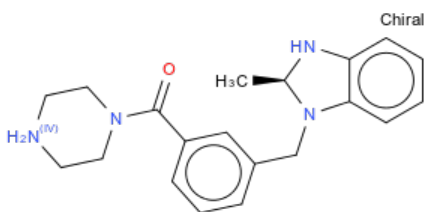

C31946234

132

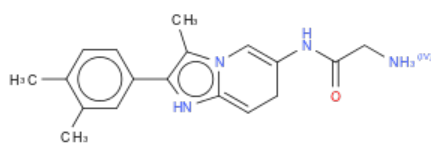

C31958879

133

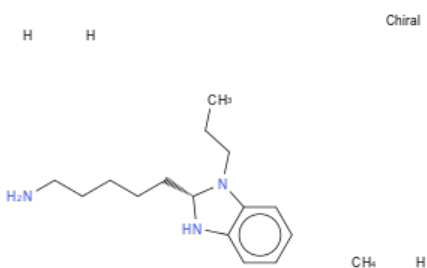

C19734673

134

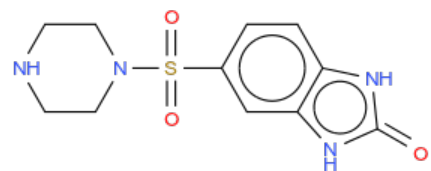

C34781275

135

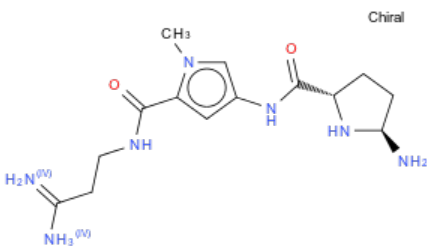

C17190990

136

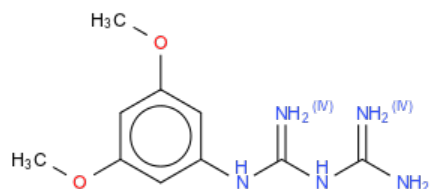

C00089503

137

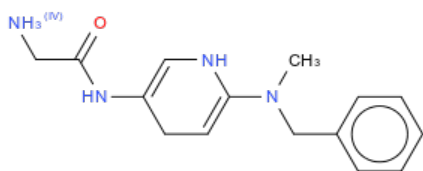

C31962877

138

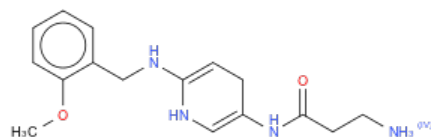

C31961215

139

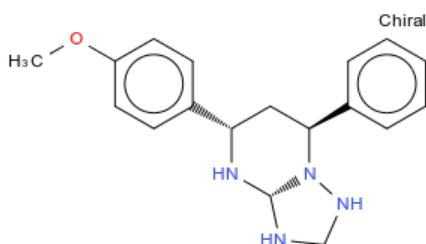

C00205862

140

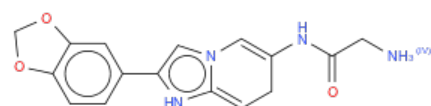

C31958983

141

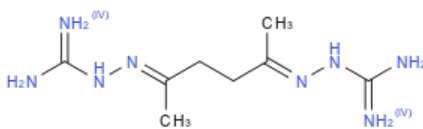

C08622516

142

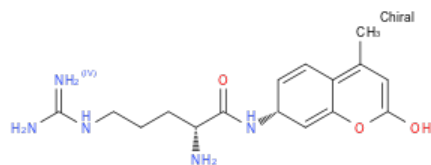

C25667105

143

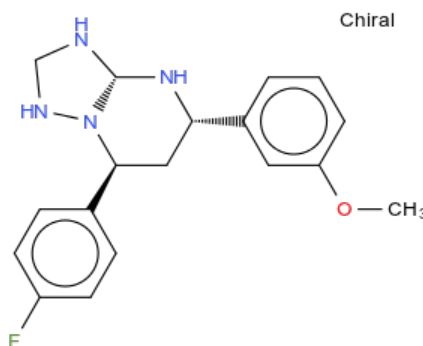

C00532288

144

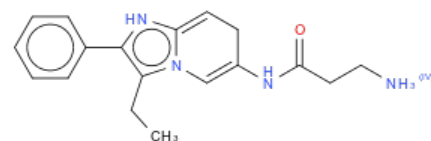

C31958746

145

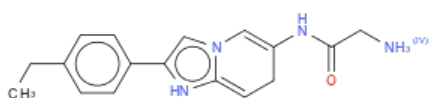

C31958949

146

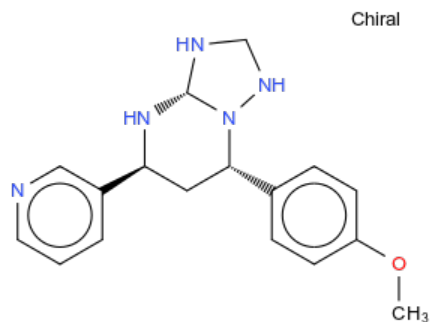

C00221723

147

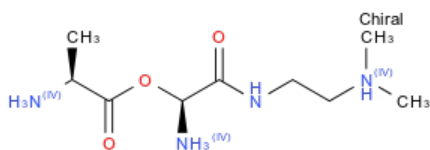

C01704458

148

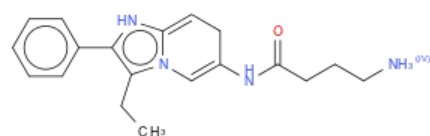

C31958692

149

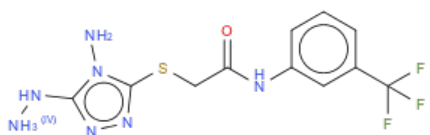

C21036212

150

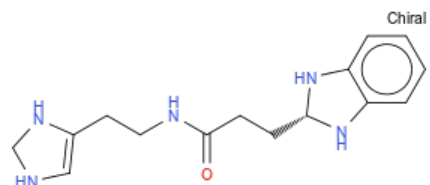

C13626789

151

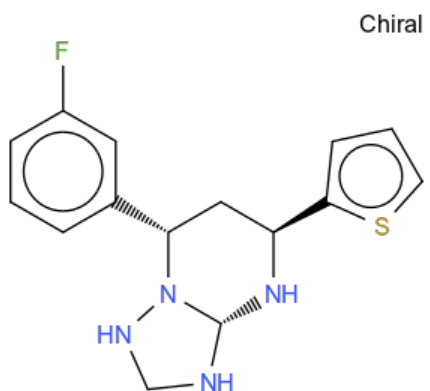

C00221862

152

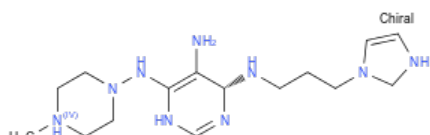

C40757049

153

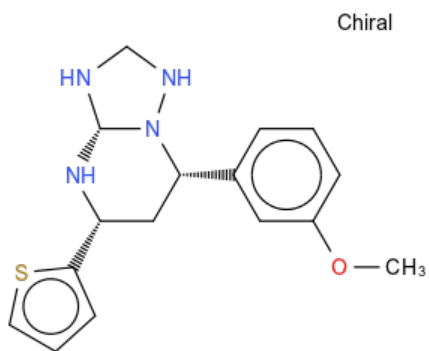

154

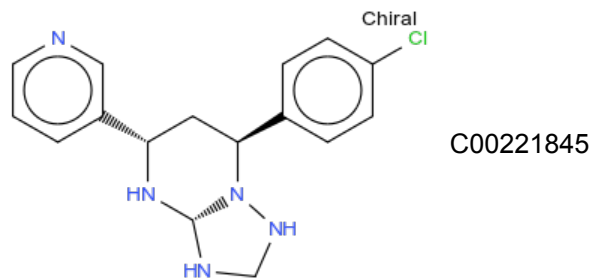

155

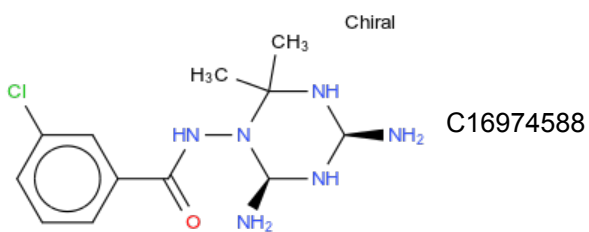

156

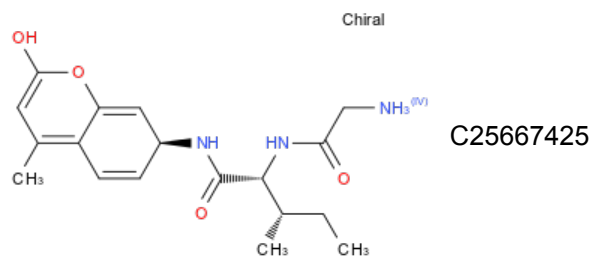

157

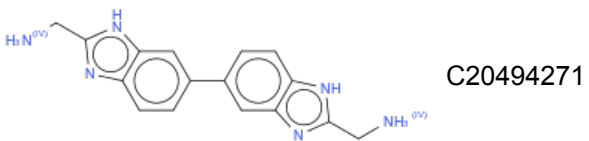

158

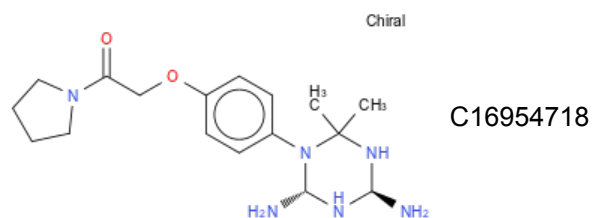

159

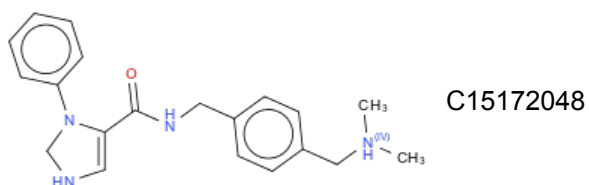

160

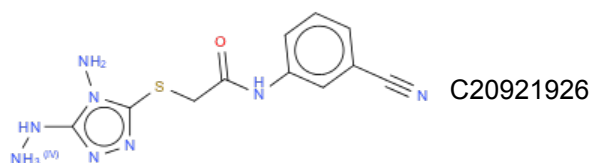

161

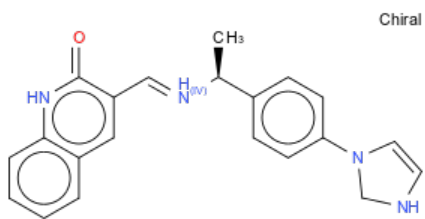

C27062276

162

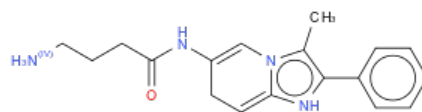

C31958706

163

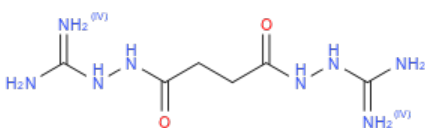

C04159326

164

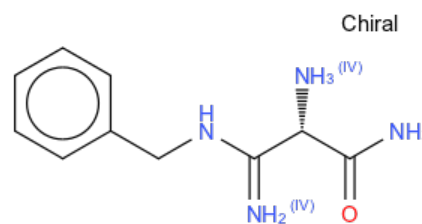

C08652294

165

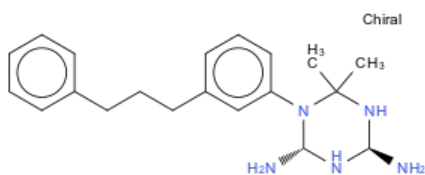

C17039527

166

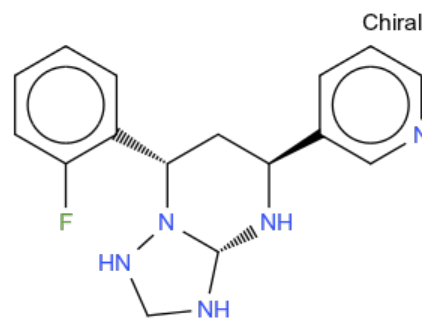

C00221750

167

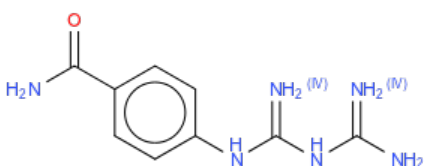

C04365651

168

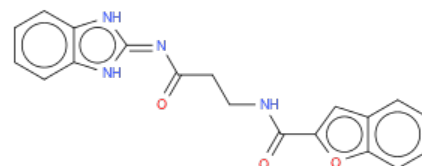

C20745140

169

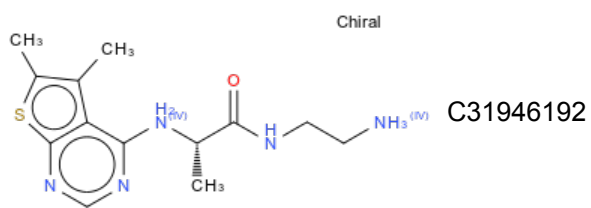

170

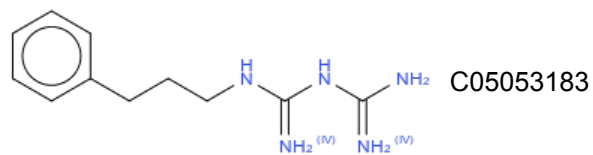

171

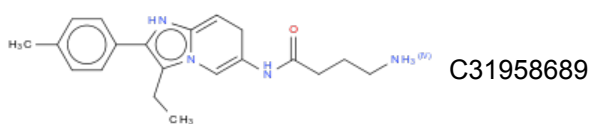

172

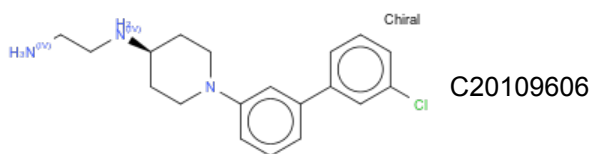

173

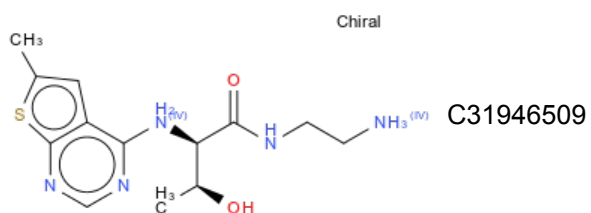

174

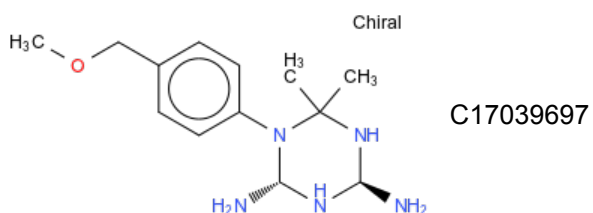

175

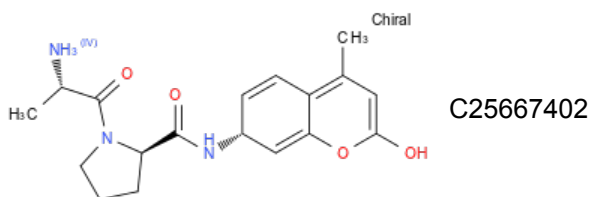

176

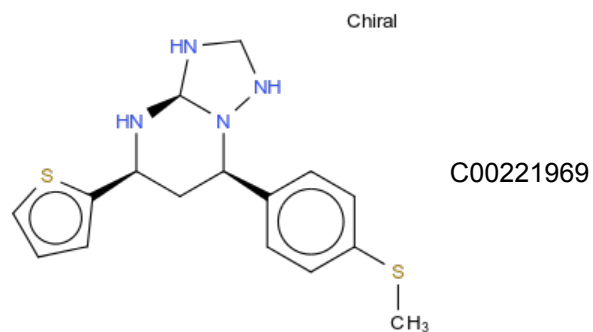





185

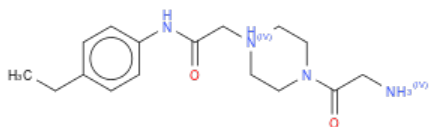

C19687588

186

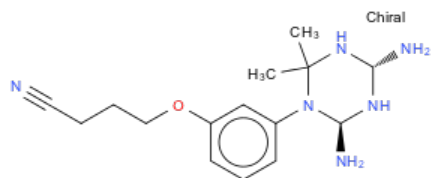

C17039879

187

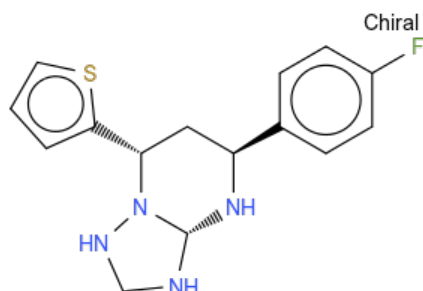

C00221834

188

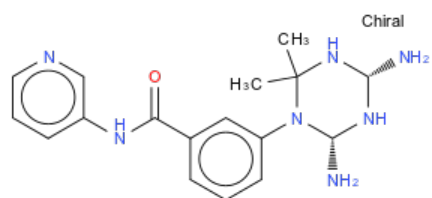

C08627943

189

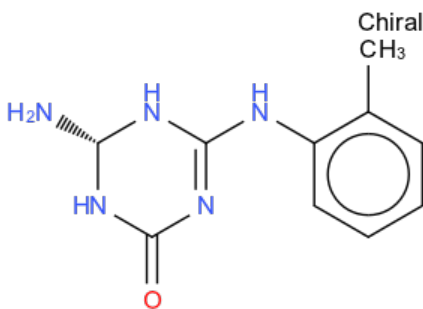

C04670667

190

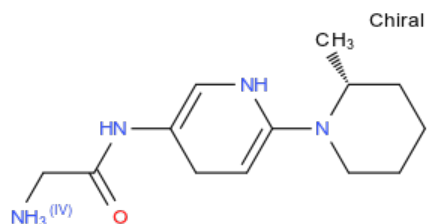

C31962858

191

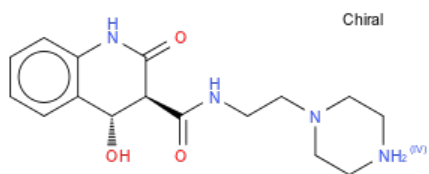

C19972640

192

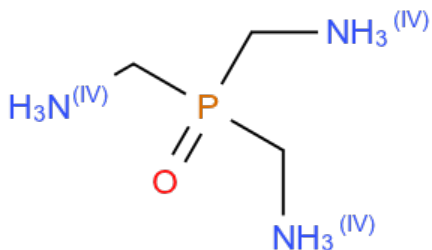

C01871645

193

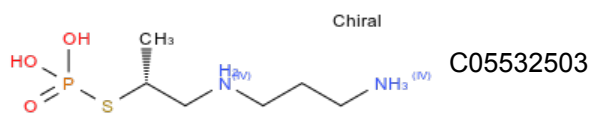

194

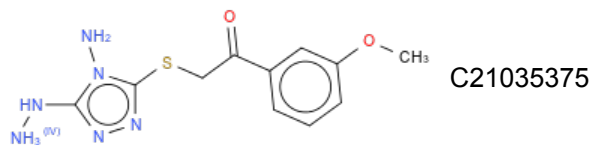

195

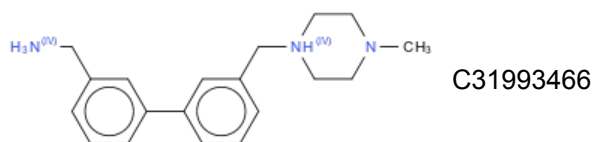

196

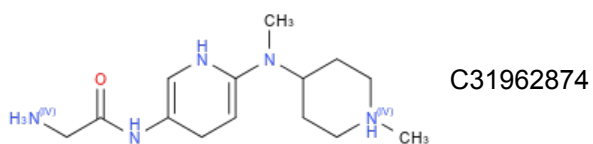

197

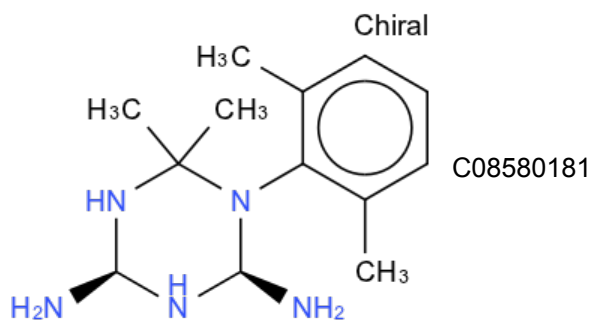

198

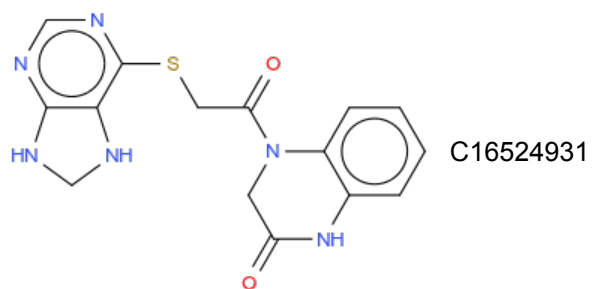

199

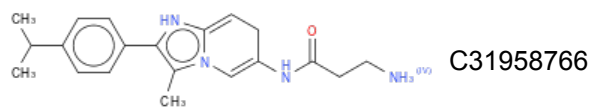

200

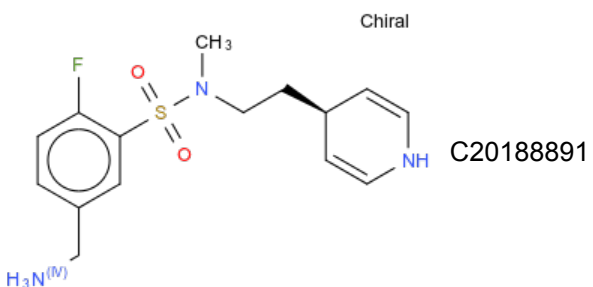

201

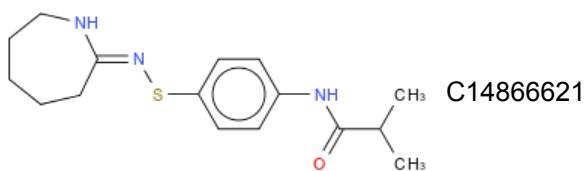

202

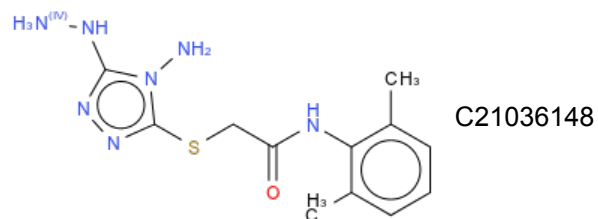

203

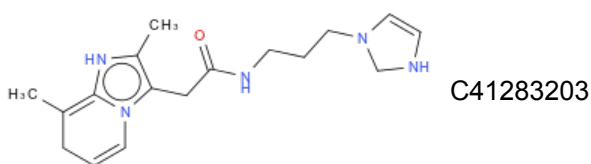

204

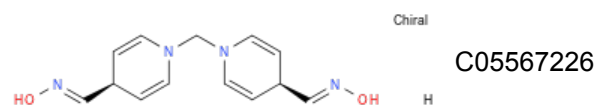

205

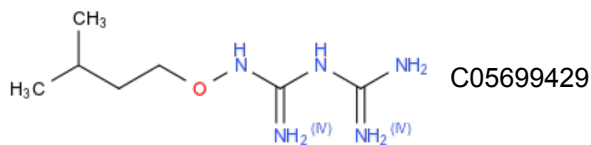

206

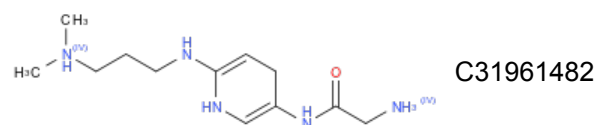

207

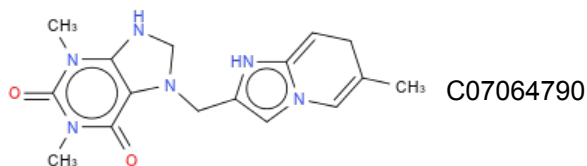

208

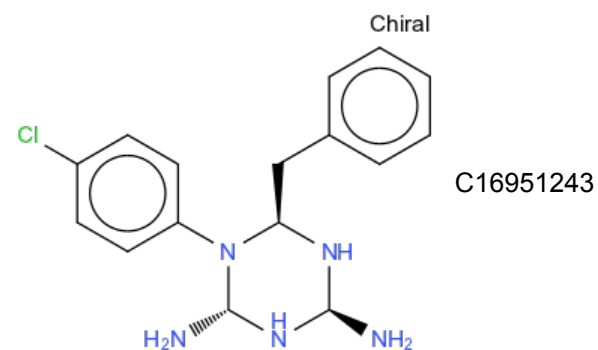

209

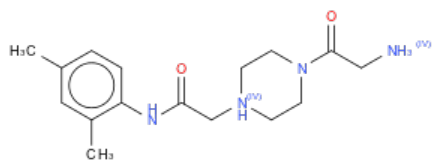

C19687592

210

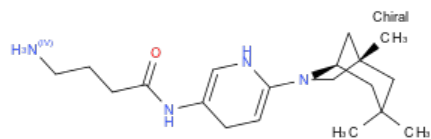

C31962623

211

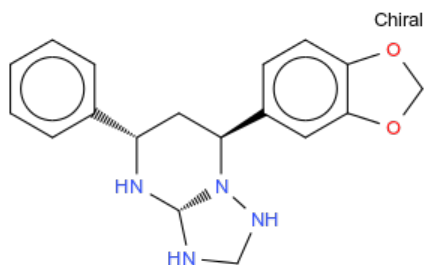

C03055209

212

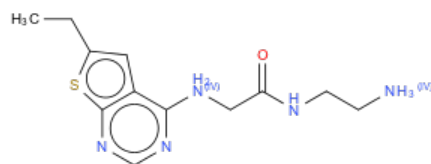

C31946476

213

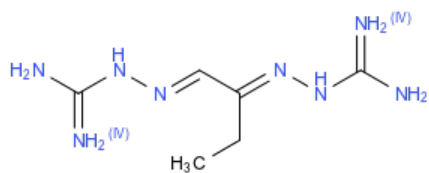

C13533723

214

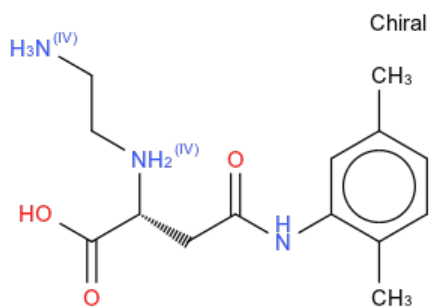

C32573515

215

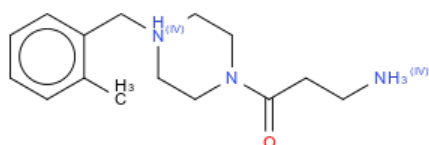

C19687972

216

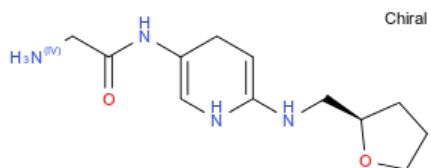

C31961424

217

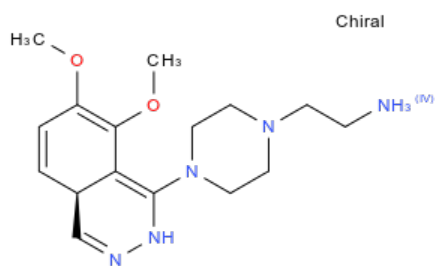

C26466267

218

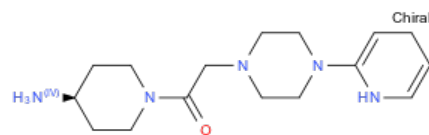

C32074143

219

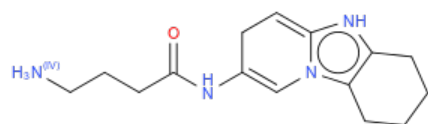

C31958713

220

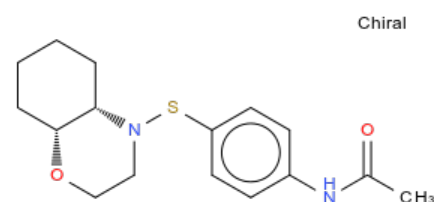

C04261532

221

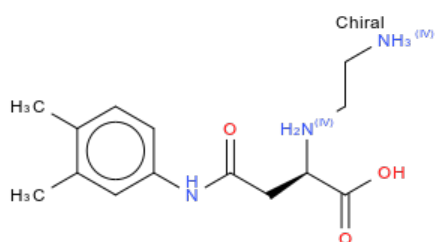

C39715053

222

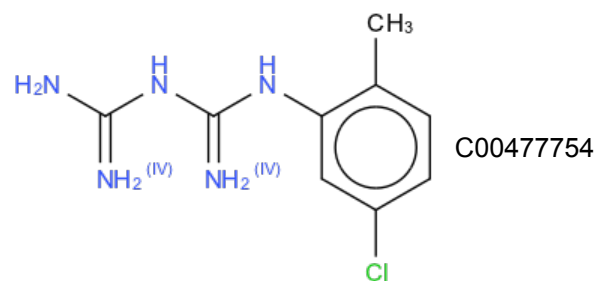

C00477754

223

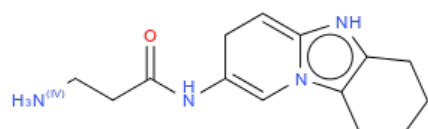

C31958779

224

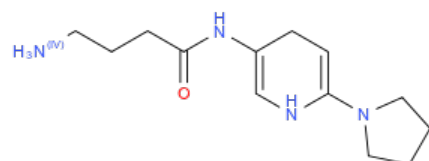

C31962568

225

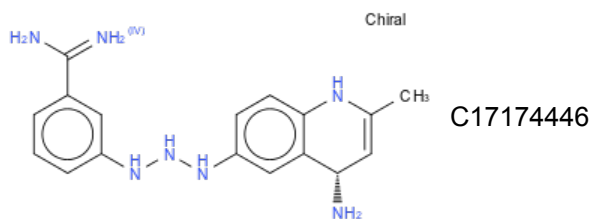

226

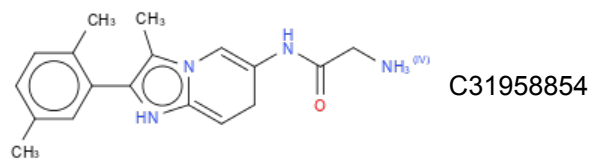

227

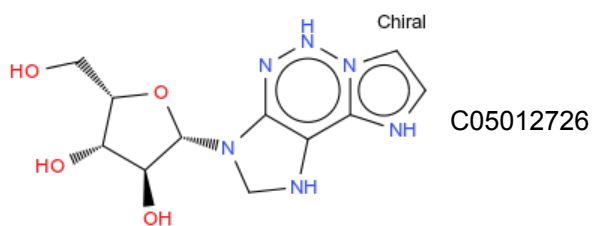

228

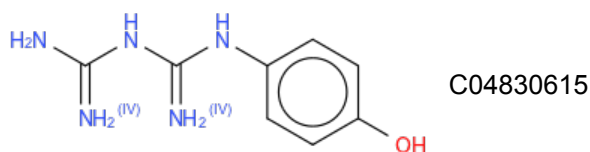

229

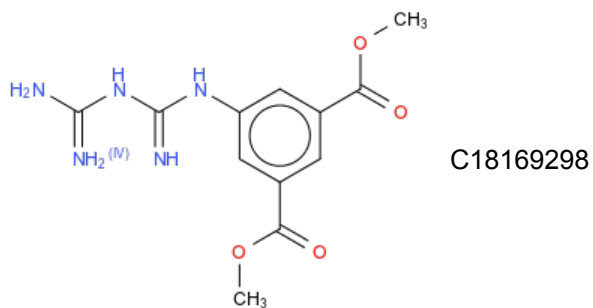

230

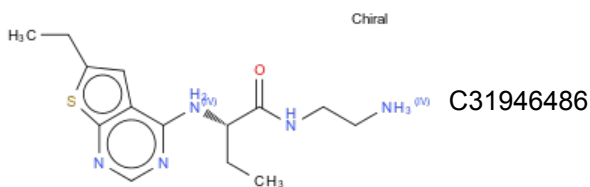

231

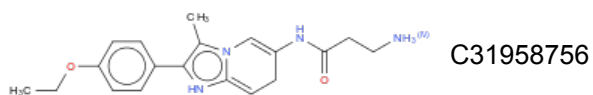

232

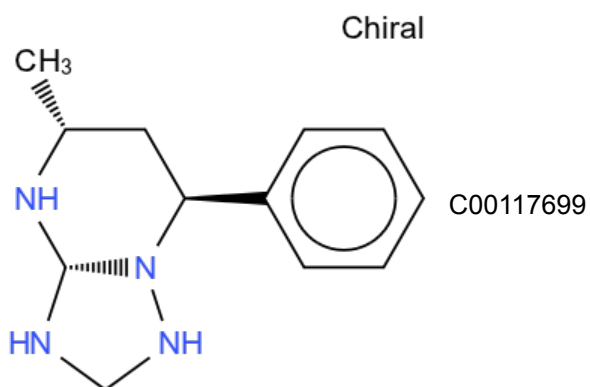

233

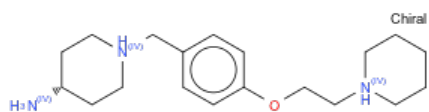

C32072376

234

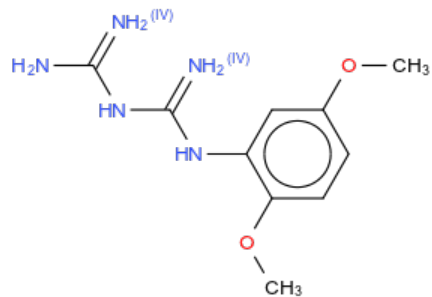

C00528815

235

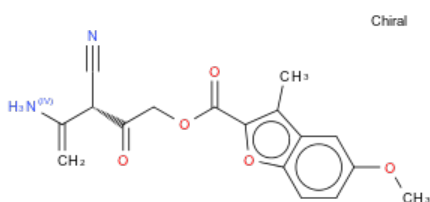

C03303352

236

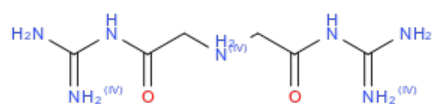

C05368763

237

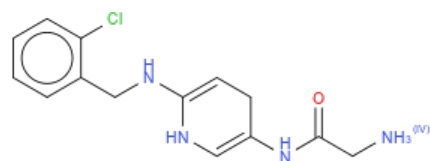

C31961571

238

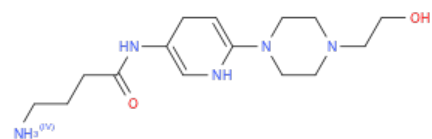

C31962563

239

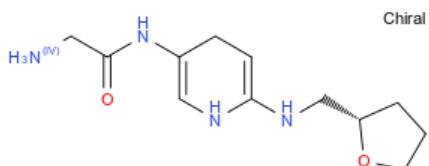

C31961419

240

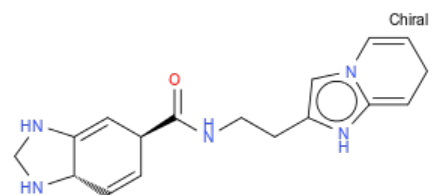

C12666529

241

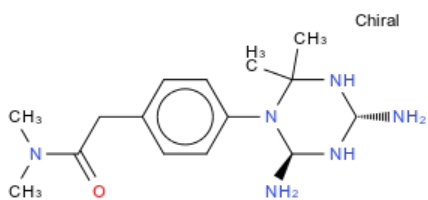

C16954548

242

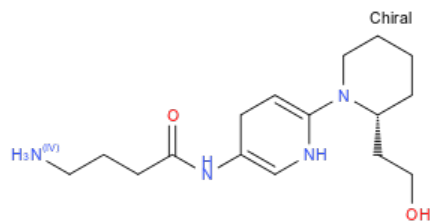

C31962516

243

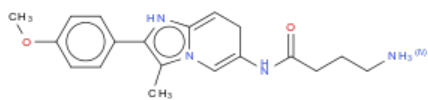

C31958697

244

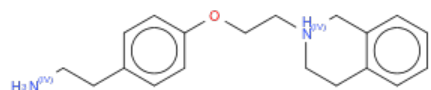

C31978078

245

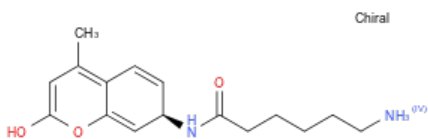

C40844403

246

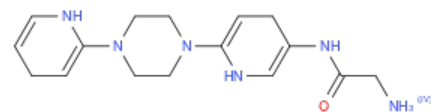

C31962775

247

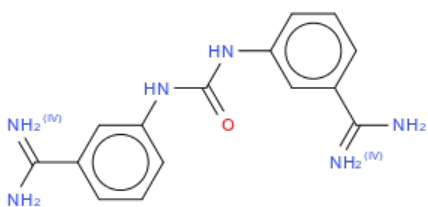

C00031235

248

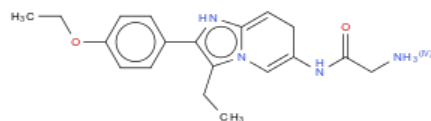

C31958822



249

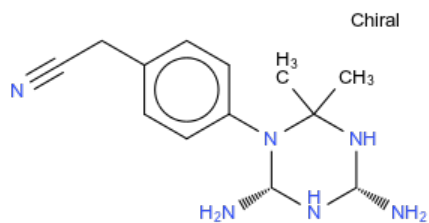

C16954549

250

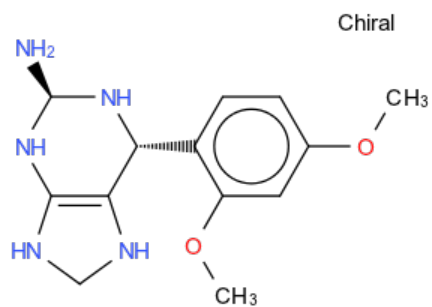

C17109121

251

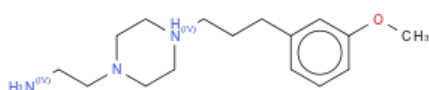

C19933558

252

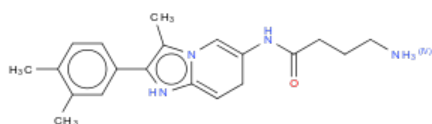

C31958699

253

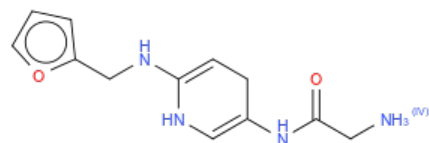

C31961348

254

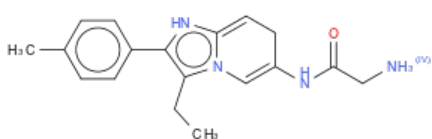

C31958837

255

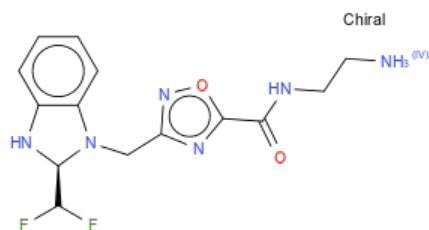

C12398395

256

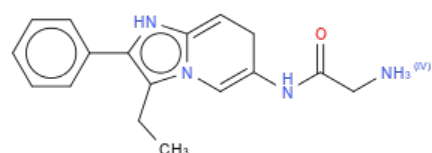

C31958841

257

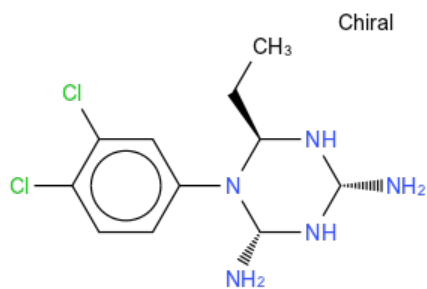

C08581357

258

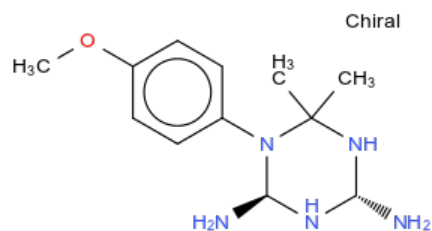

C08581548

259

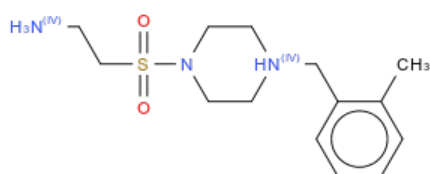

C19688584

260

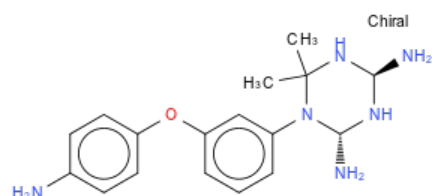

C17039913

261

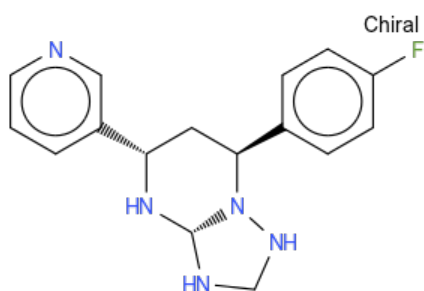

C00221759

262

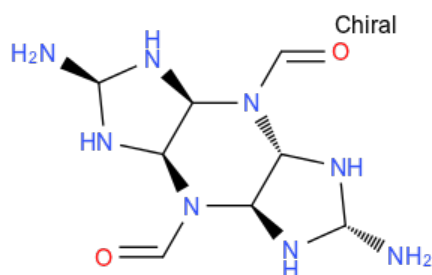

C19805539

263

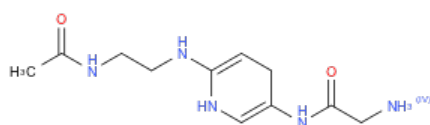

C31961379

264

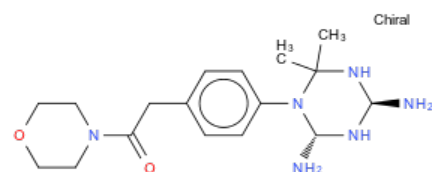

C16954714

265

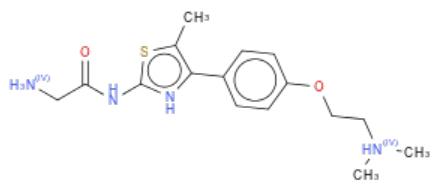

C31959695

266

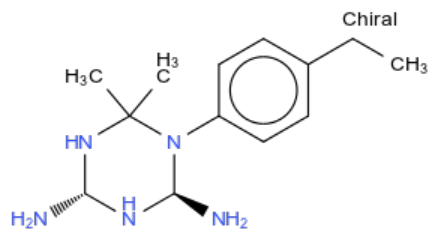

C17039694

267

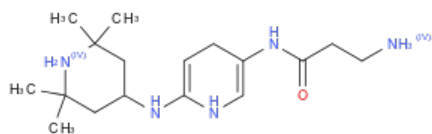

C31961243

268

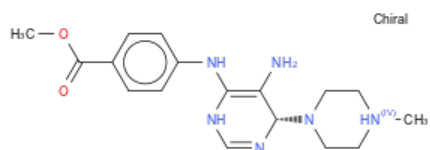

C40726301

269

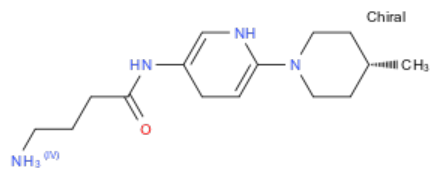

C31962534

270

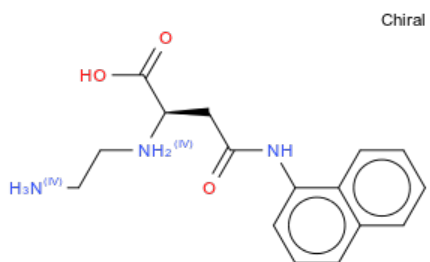

C39715047

271

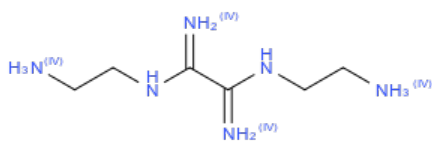

C05187976

272

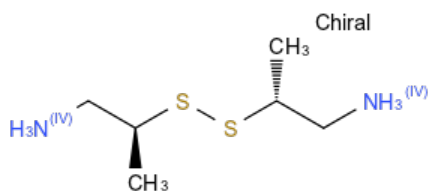

C05515630

273

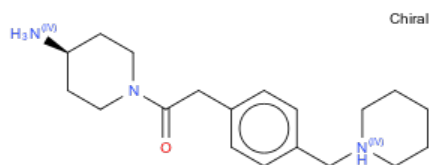

C33456093

274

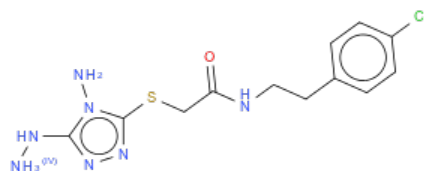

C21036074

275

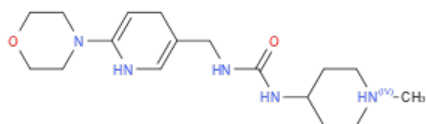

C27337626

276

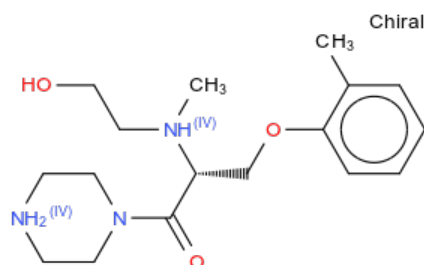

C32086104

277

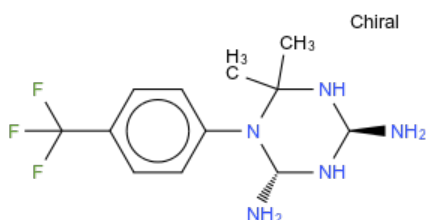

C17039530

278

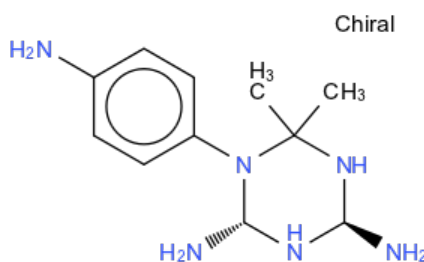

C08627942

279

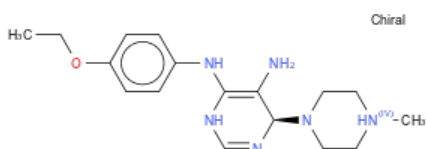

C40726297

280

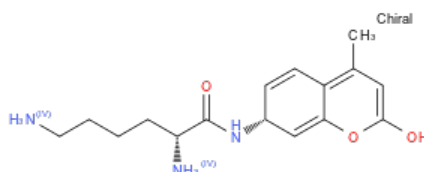

C25667165

281

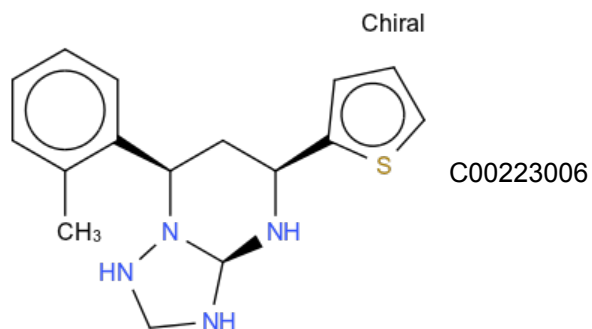

282

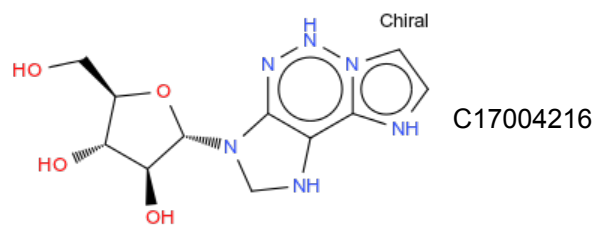

283

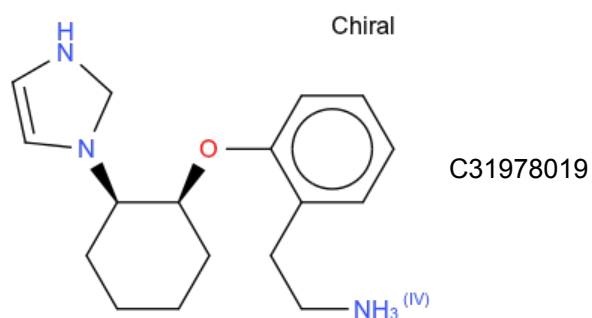

284

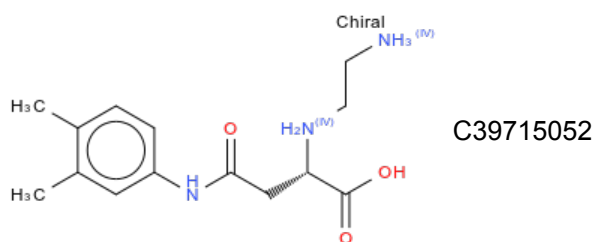

285

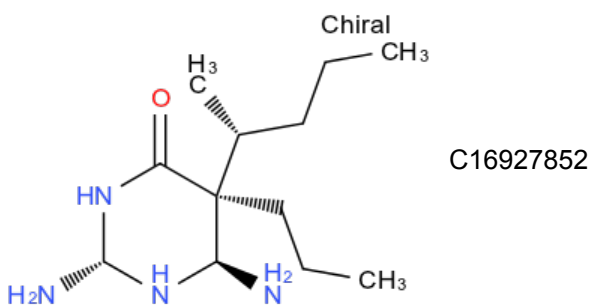

286

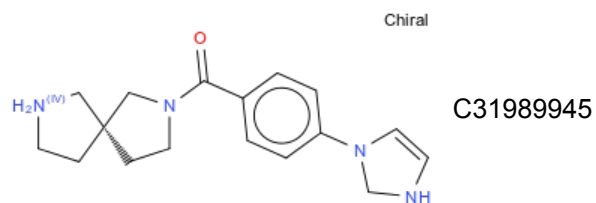

287

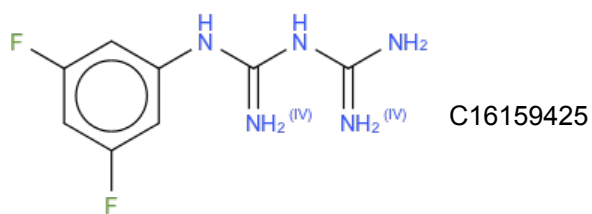

288

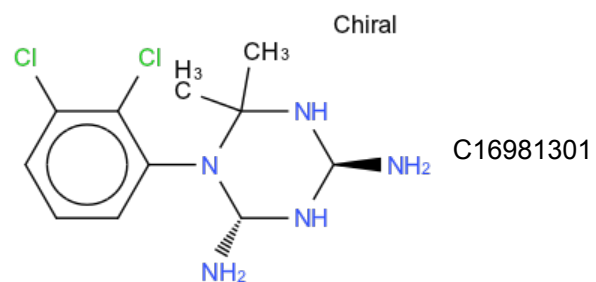

289

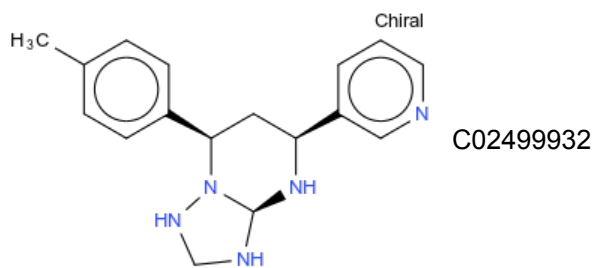

290

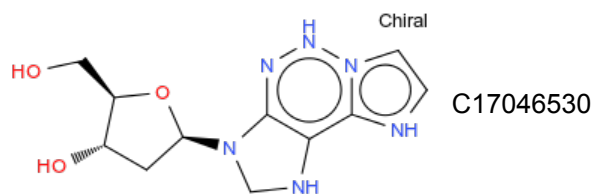

291

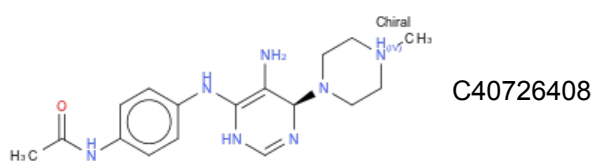

292

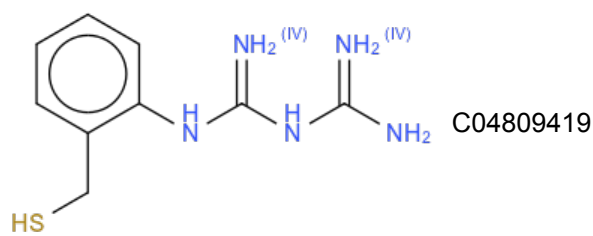

293

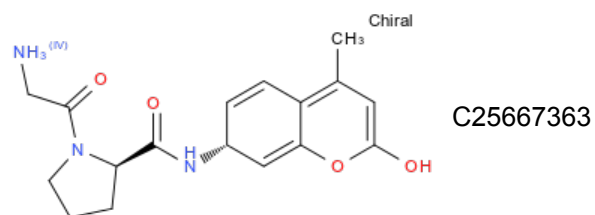

294

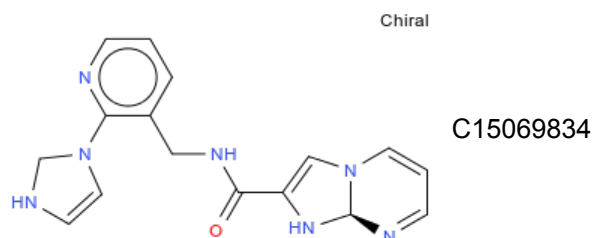

295

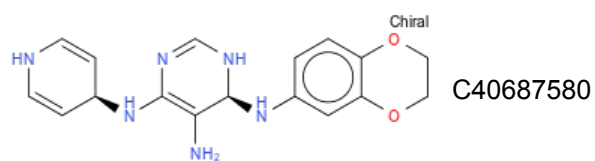

296

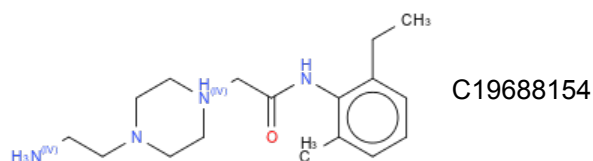

297

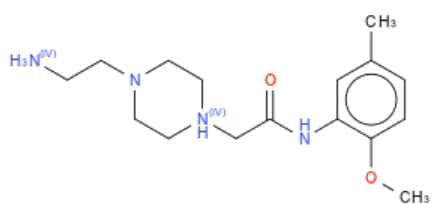

C19688160

298

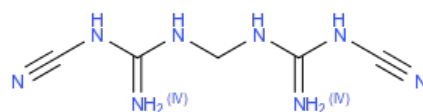

C01628839

299

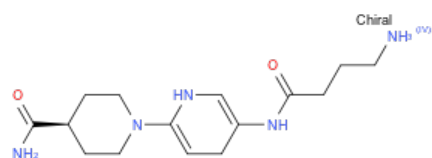

C31961099

300

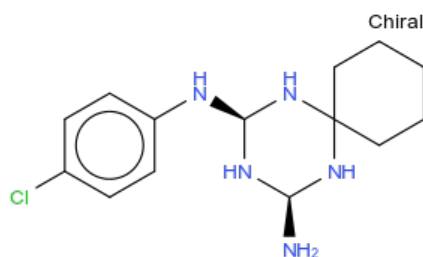

C00203755

301

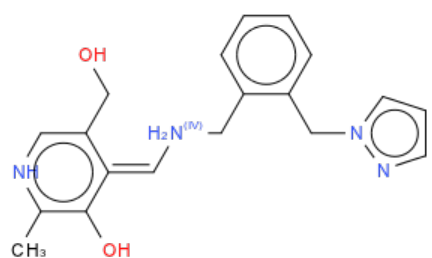

C27067279

302

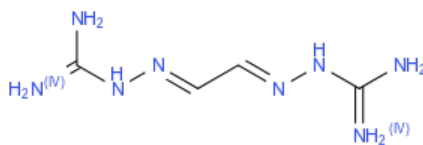

C16969657

303

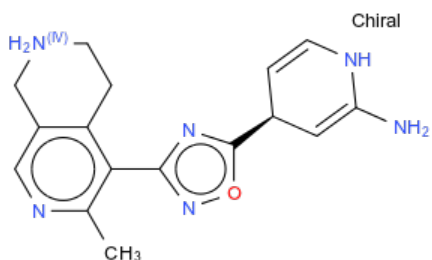

C19835726

304

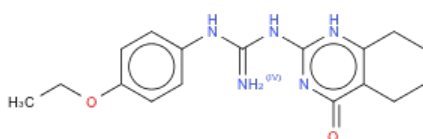

C09313260

305

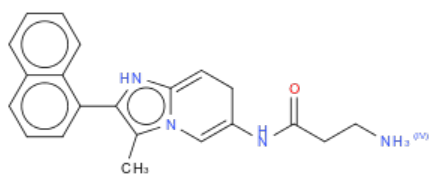

C31958751

306

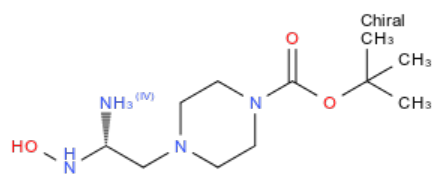

C22405376

307

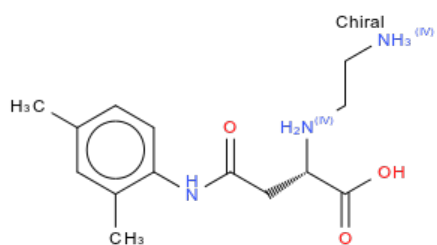

C39715050

308

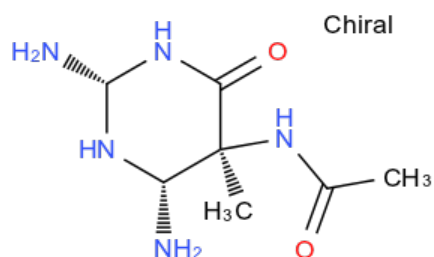

C16939550

309

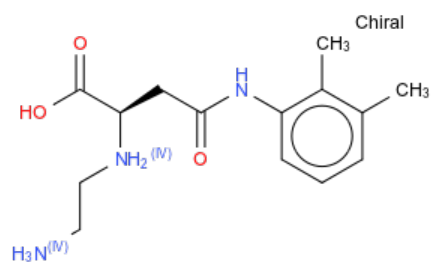

C39715049

310

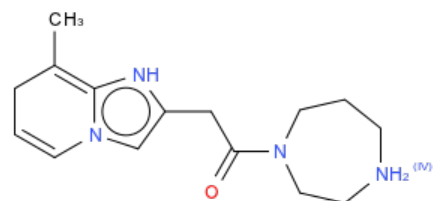

C41292015

311

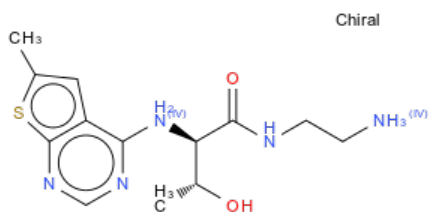

C31946508

312

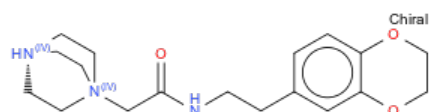

C29224491



313

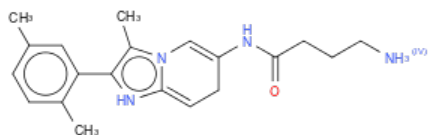

C31958694

314

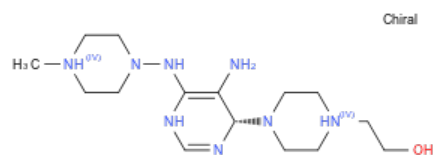

C40734261

315

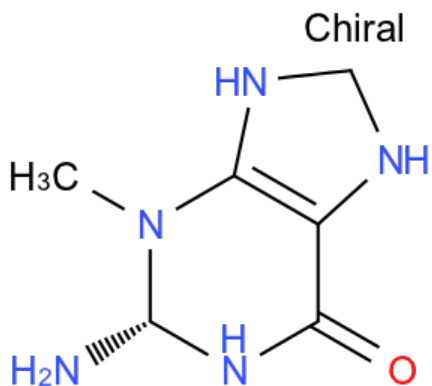

C08616085

316

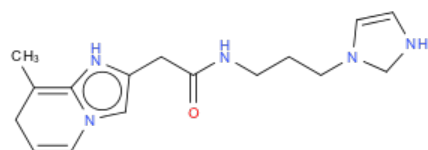

C41282767

317

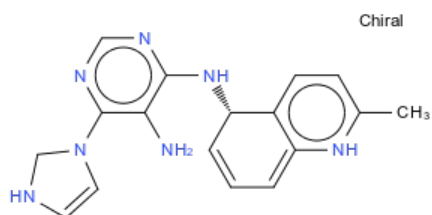

C40802333

318

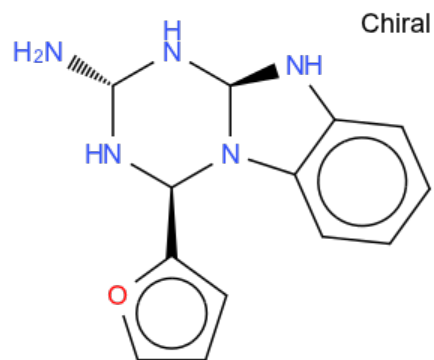

C09015915

319

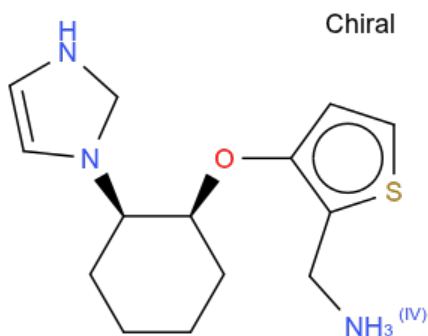

C31977892

320

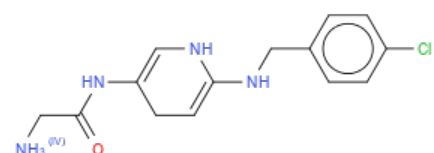

C31961548

321

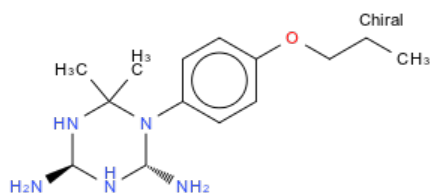

C17039700

322

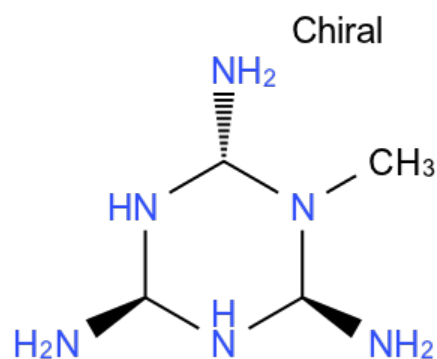

C08614354

323

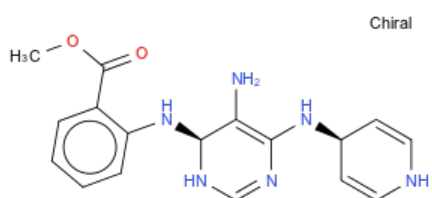

C40687578

324

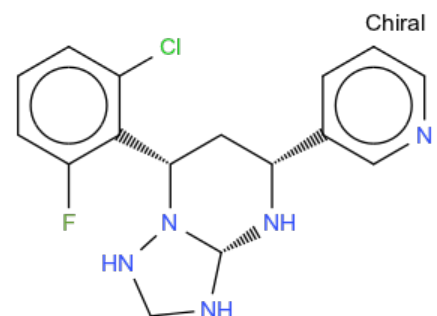

C06920117

325

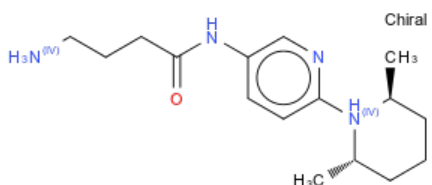

C31962545

326

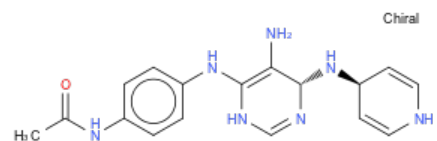

C40687659

327

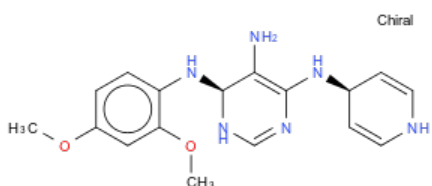

C40687553

328

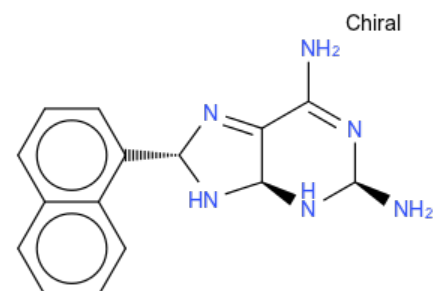

C17047255

329

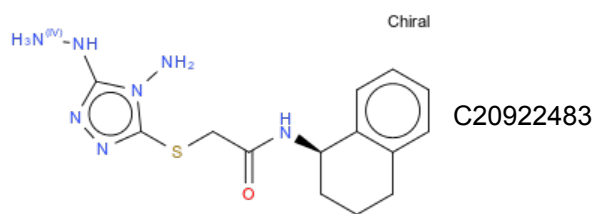

330

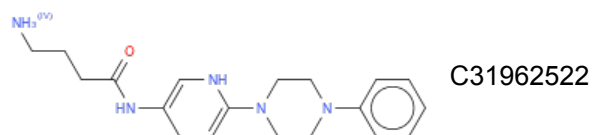

331

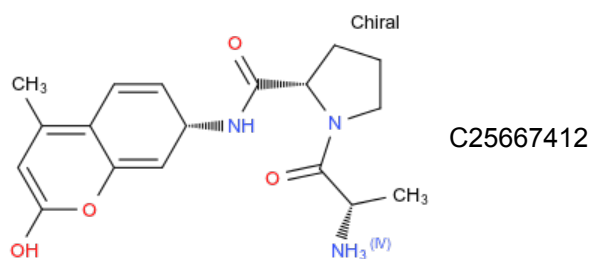

332

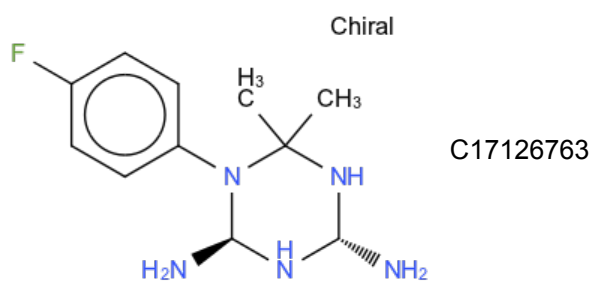

333

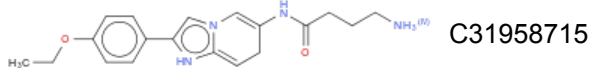

334

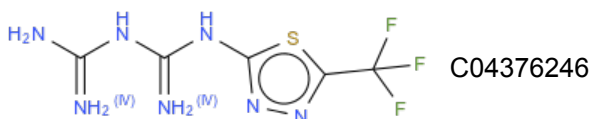

335

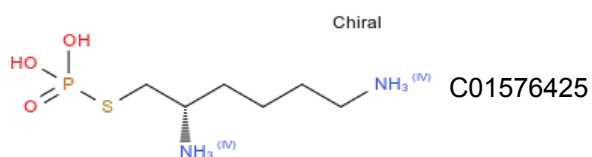

336

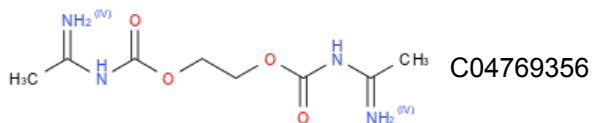

|     |                                                                                                                                                                           |     |                                                                                                                                                                            |
|-----|---------------------------------------------------------------------------------------------------------------------------------------------------------------------------|-----|----------------------------------------------------------------------------------------------------------------------------------------------------------------------------|
| 337 | <p style="text-align: center;">Chiral</p> 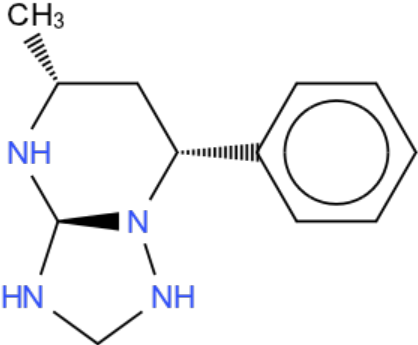 <p style="text-align: right;">C00117707</p>   | 338 | <p style="text-align: center;">Chiral</p>  <p style="text-align: right;">C04625587</p>   |
| 339 |  <p style="text-align: right;">C13283554</p>                                             | 340 |  <p style="text-align: right;">C20922696</p>                                             |
| 341 | <p style="text-align: center;">Chiral</p>  <p style="text-align: right;">C19454513</p> | 342 |  <p style="text-align: right;">C00089321</p>                                           |
| 343 |  <p style="text-align: right;">C41224016</p>                                           | 344 | <p style="text-align: center;">Chiral</p>  <p style="text-align: right;">C20344258</p> |

345

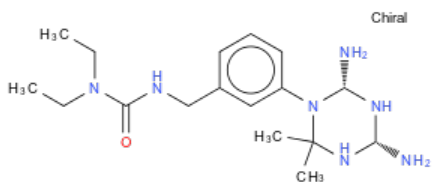

C16956089

346

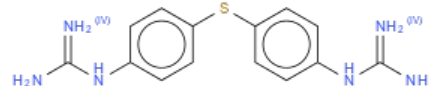

C01705420

347

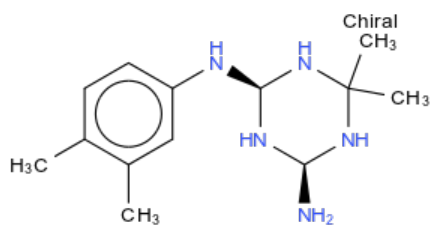

C00203682

348

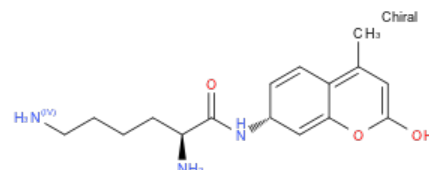

C25667158

349

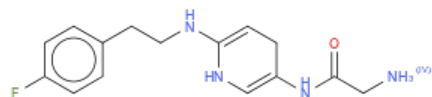

C31961564

350

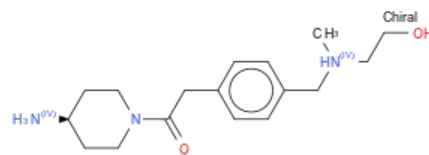

C33451818

351

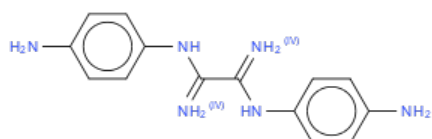

C05011412

352

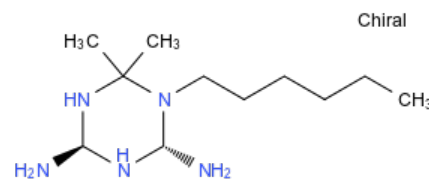

C17040330

353

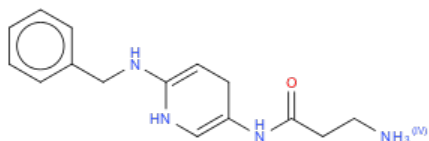

C31961163

354

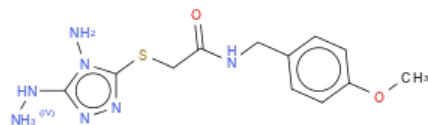

C21035509

355

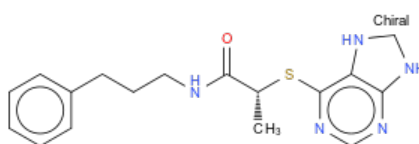

C13569777

356

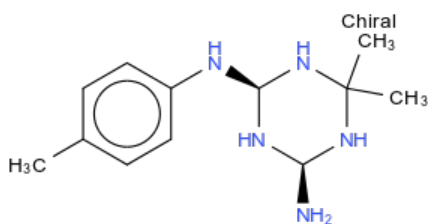

C03886785

357

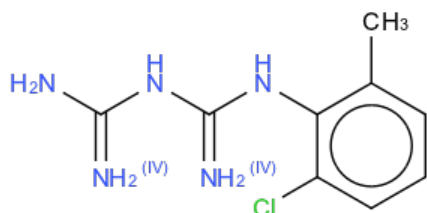

C00089327

358

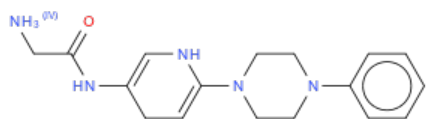

C20328244

359

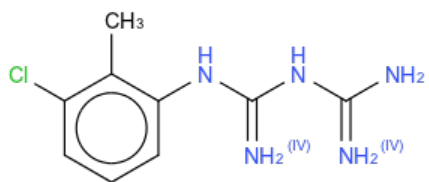

C00470512

360

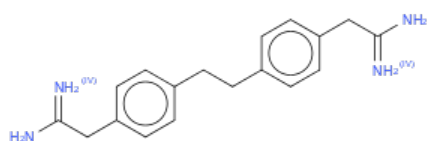

C01718360

361

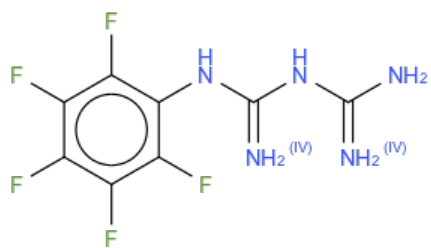

C03954522

362

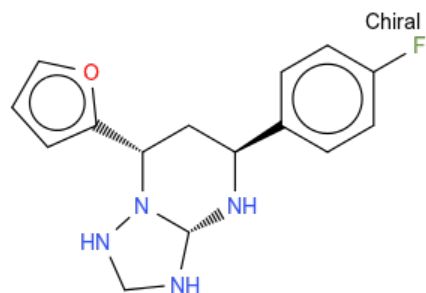

C13131879

363

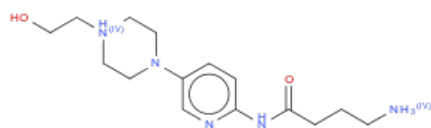

C31962440

364

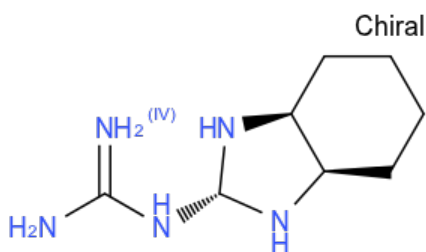

C13633908

365

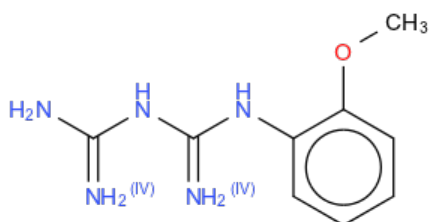

C00089337

366

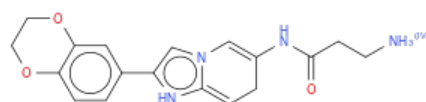

C31958798

367

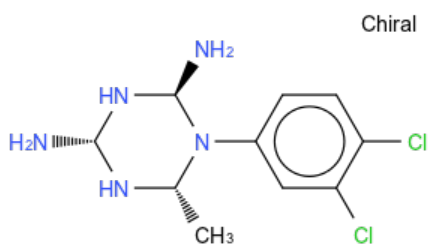

C17353521

368

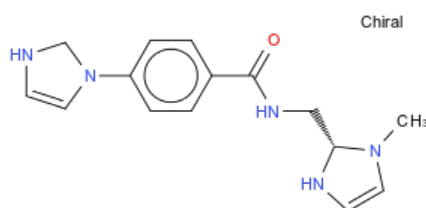

C41570745

369

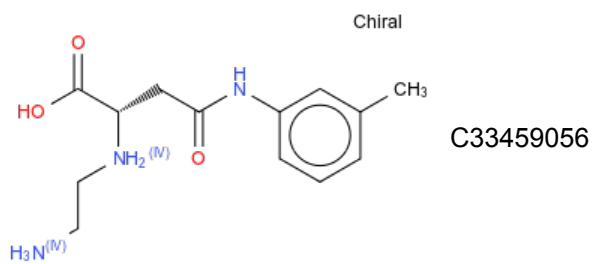

370

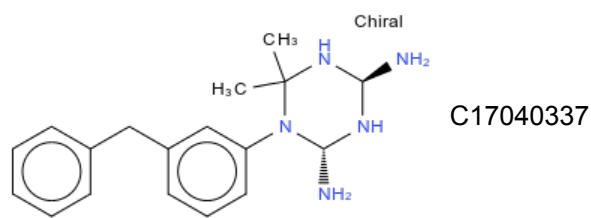

371

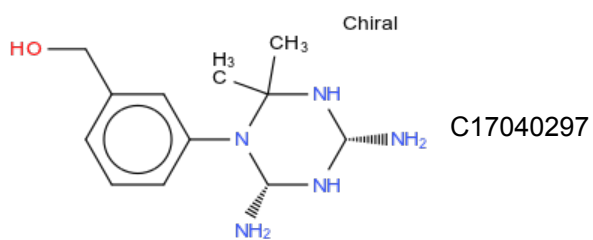

372

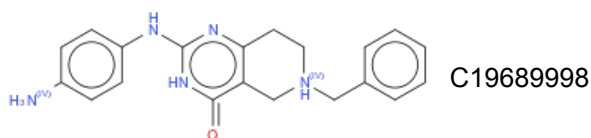

373

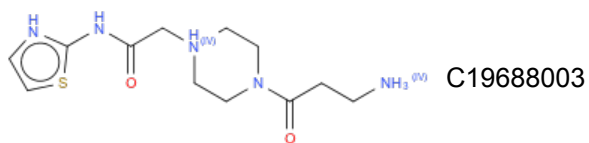

374

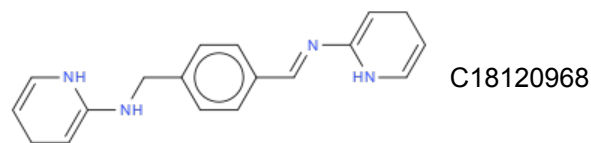

375

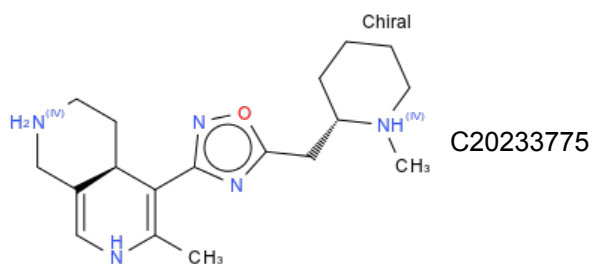

376

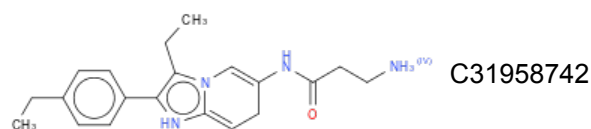



377

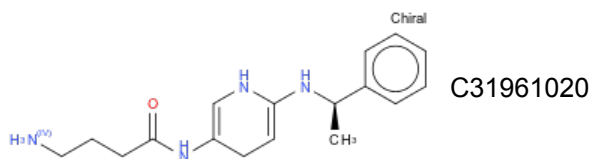

C31961020

378

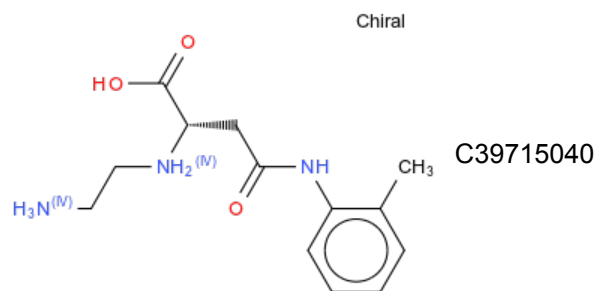

C39715040

379

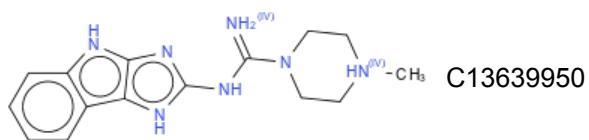

C13639950

380

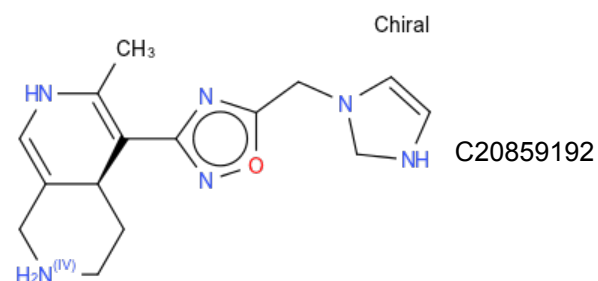

C20859192

381

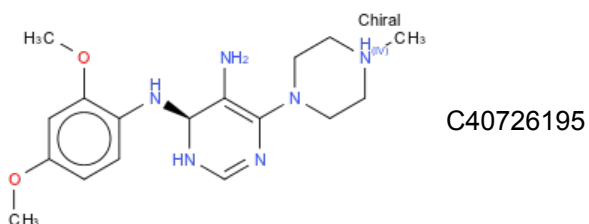

C40726195

382

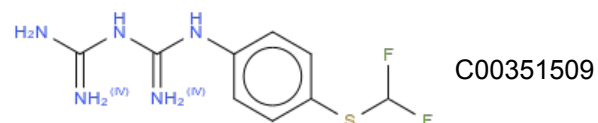

C00351509

383

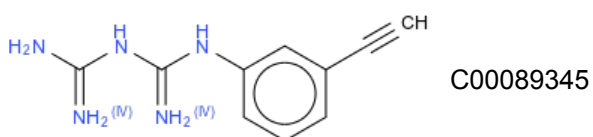

C00089345

384

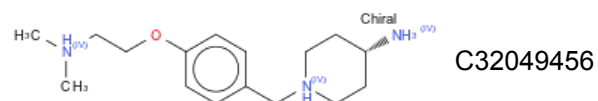

C32049456

385

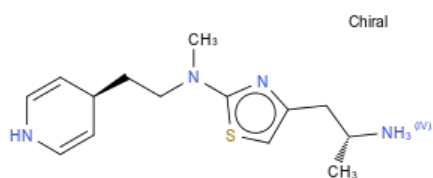

C28509575

386

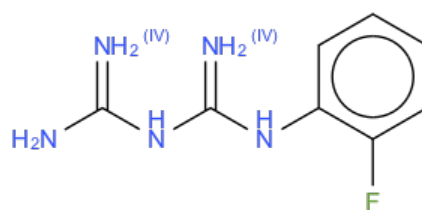

C00089761

387

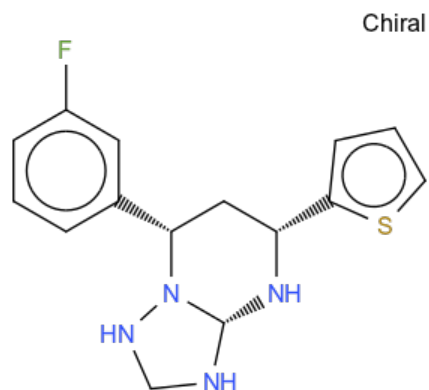

C00221865

388

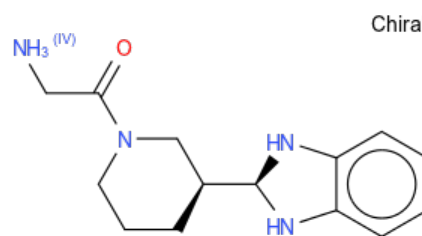

C40817586

389

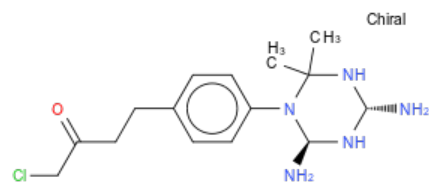

C17040323

390

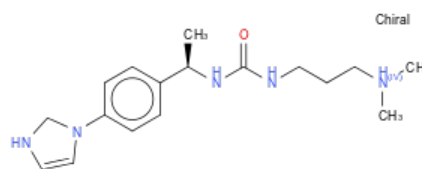

C42923697

391

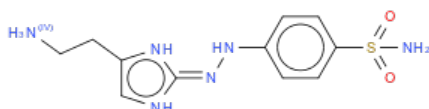

C04772363

392

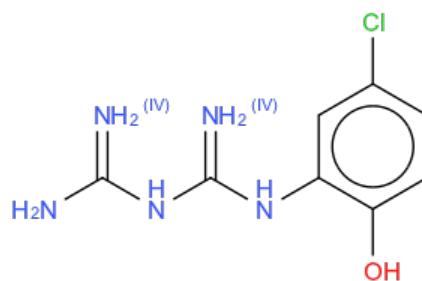

C00089628

393

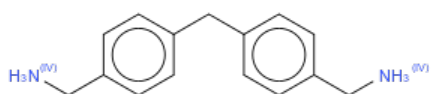

C01574115

394

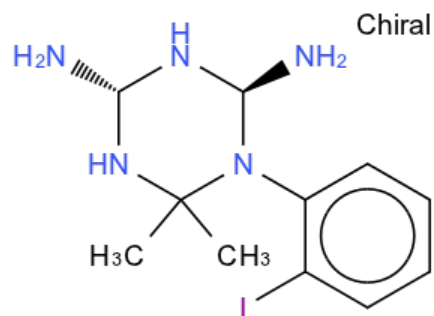

C17040510

395

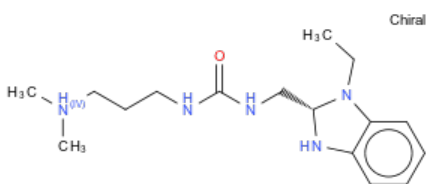

C42923355

396

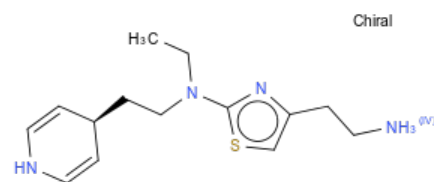

C20185310

397

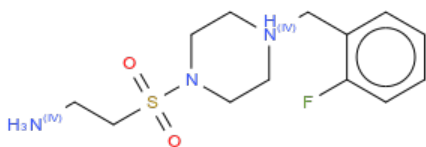

C19688590

398

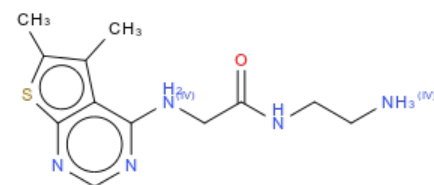

C31946489

399

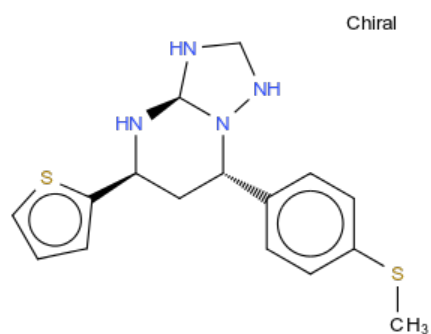

C00221970

400

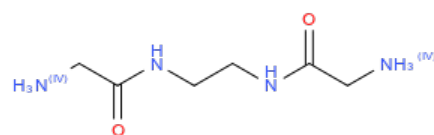

C06157424

401

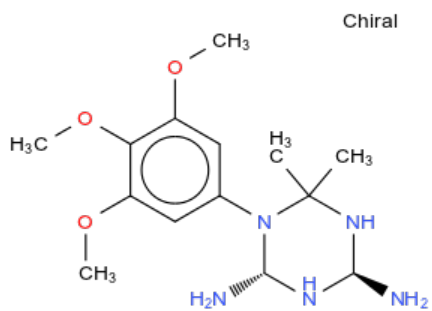

402

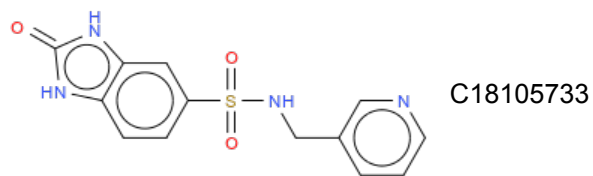

403

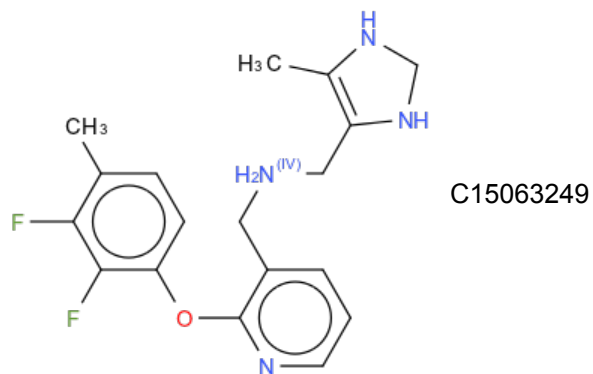

404

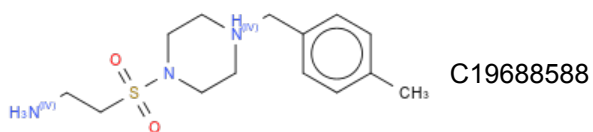

405

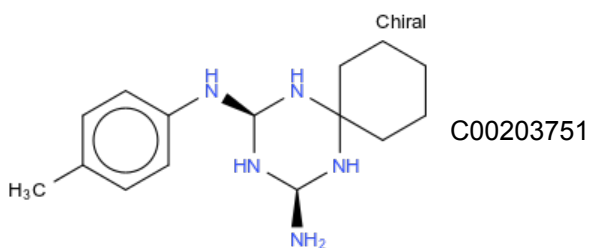

406

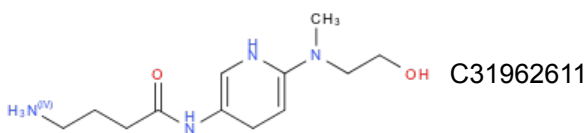

407

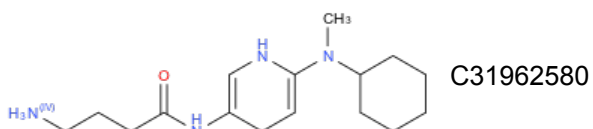

408

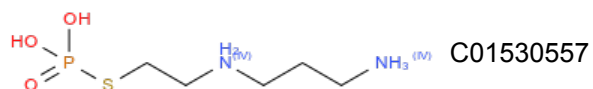

409

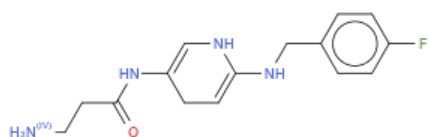

C31961208

410

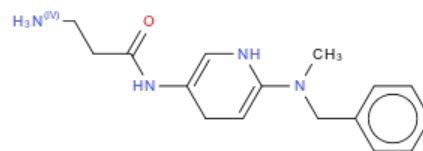

C31962733

411

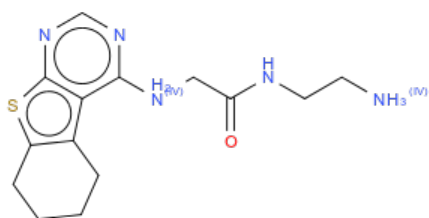

C31946475

412

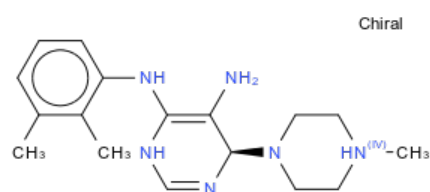

C40726199

413

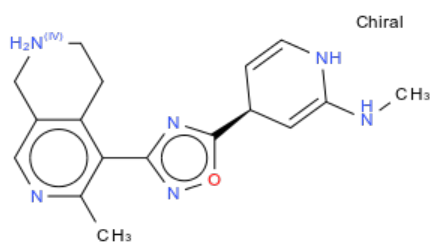

C19792542

414

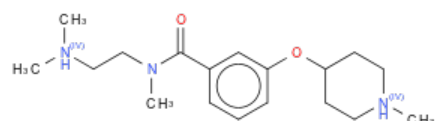

C12588110

415

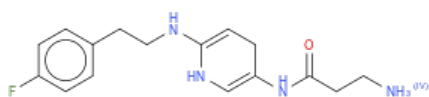

C31961282

416

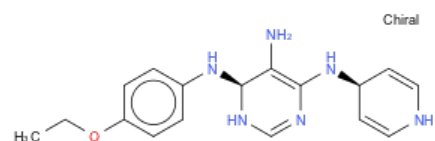

C40687604

417

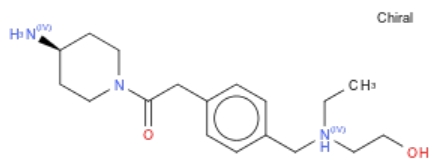

C33460572

418

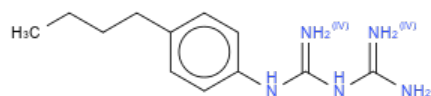

C05607069

419

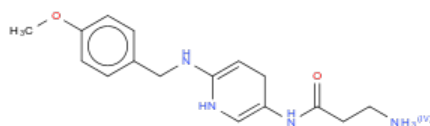

C31961205

420

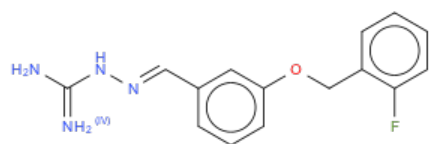

C41223735

421

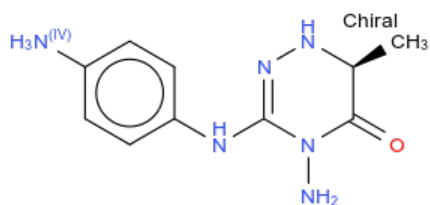

C19689733

422

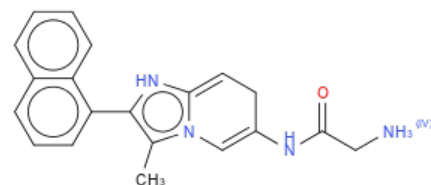

C31958847

423

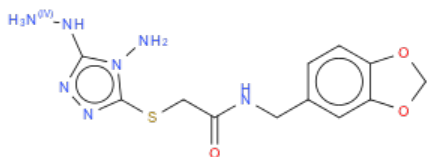

C21035782

424

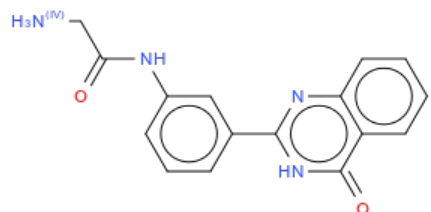

C40819598

425

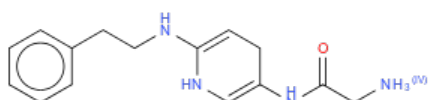

C31961400

426

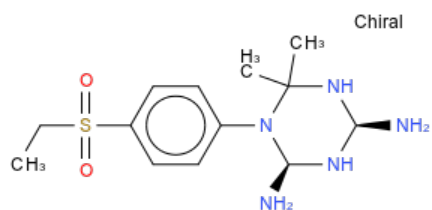

C08581552

427

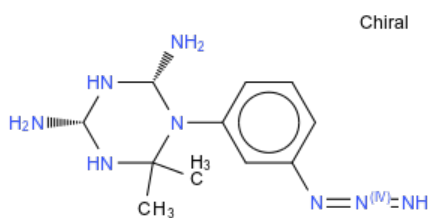

C17109065

428

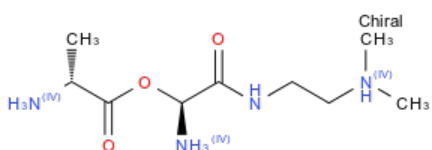

C01704459

429

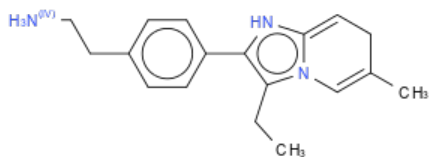

C19767765

430

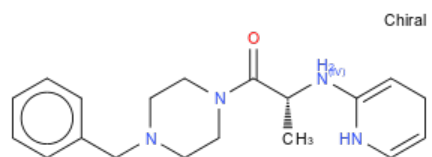

C20458777

431

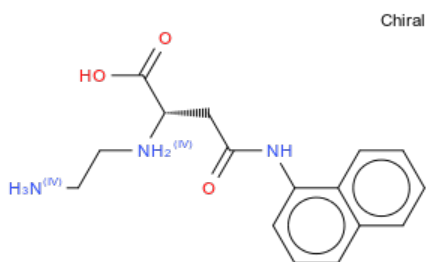

C39715046

432

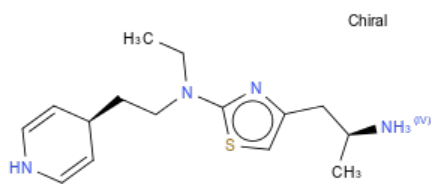

C28509583

433

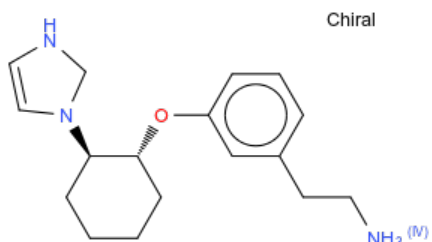

C31978047

434

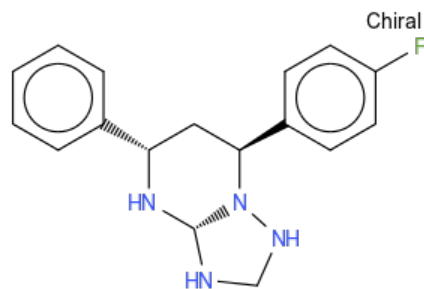

C13131885

435

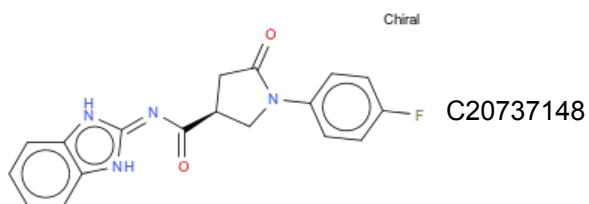

C20737148

436

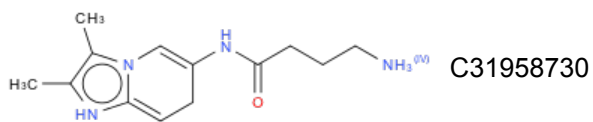

C31958730

437

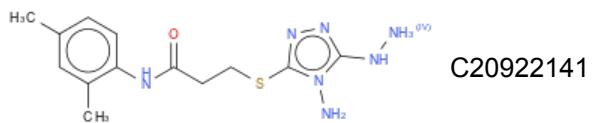

C20922141

438

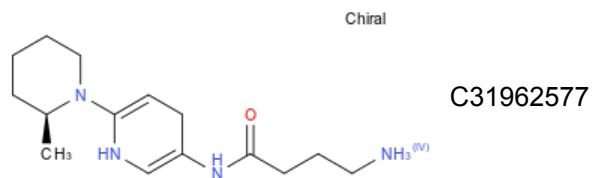

C31962577

439

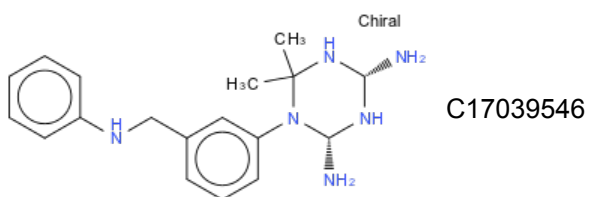

C17039546

440

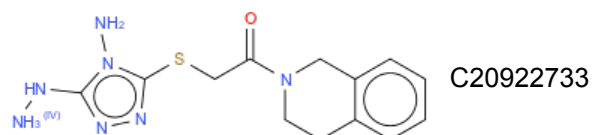

C20922733



441

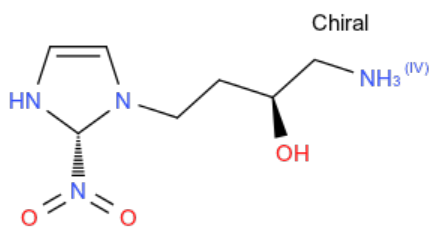

C05975089

442

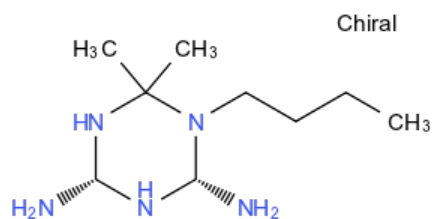

C17040353

443

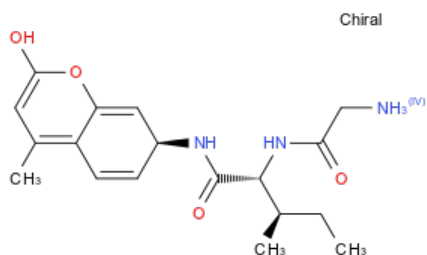

C25667419

444

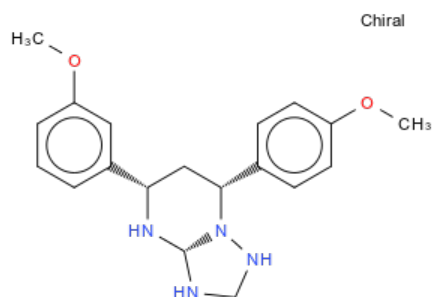

C00533246

445

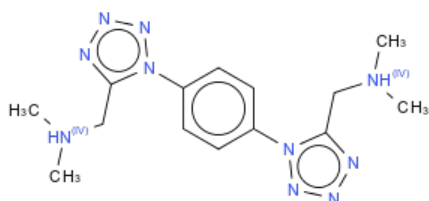

C04491708

446

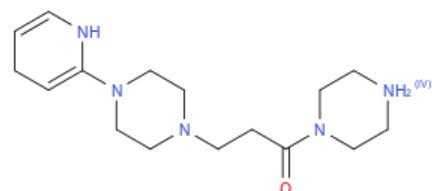

C32067536

447

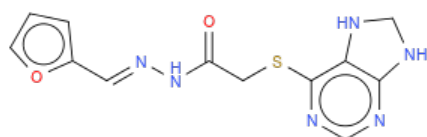

C06565613

448

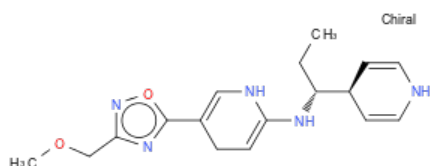

C19952396

449

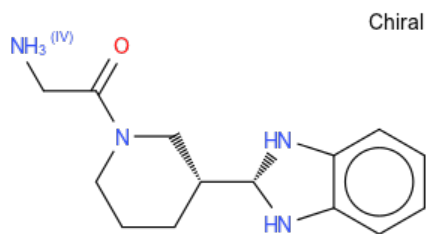

C40817585

450

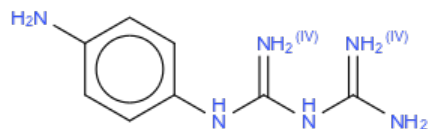

C04707034

451

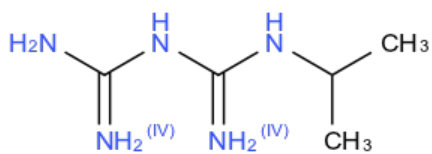

C04411343

452

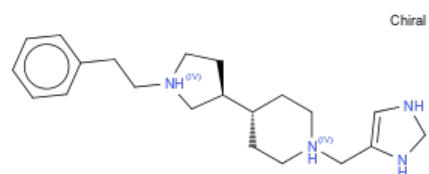

C12300291

453

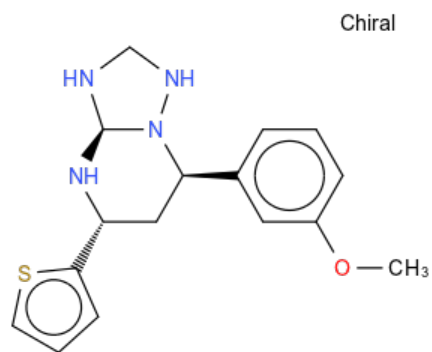

C13123740

454

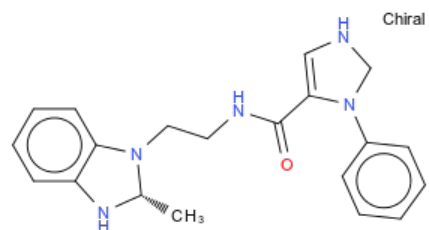

C15136088

455

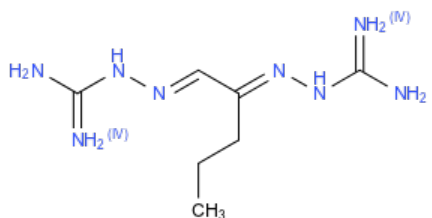

C16952684

456

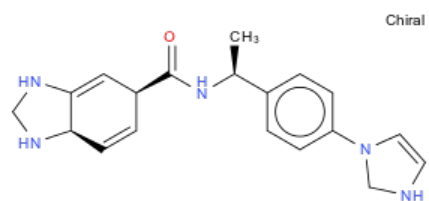

C12550949

457

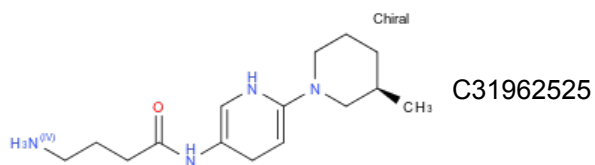

458

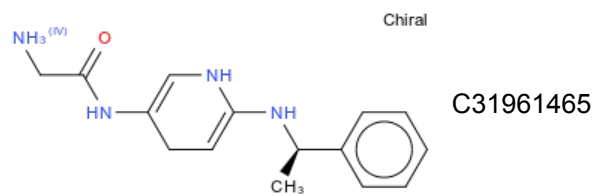

459

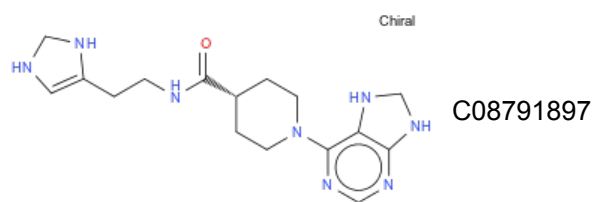

460

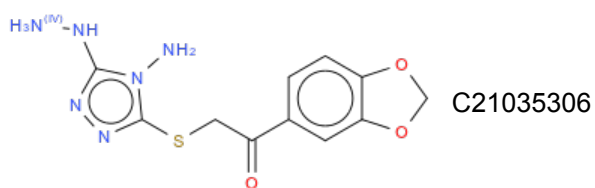

461

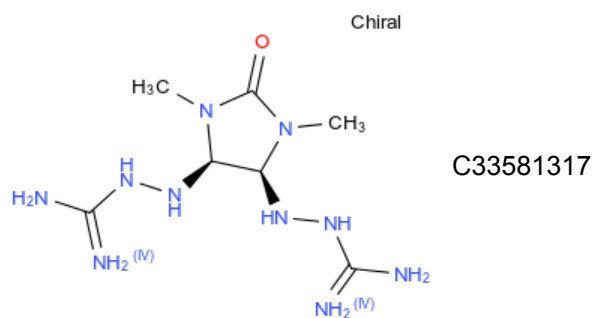

462

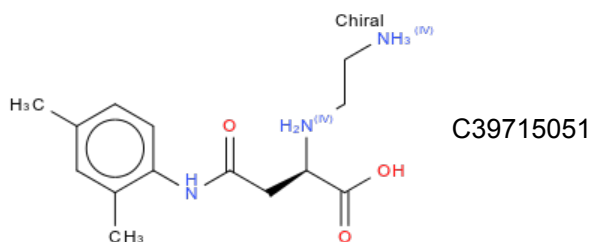

463

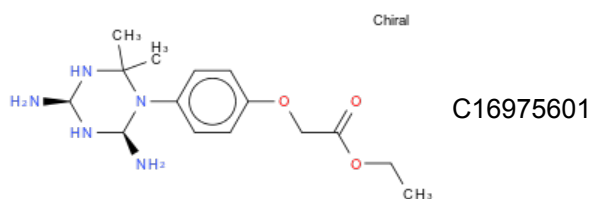

464

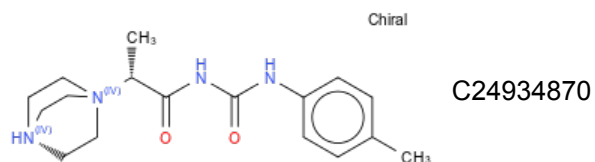

465

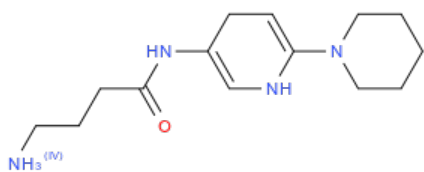

C31962628

466

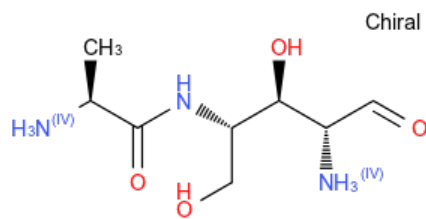

C17064468

467

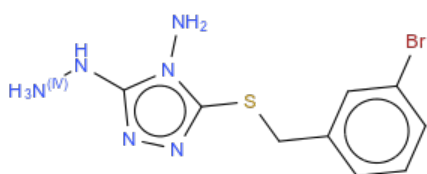

C21035322

468

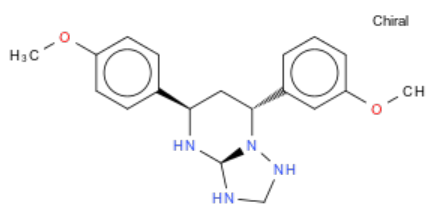

C05098729

469

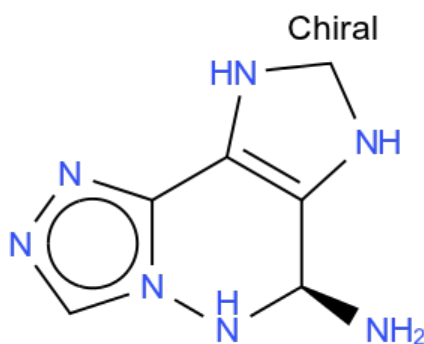

C17289863

470

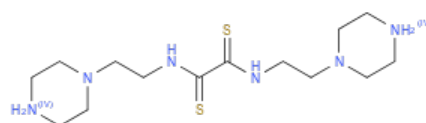

C19864754

471

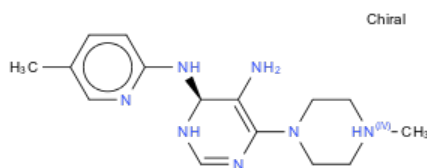

C40726414

472

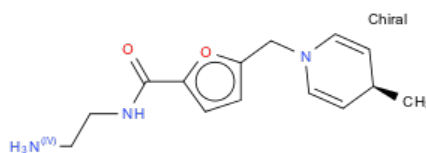

C31947123

473

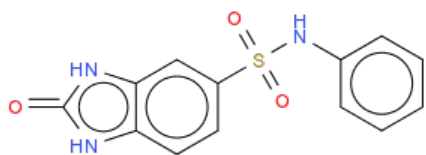

C05012090

474

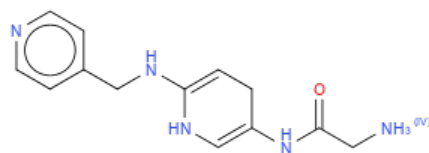

C31961458

475

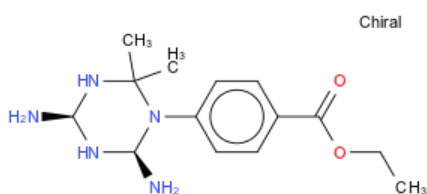

C17039522

476

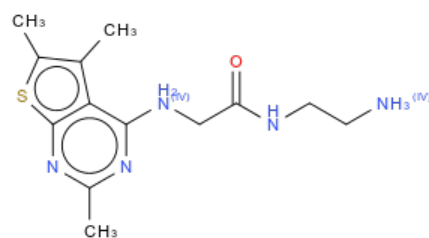

C31946514

477

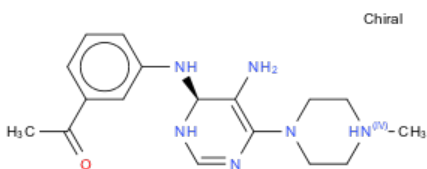

C40705190

478

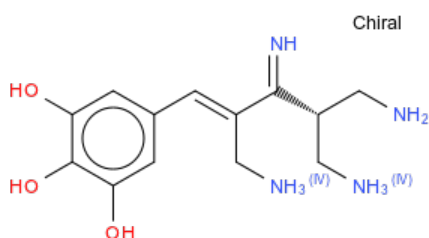

C27646839

479

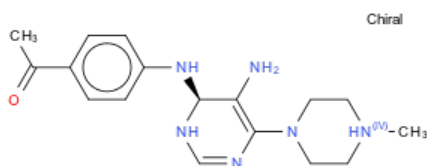

C40726299

480

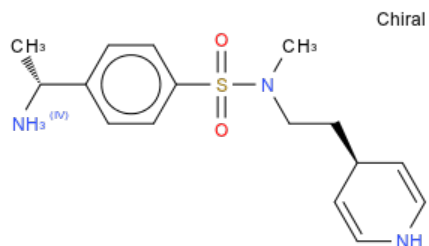

C20187903

481

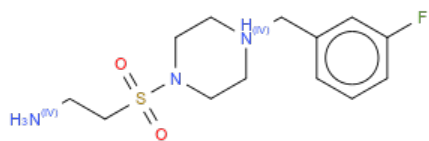

C19688592

482

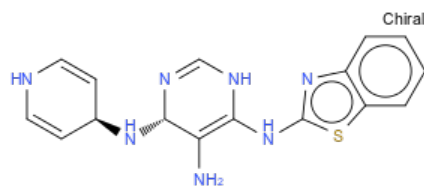

C40687576

483

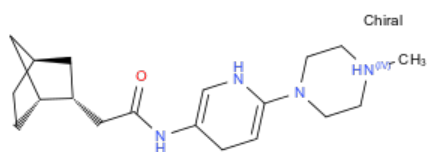

C14520561

484

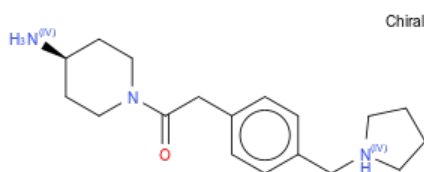

C33450295

485

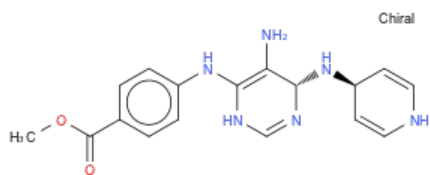

C40687606

486

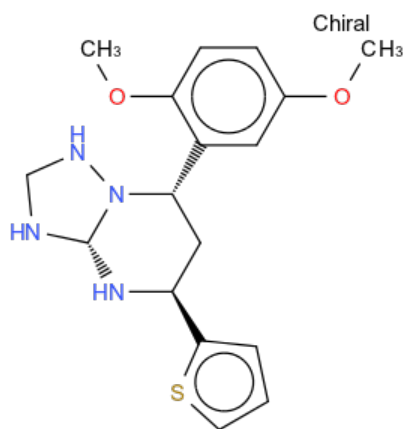

C00221790

487

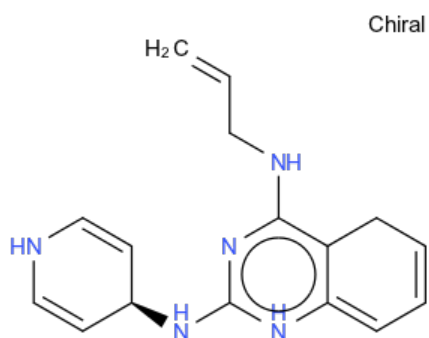

C41150707

488

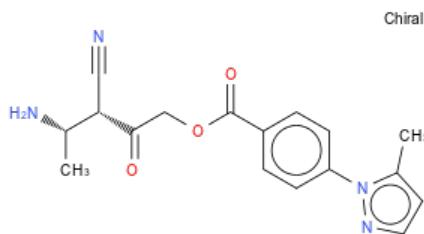

C07210338

489

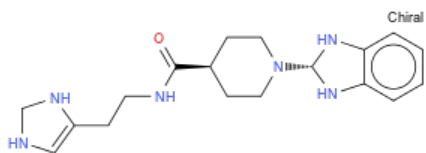

C33070960

490

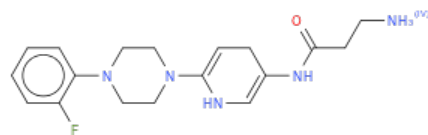

C31962762

491

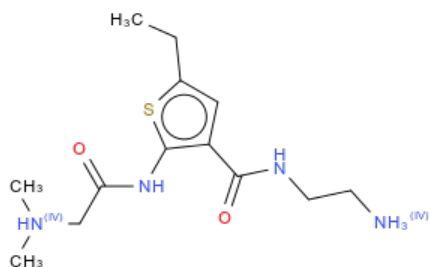

C31946848

492

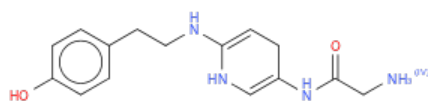

C31961298

493

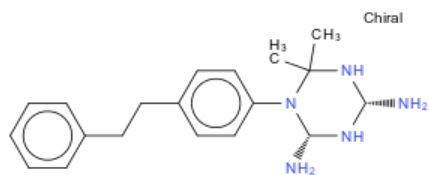

C08627925

494

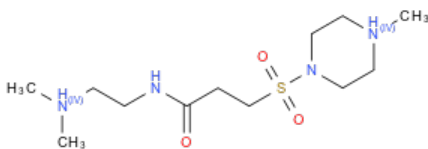

C41227697

495

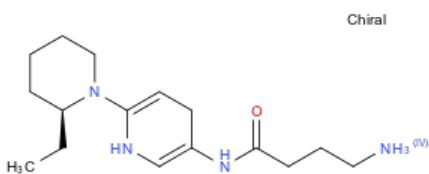

C31962512

496

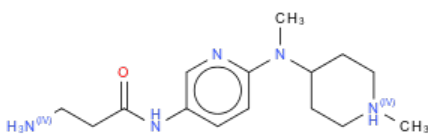

C31962731

497

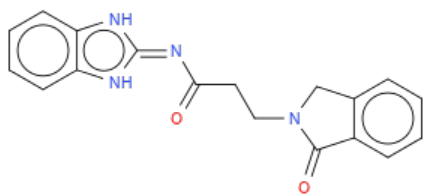

C20723593

498

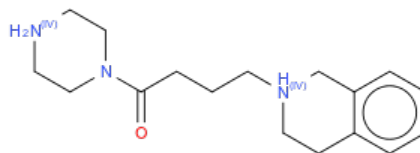

C32051296

499

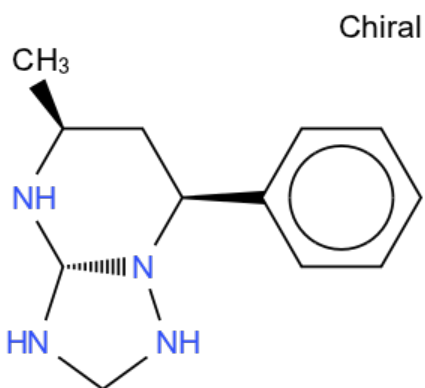

C00117695

500

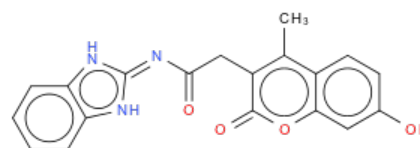

C09060106



Table S2

| RANK | Structure                                                                                                        | ZINC      | RANK | Structure                                                                                                         | ZINC      |
|------|------------------------------------------------------------------------------------------------------------------|-----------|------|-------------------------------------------------------------------------------------------------------------------|-----------|
| 1    | <p>Chiral</p> 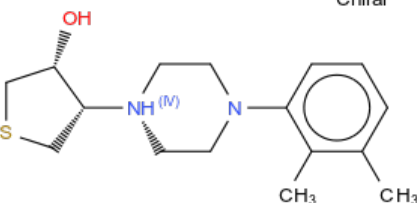 <p>C13727245</p> | C13727245 | 2    |  <p>C20799873</p>               | C20799873 |
| 3    | <p>Chiral</p>  <p>C13727253</p> | C13727253 | 4    | <p>Chiral</p>  <p>C13727248</p> | C13727248 |
| 5    |  <p>C00001763</p>             | C00001763 | 6    |  <p>C31962462</p>             | C31962462 |
| 7    |  <p>C31962640</p>             | C31962640 | 8    |  <p>C31961455</p>             | C31961455 |

9

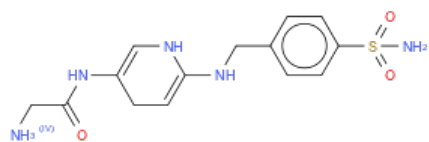

C31961318

10

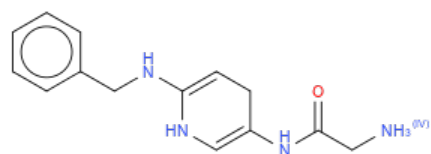

C31961369

11

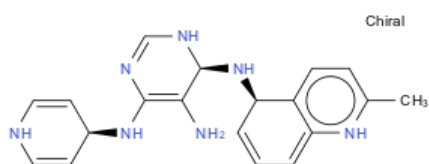

C40687701

12

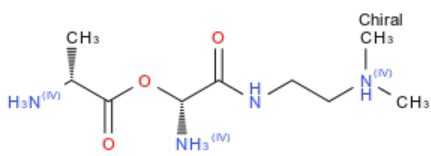

C01704461

13

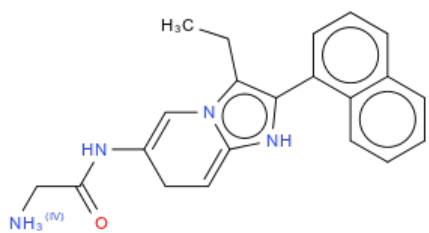

C31958809

14

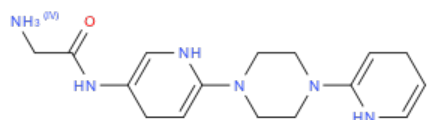

C31962775

15

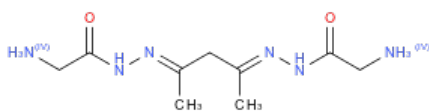

C05368804

16

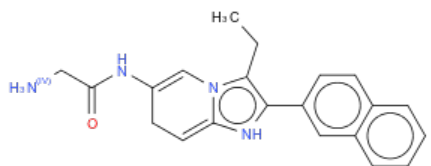

C31958806

17

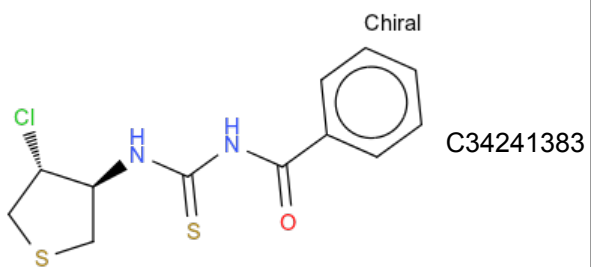

18

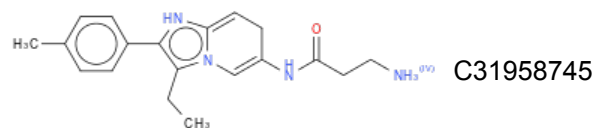

19

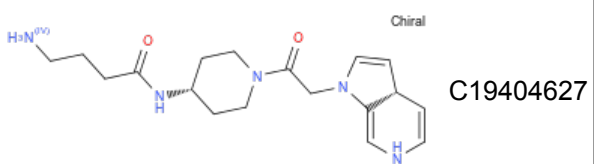

20

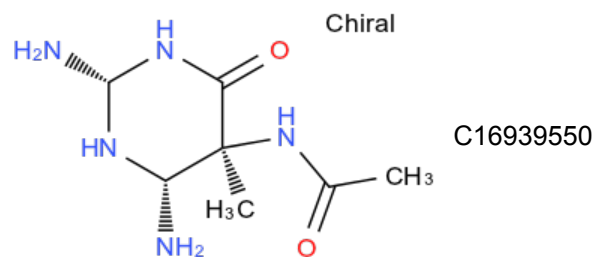

21

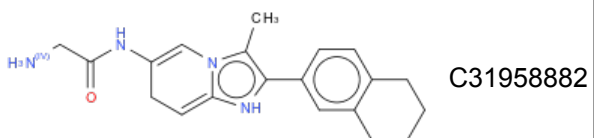

22

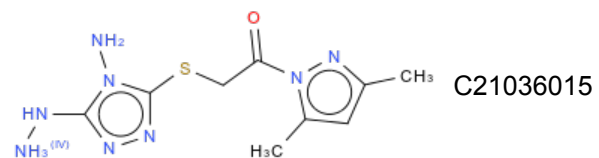

23

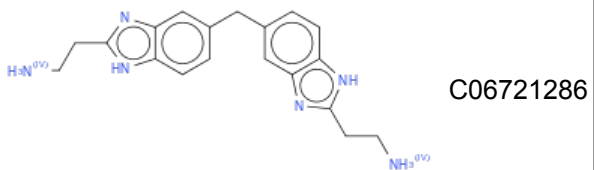

24

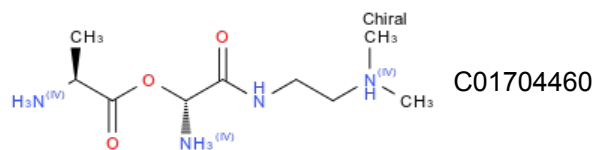

25

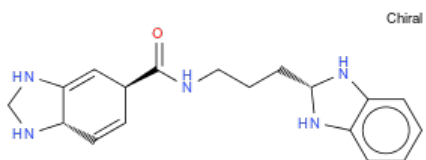

C11484801

26

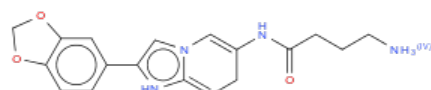

C31958732

27

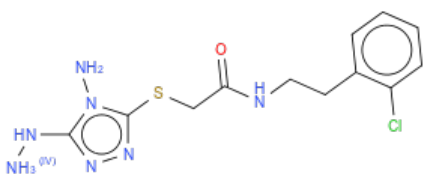

C21036059

28

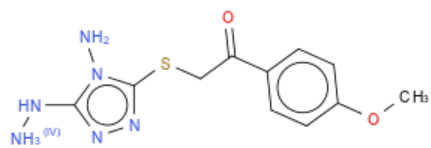

C21035291

29

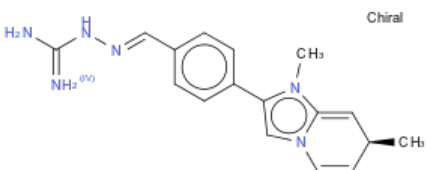

C16940922

30

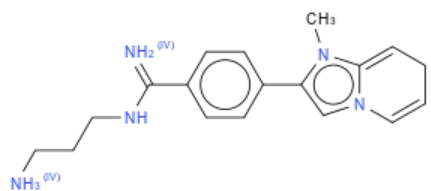

C04671295

31

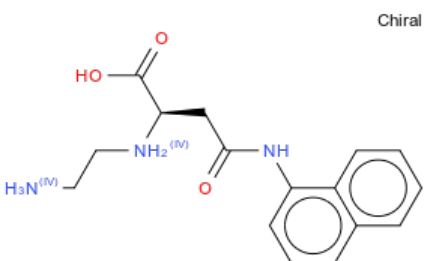

C39715047

32

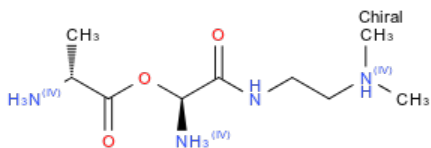

C01704459

33

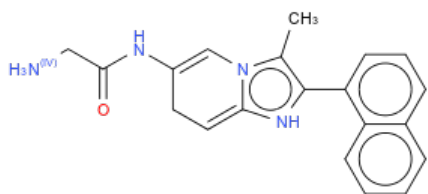

C31958847

34

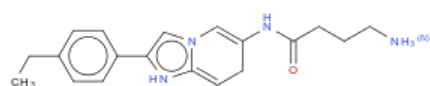

C31958726

35

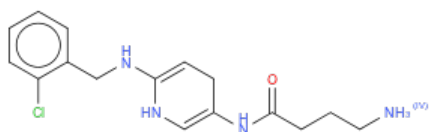

C31961103

36

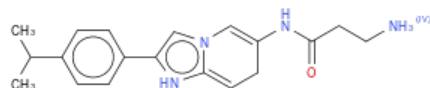

C31958792

37

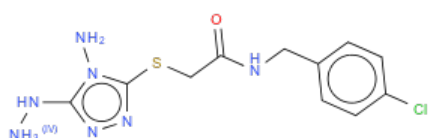

C21035775

38

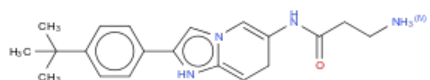

C31958780

39

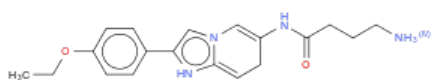

C31958715

40

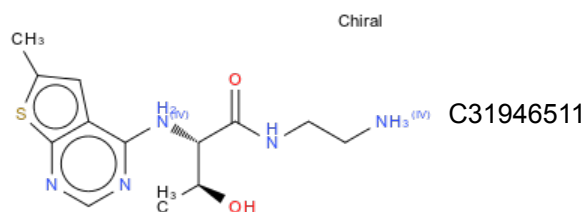

C31946511

41

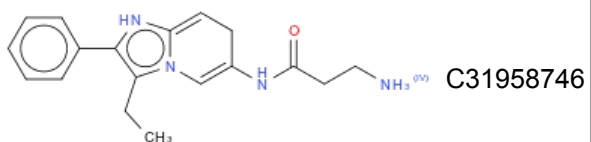

42

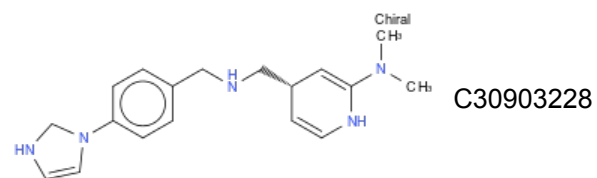

43

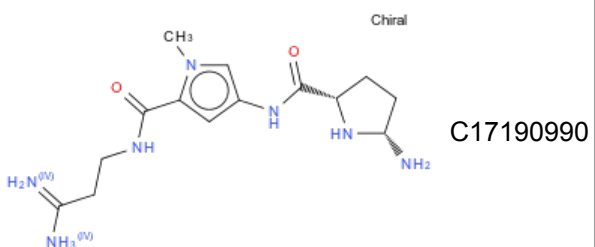

44

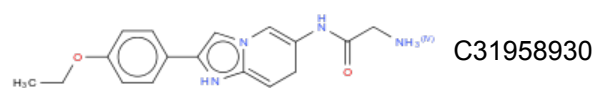

45

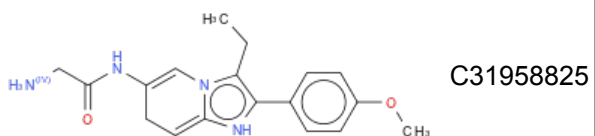

46

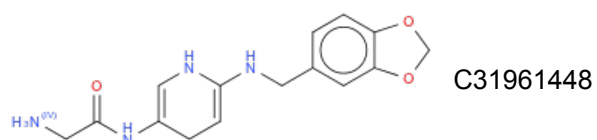

47

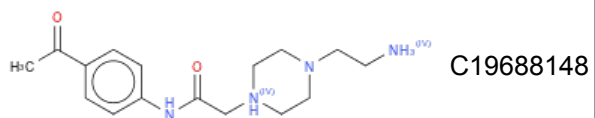

48

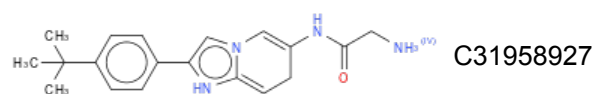

49

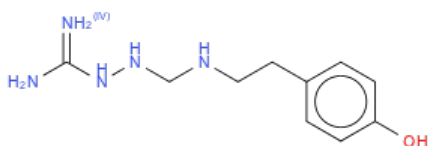

C17354102

50

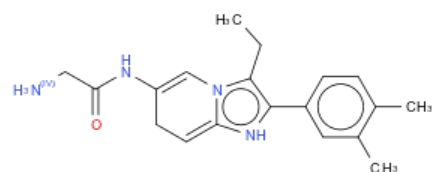

C31958828

51

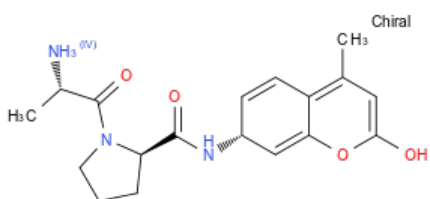

C25667402

52

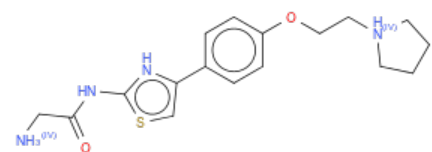

C31959645

53

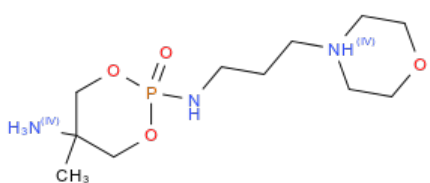

C01702938

54

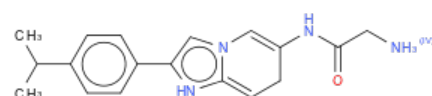

C31958945

55

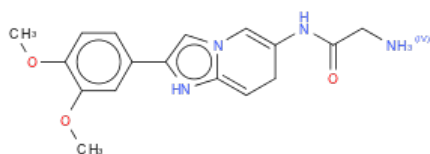

C31958937

56

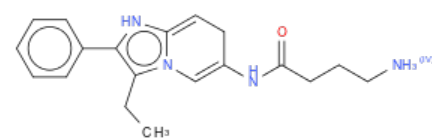

C31958692

57

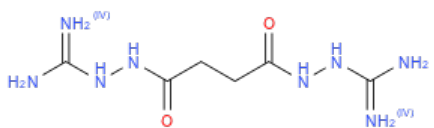

C04159326

58

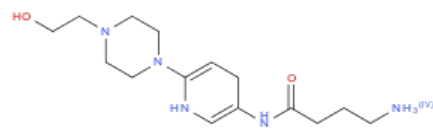

C31962563

59

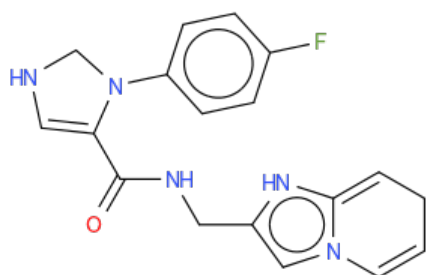

C08279195

60

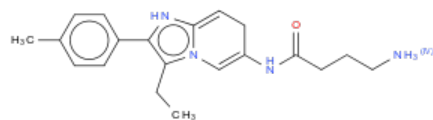

C31958689

61

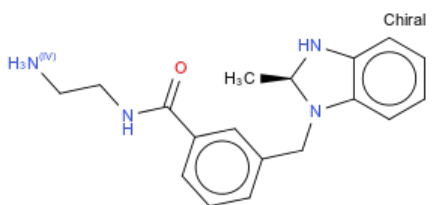

C31946235

62

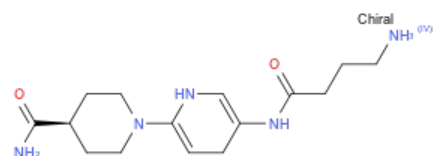

C31961099

63

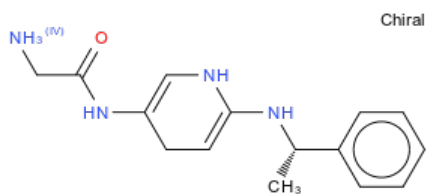

C31961471

64

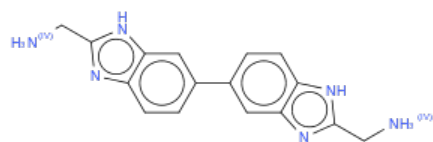

C20494271



65

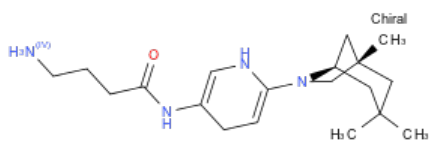

C31962623

66

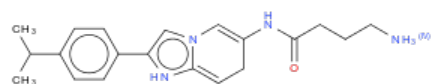

C31958723

67

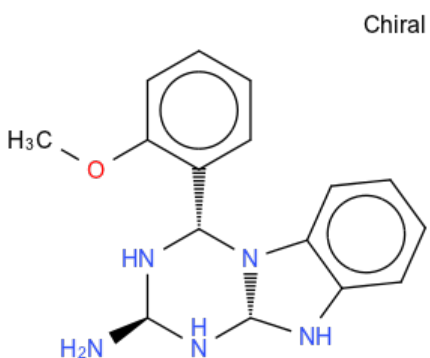

C00534836

68

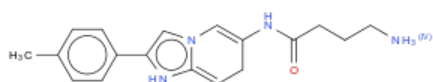

C31958728

69

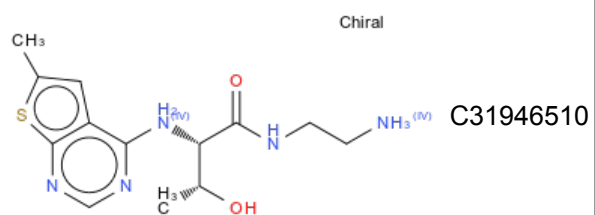

C31946510

70

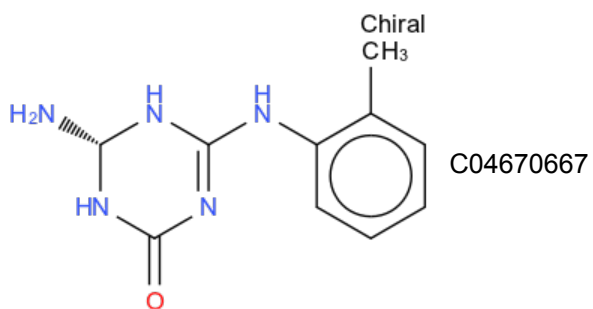

C04670667

71

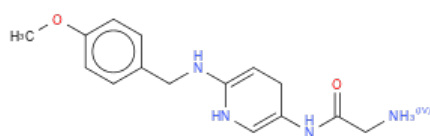

C31961432

72

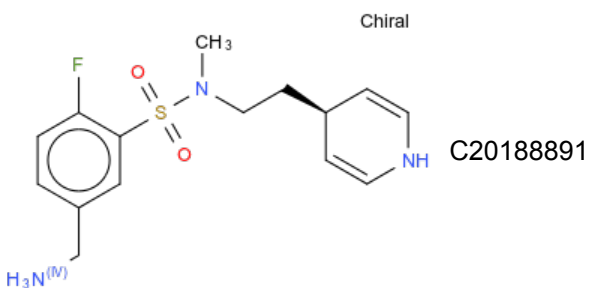

C20188891

73

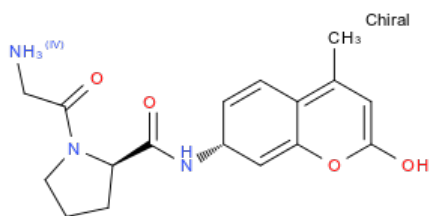

C25667363

74

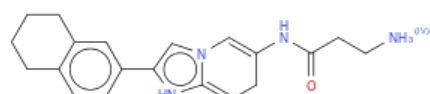

C31958790

75

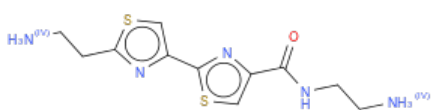

C01610256

76

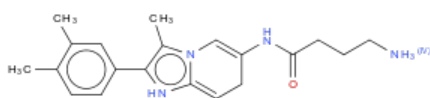

C31958699

77

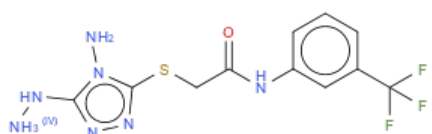

C21036212

78

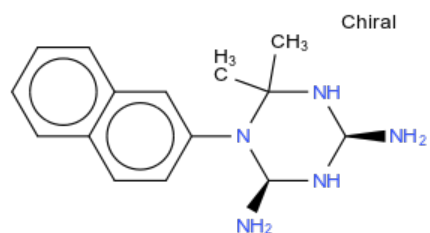

C08627252

79

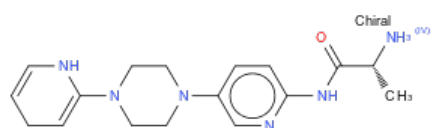

C31962059

80

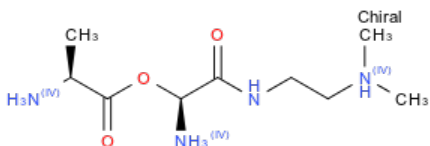

C01704458

81

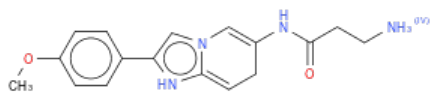

C31958785

82

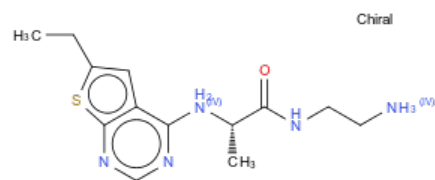

C31946479

83

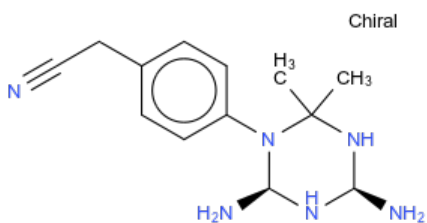

C16954549

84

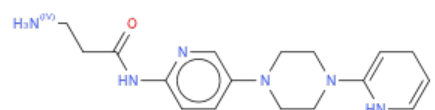

C31962411

85

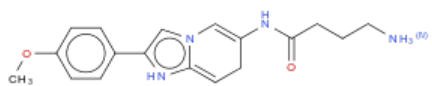

C31958718

86

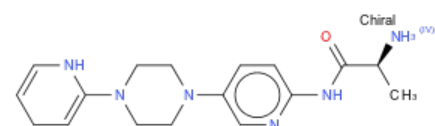

C31962067

87

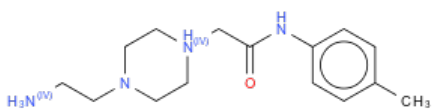

C19688111

88

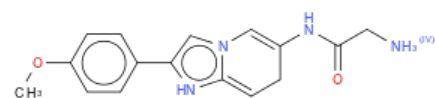

C31958934

89

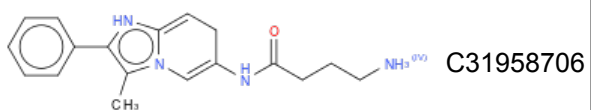

90

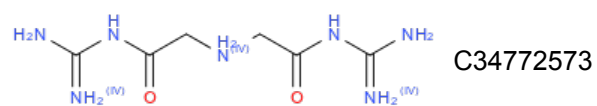

91

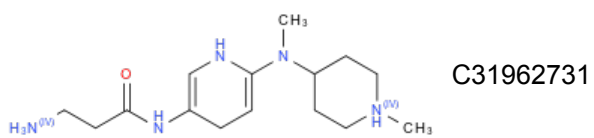

92

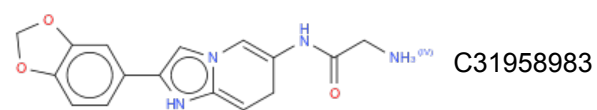

93

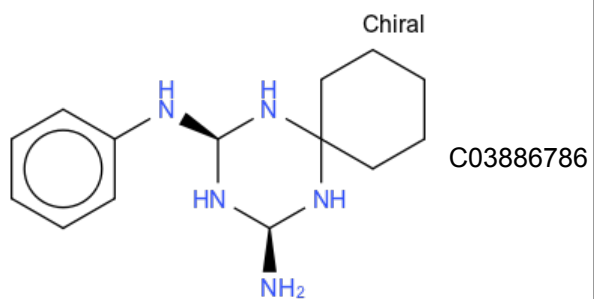

94

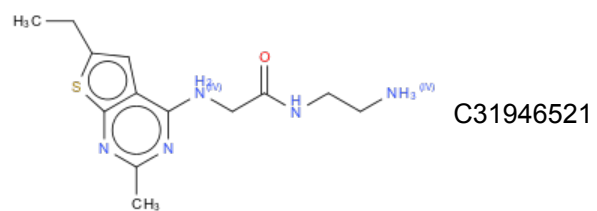

95

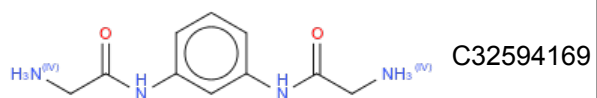

96

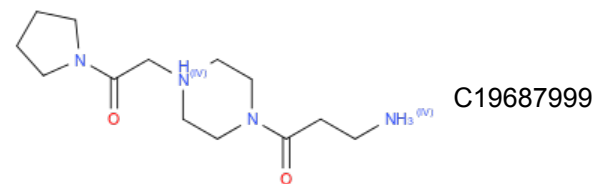

97

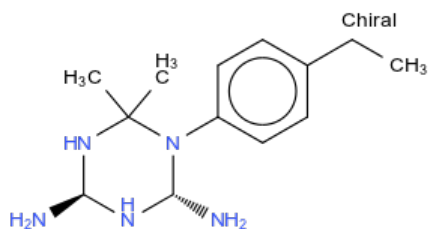

C17039694

98

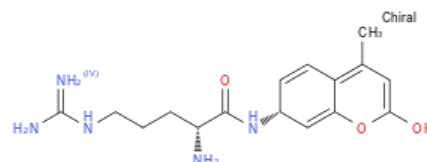

C25667105

99

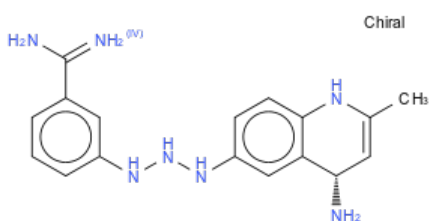

C17174446

100

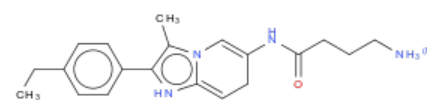

C31958702

101

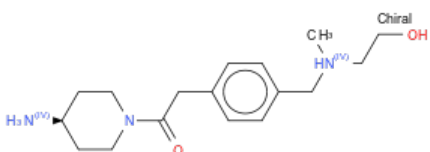

C33451818

102

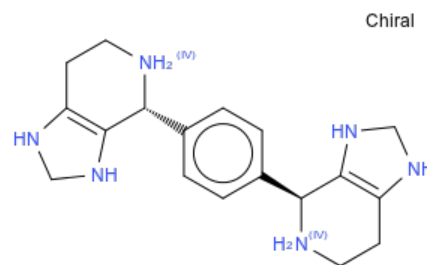

C13284784

103

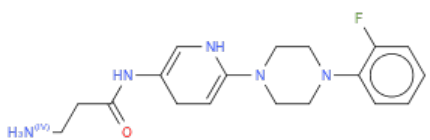

C31962762

104

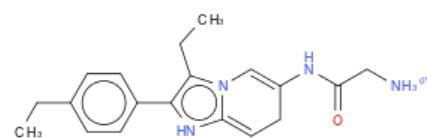

C31958834

105

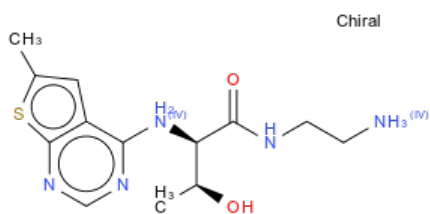

C31946509

106

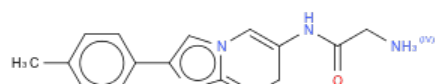

C31958952

107

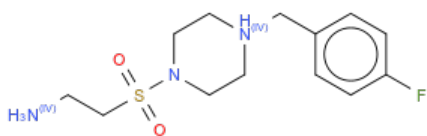

C19688594

108

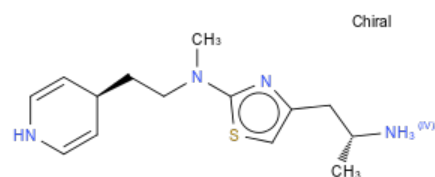

C28509575

109

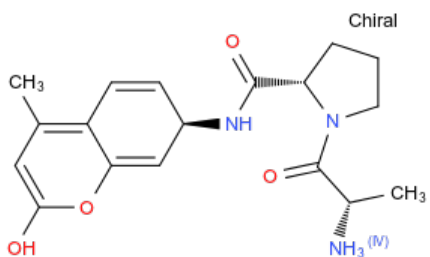

C25667412

110

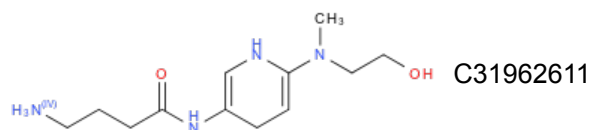

C31962611

111

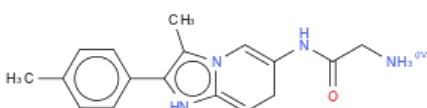

C31958891

112

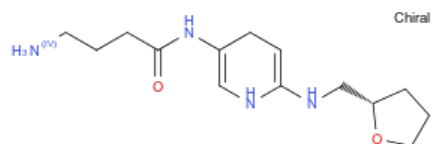

C31960989

113

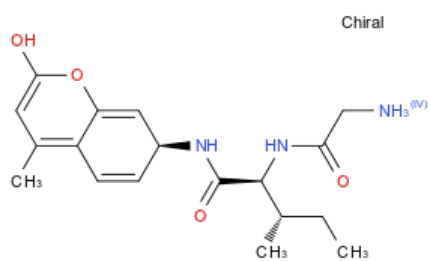

C25667437

114

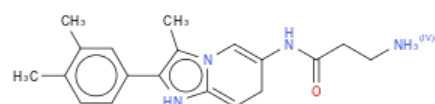

C31958761

115

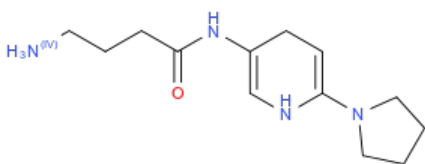

C31962568

116

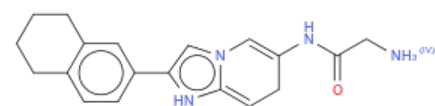

C31958942

117

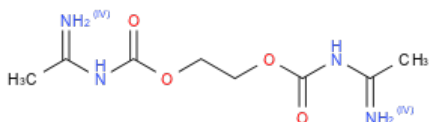

C04769356

118

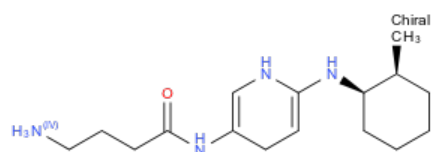

C31961062

119

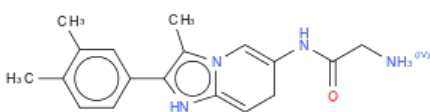

C31958879

120

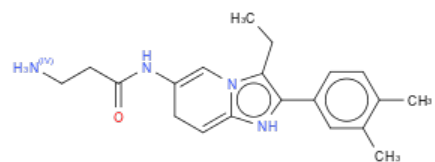

C31958740

121

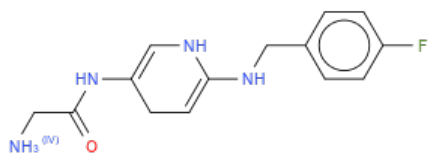

C31961437

122

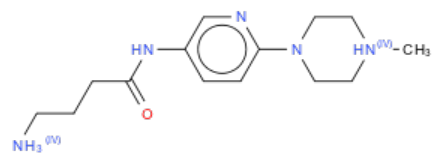

C31962602

123

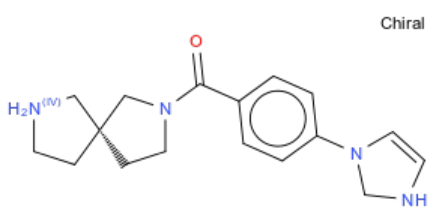

Chiral

C31989945

124

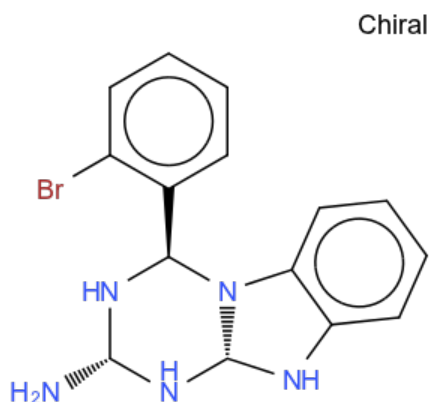

Chiral

C05072156

125

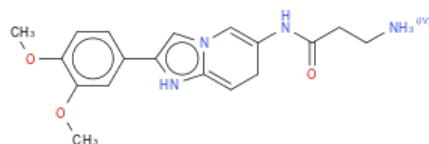

C31958788

126

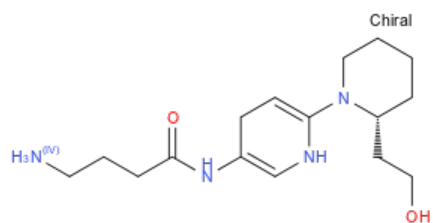

Chiral

C31962516

127

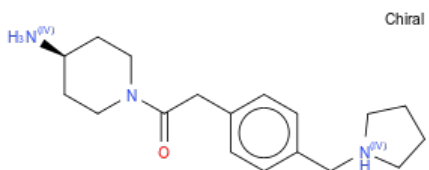

Chiral

C33450295

128

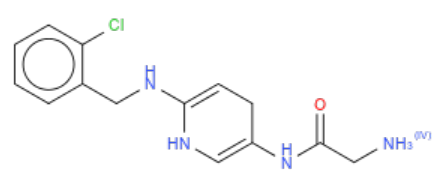

C31961571



129

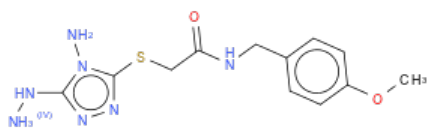

C21035509

130

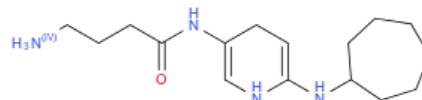

C31960980

131

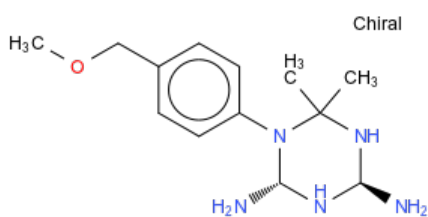

C17039697

132

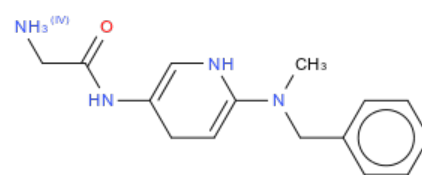

C31962877

133

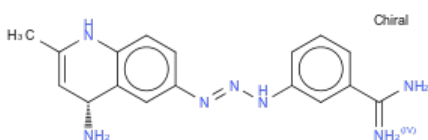

C05758544

134

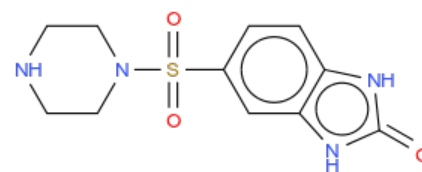

C34781275

135

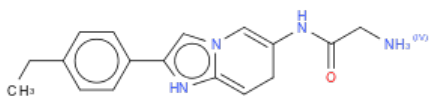

C31958949

136

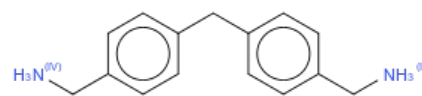

C01574115

137

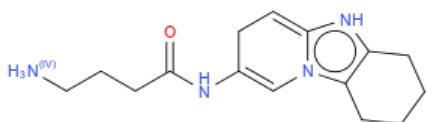

C31958713

138

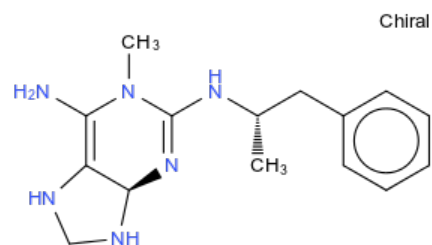

C03984211

139

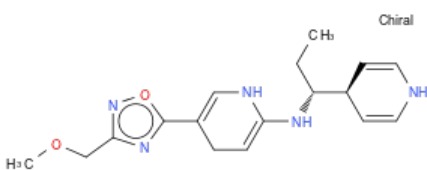

C19952396

140

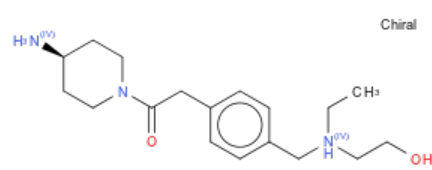

C33460572

141

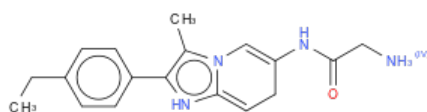

C31958889

142

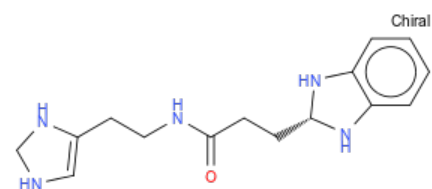

C13626789

143

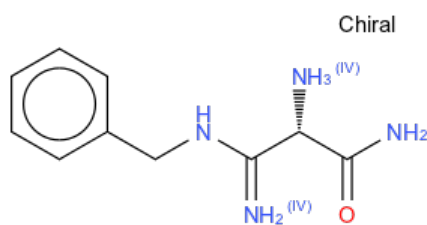

C08652294

144

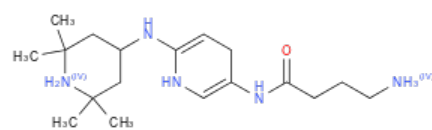

C31961046

145

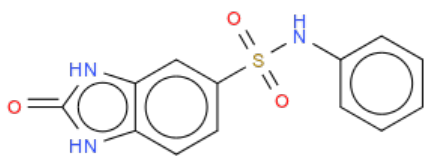

C05012090

146

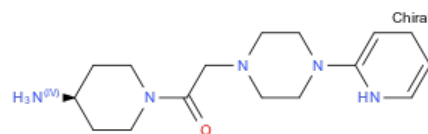

C32074143

147

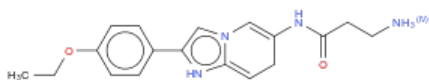

C31958783

148

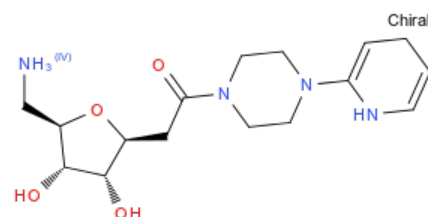

C12603804

149

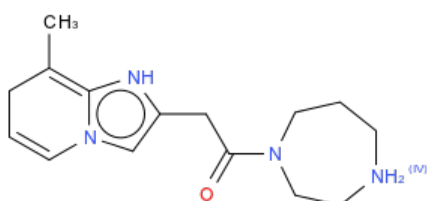

C41292015

150

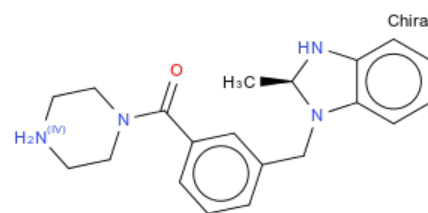

C31946234

151

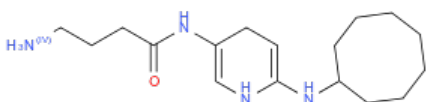

C31960970

152

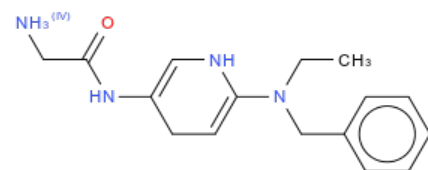

C31962850

153

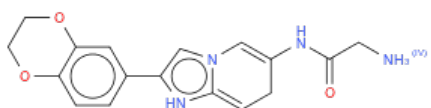

C31958958

154

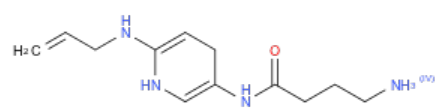

C31960960

155

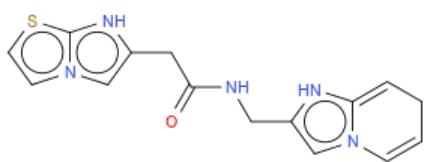

C08278825

156

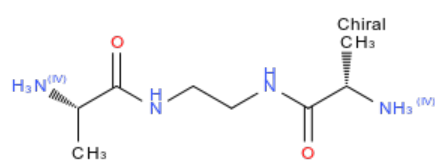

C01616444

157

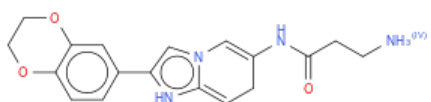

C31958798

158

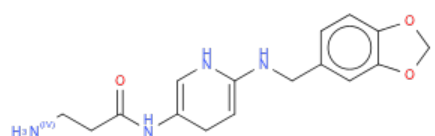

C31961212

159

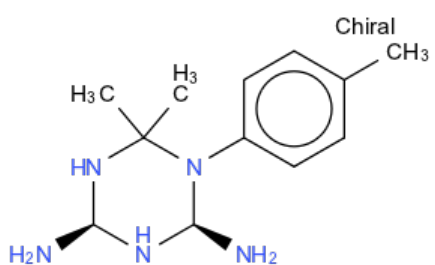

C17040529

160

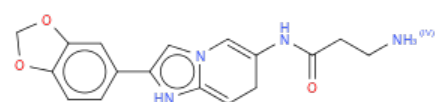

C31958803

161

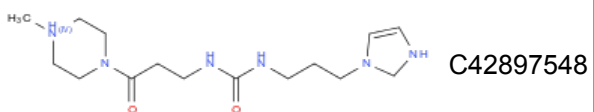

162

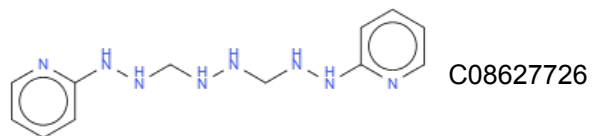

163

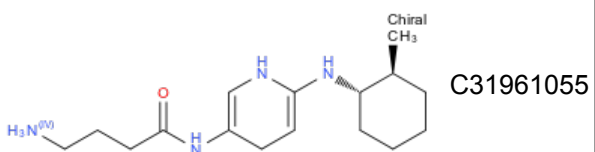

164

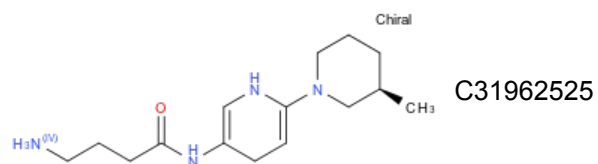

165

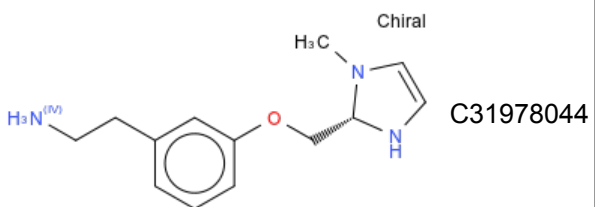

166

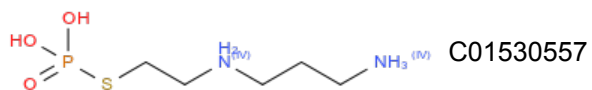

167

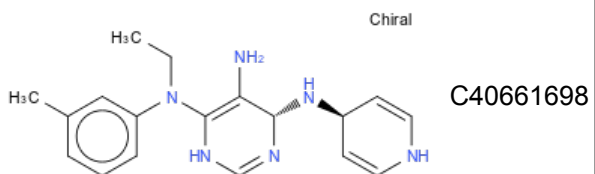

168

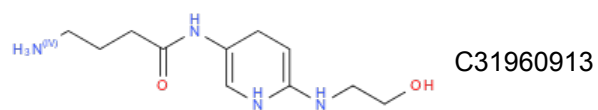

169

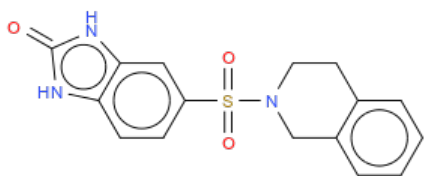

C07667606

170

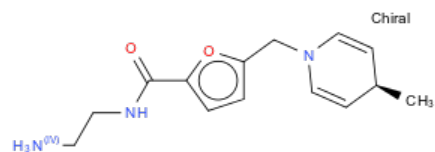

C31947123

171

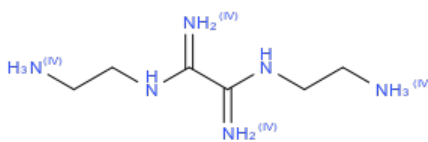

C05187976

172

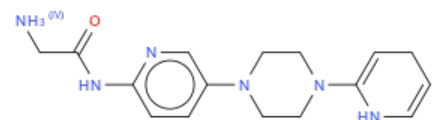

C31961806

173

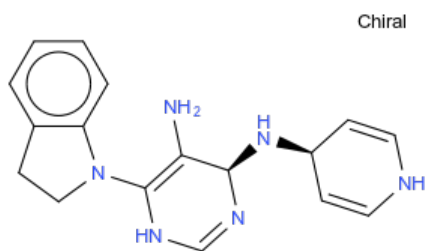

C40687252

174

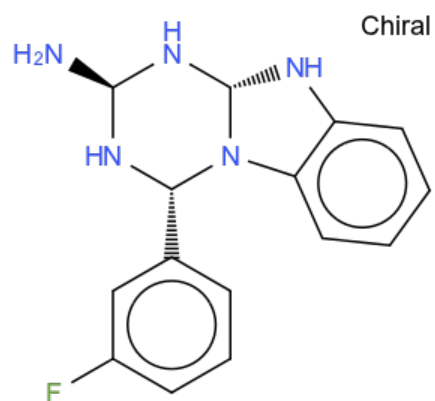

C04385815

175

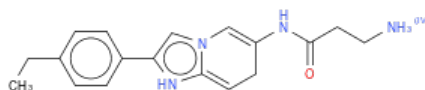

C31958794

176

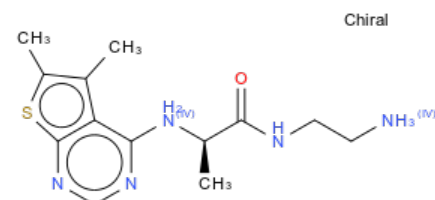

C31946191

177

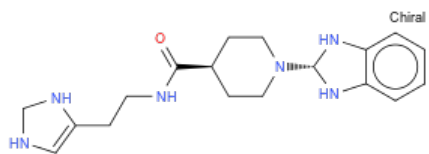

C33070960

178

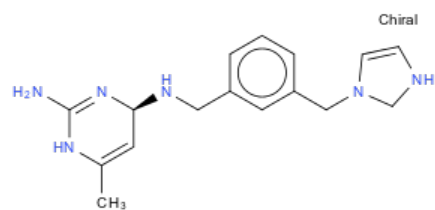

C42098271

179

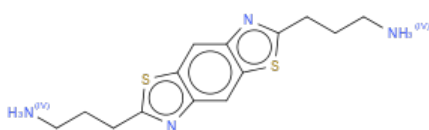

C02981216

180

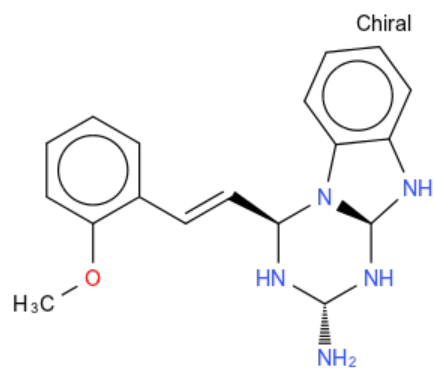

C07738694

181

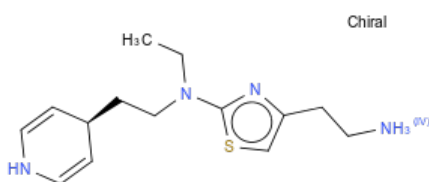

C20185310

182

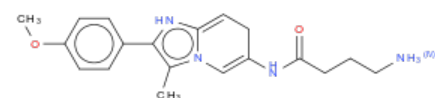

C31958697

183

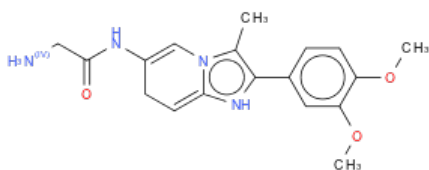

C31958875

184

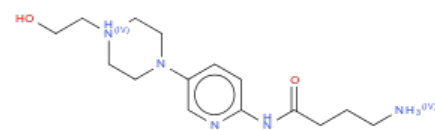

C31962440

Table S2

185

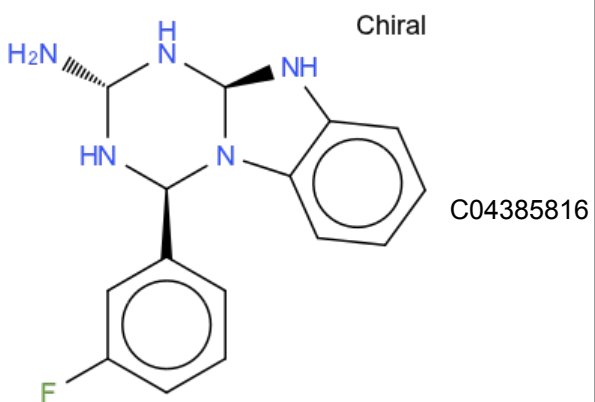

186

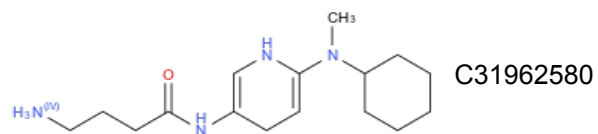

187

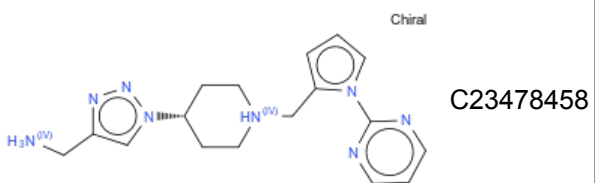

188

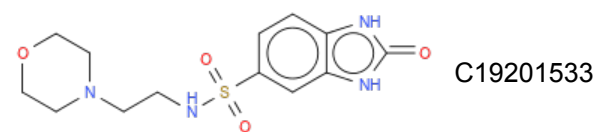

189

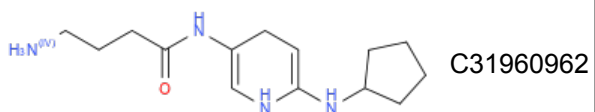

190

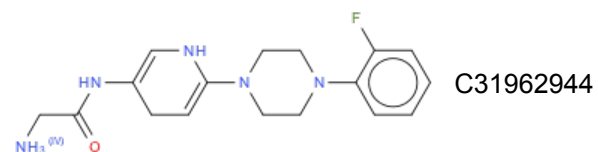

191

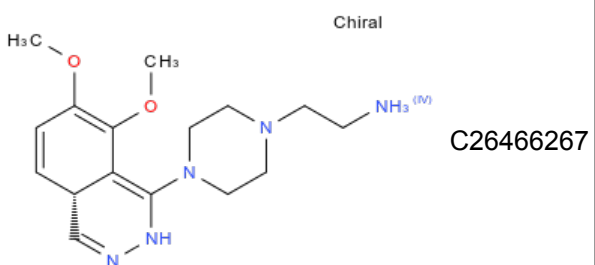

192

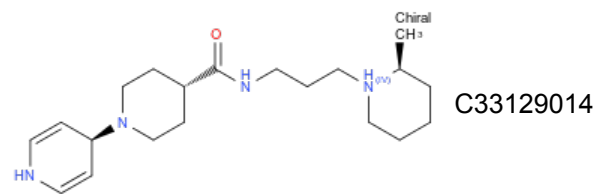



193

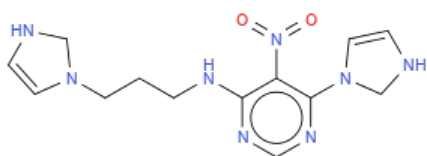

C40661446

194

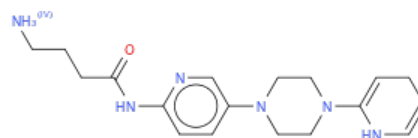

C31962431

195

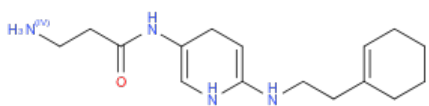

C31961268

196

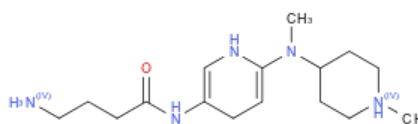

C31962594

197

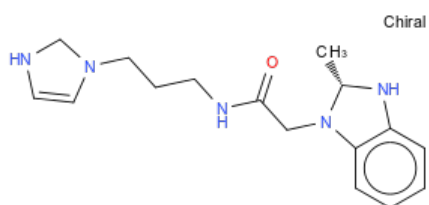

C04625587

198

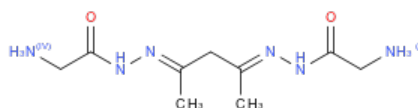

C17058734

199

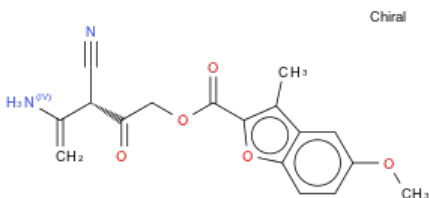

C03303352

200

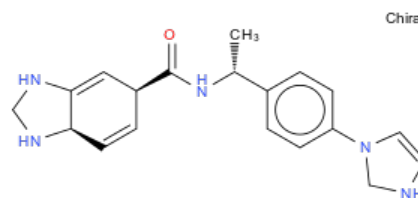

C12550946

201

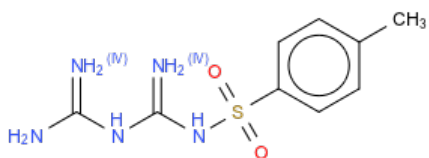

C04430096

202

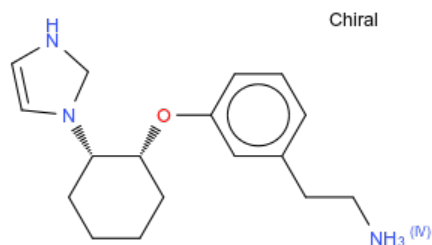

C31978045

203

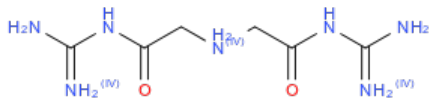

C05368763

204

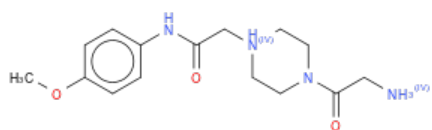

C19687602

205

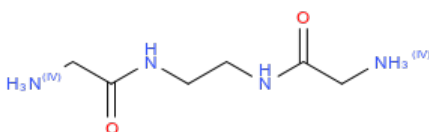

C06157424

206

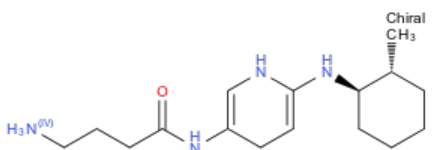

C31961059

207

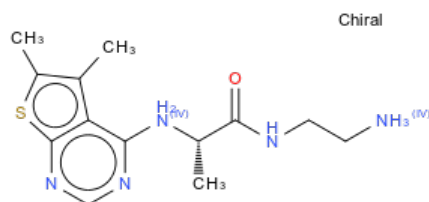

C31946192

208

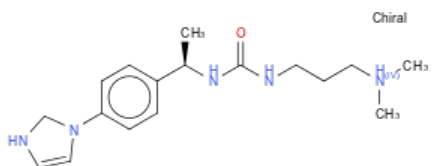

C42923697

209

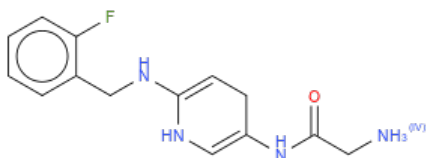

C31961556

210

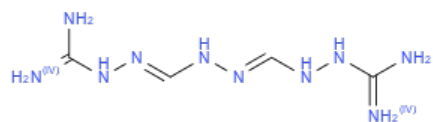

C17352657

211

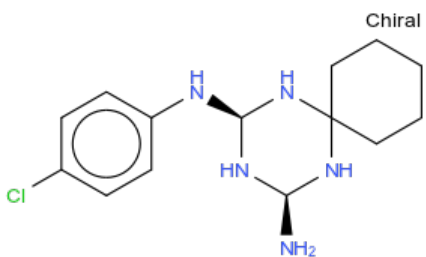

C00203755

212

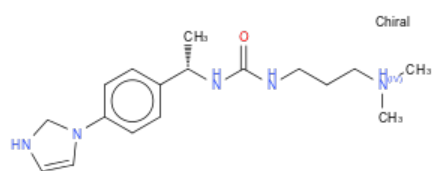

C42923694

213

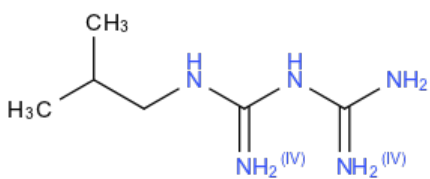

C03954417

214

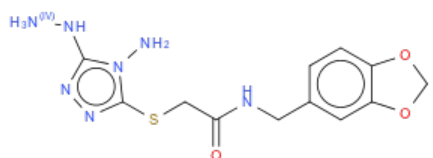

C21035782

215

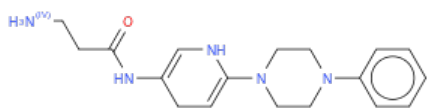

C31962679

216

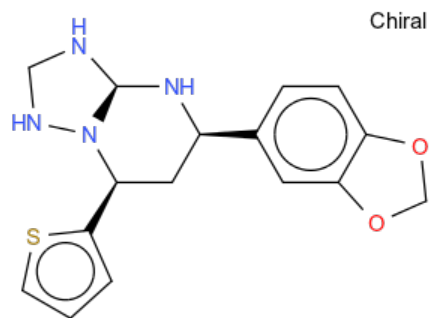

C00221745

217

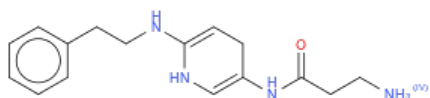

C31961186

218

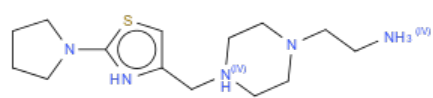

C26471277

219

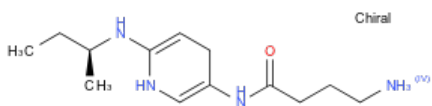

C31960911

220

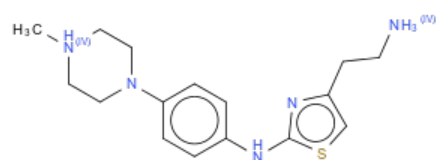

C20185546

221

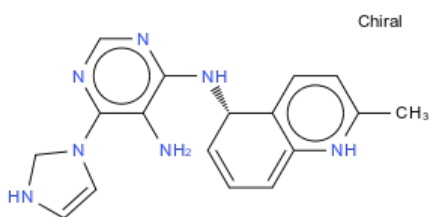

C40802333

222

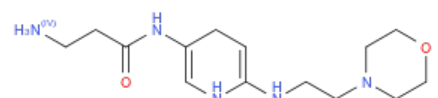

C31961195

223

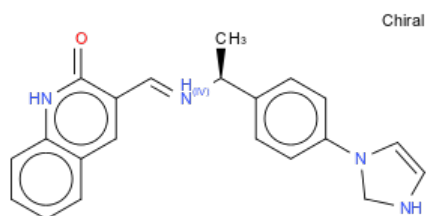

C27062276

224

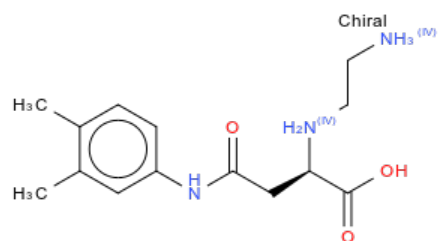

C39715053

225

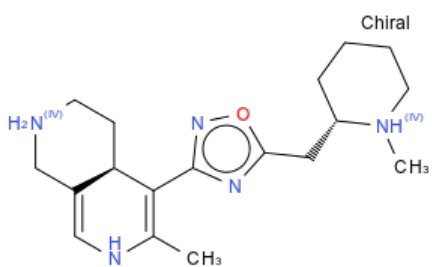

C20233775

226

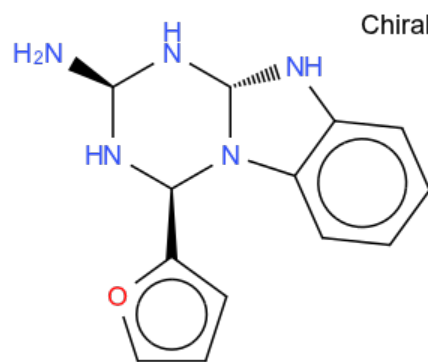

C09015915

227

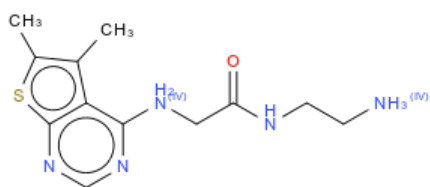

C31946489

228

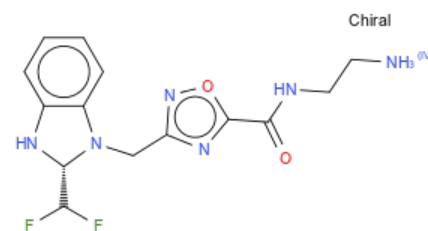

C12398395

229

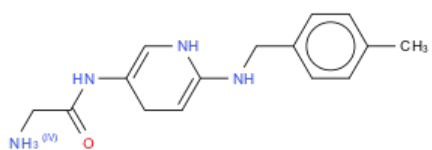

C31961443

230

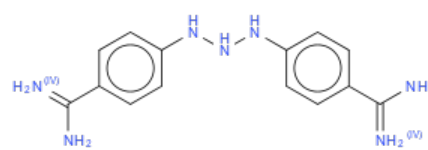

C13544703

231

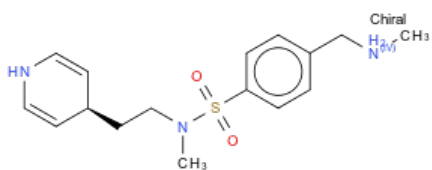

C20188264

232

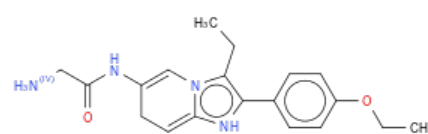

C31958822

233

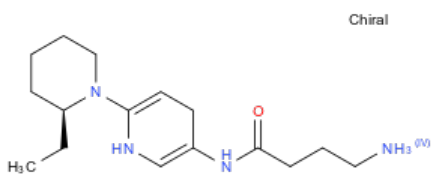

C31962512

234

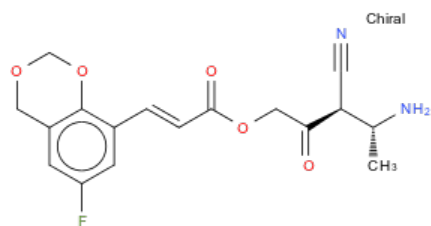

C17250947

235

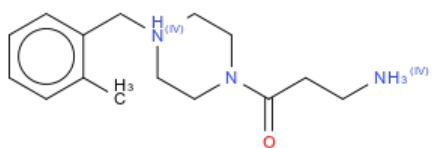

C19687972

236

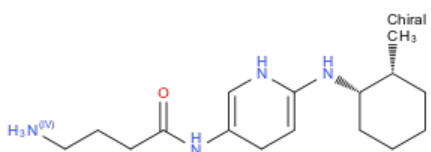

C31961051

237

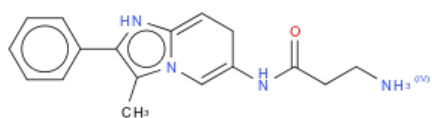

C31958772

238

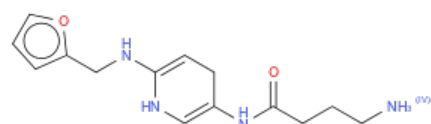

C31960939

239

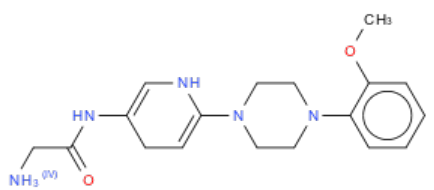

C31962764

240

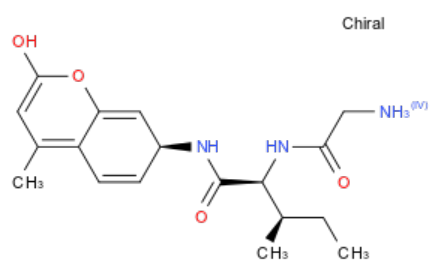

C25667430

241

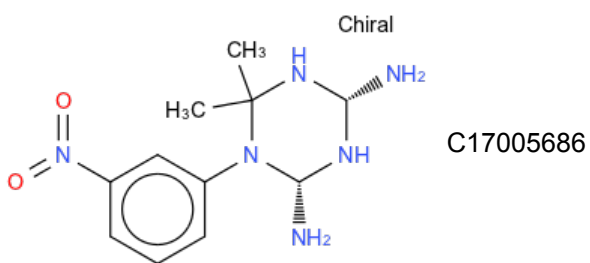

242

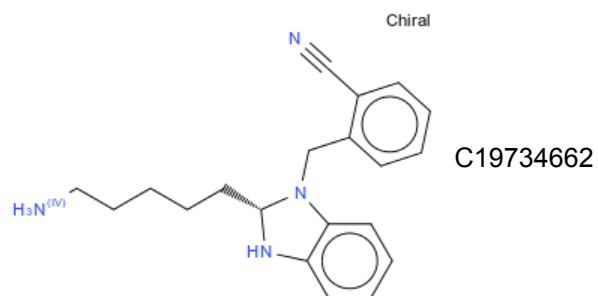

243

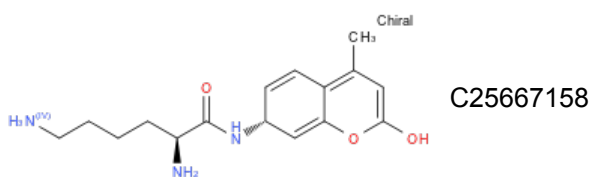

244

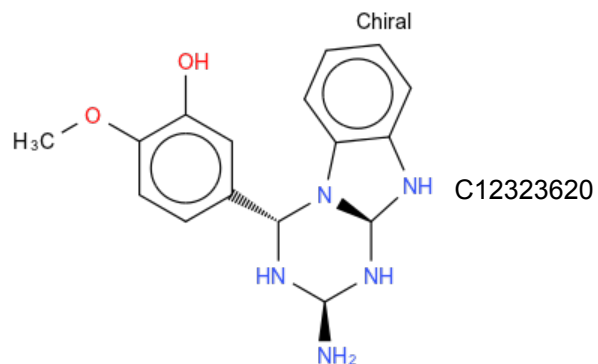

245

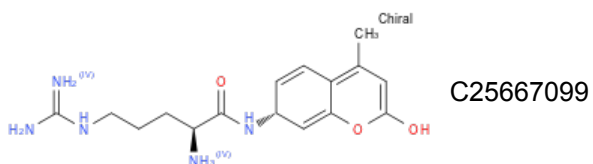

246

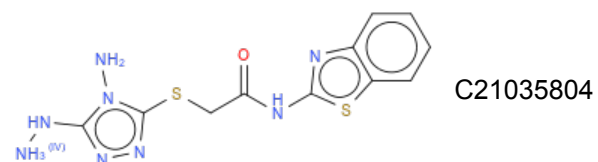

247

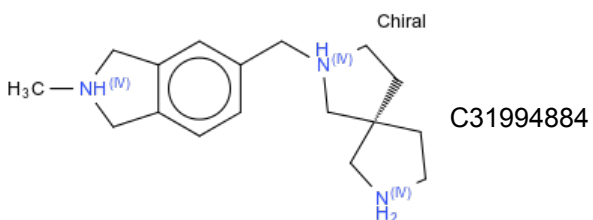

248

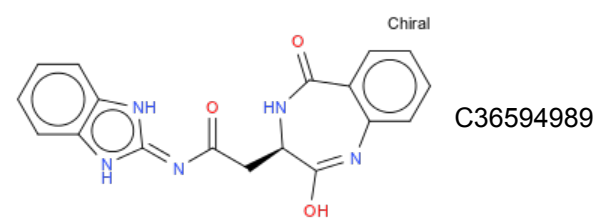

249

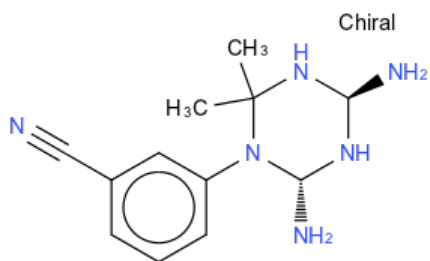

C17428337

250

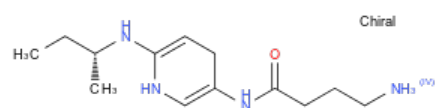

C31960909

251

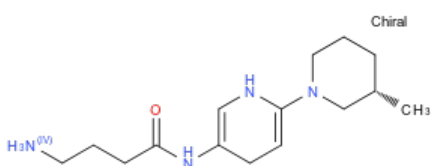

C31962528

252

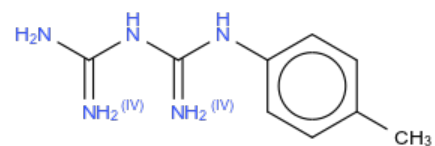

C00089464

253

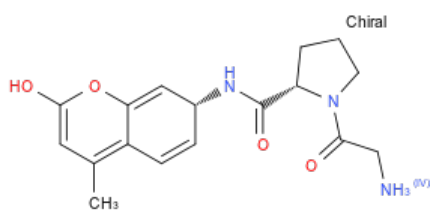

C25667357

254

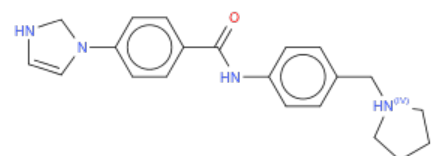

C30606166

255

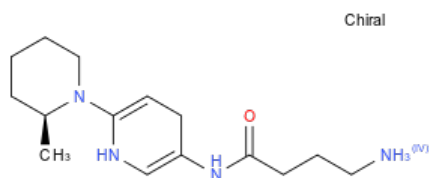

C31962577

256

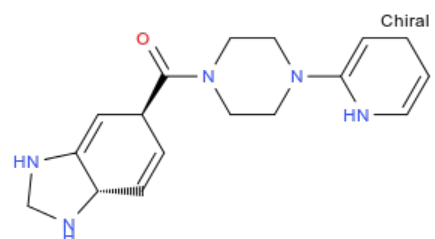

C12323621



257

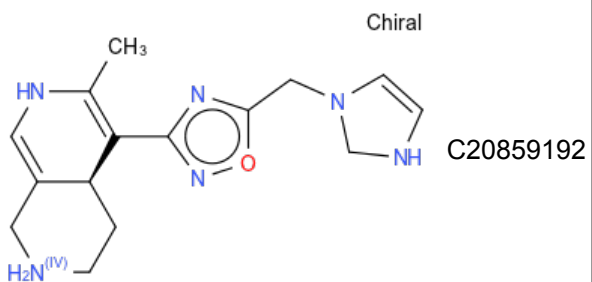

258

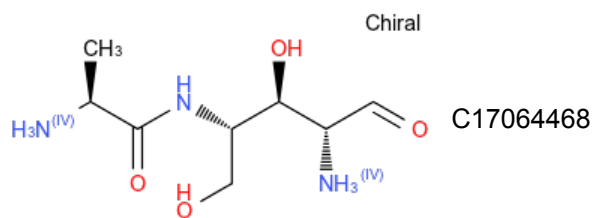

259

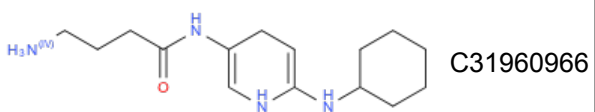

260

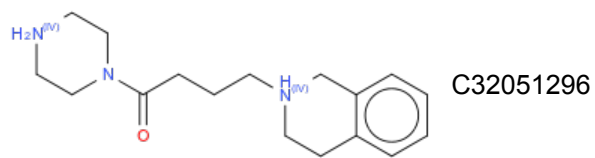

261

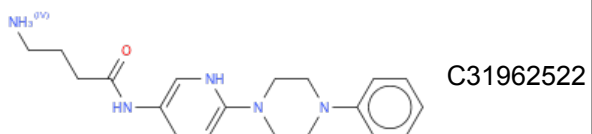

262

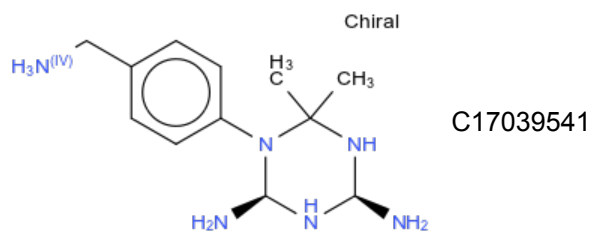

263

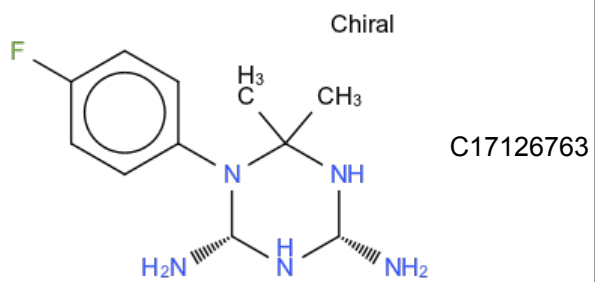

264

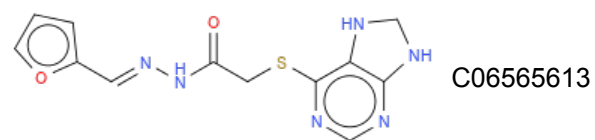

265

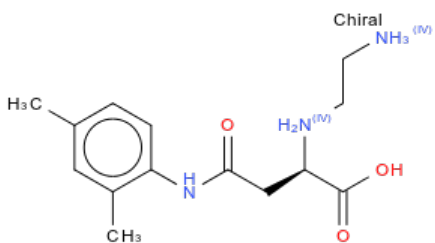

C39715051

266

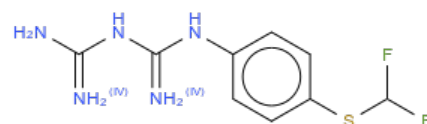

C00351509

267

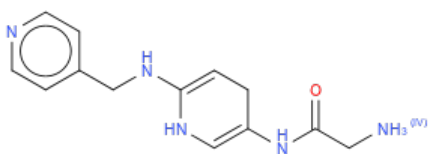

C31961458

268

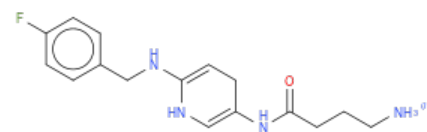

C31961002

269

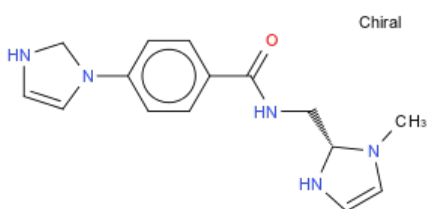

C41570745

270

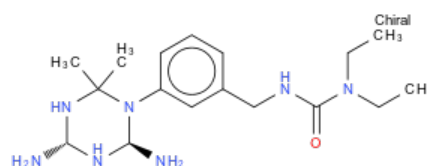

C16956089

271

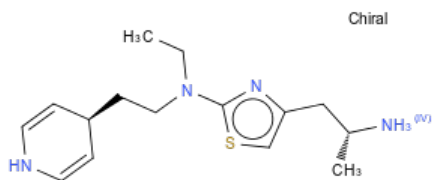

C28509580

272

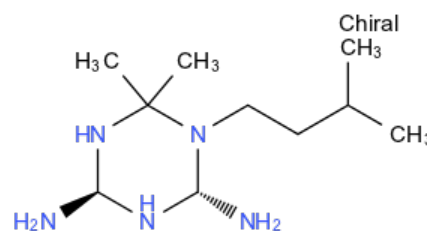

C17040316

273

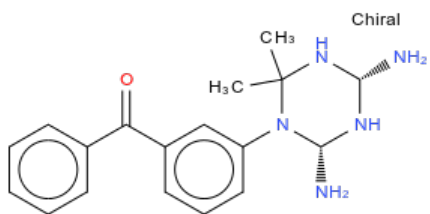

C17025539

274

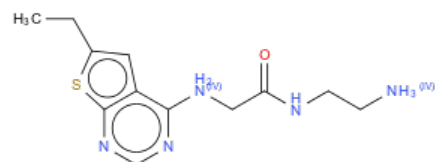

C31946476

275

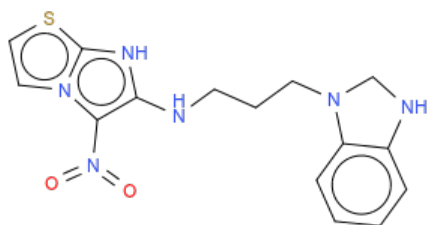

C08374779

276

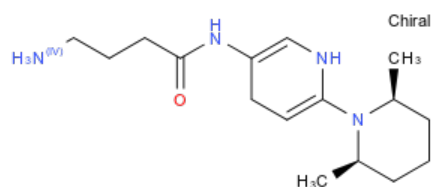

C31962539

277

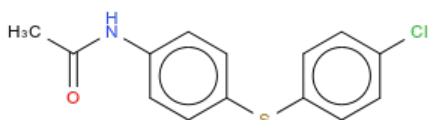

C00393537

278

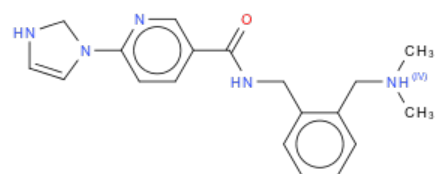

C25248783

279

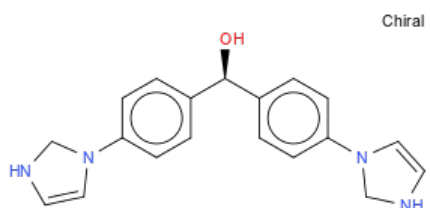

C01395759

280

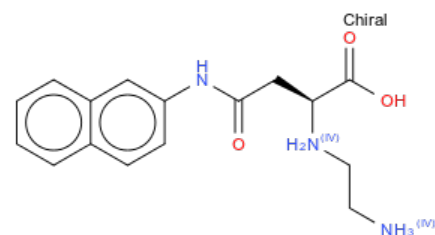

C39918460

281

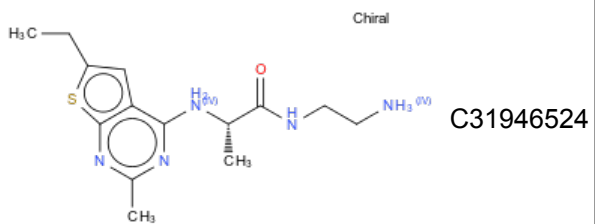

282

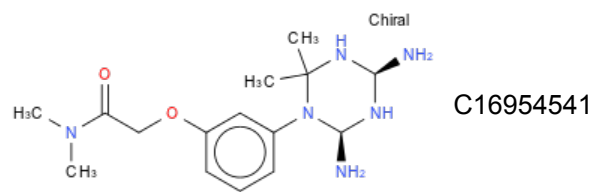

283

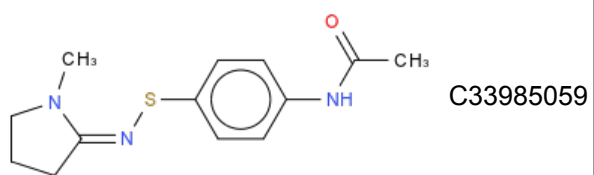

284

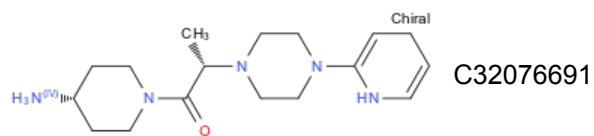

285

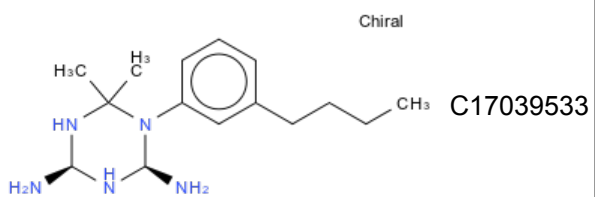

286

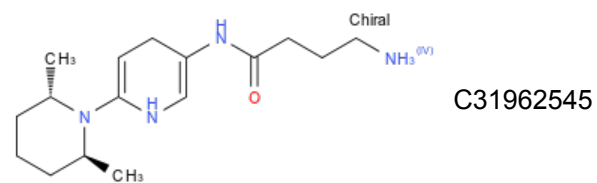

287

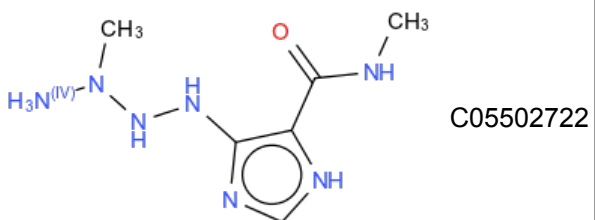

288

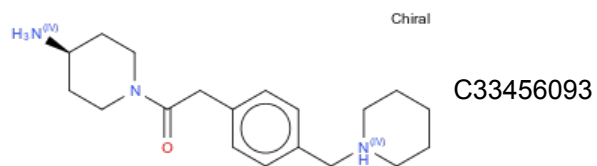

289

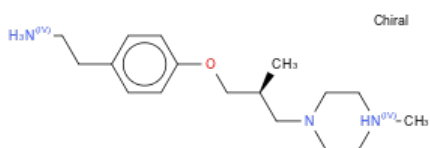

C31978085

290

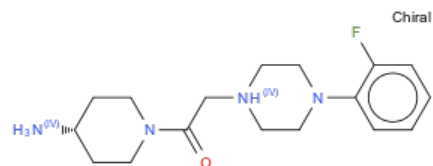

C32077315

291

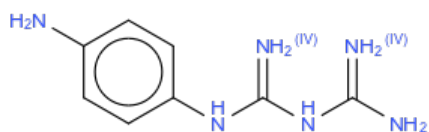

C04707034

292

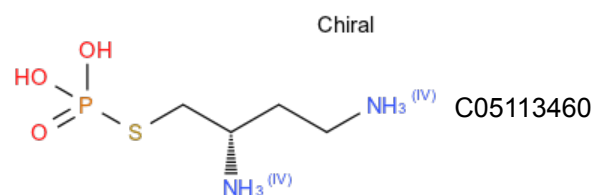

C05113460

293

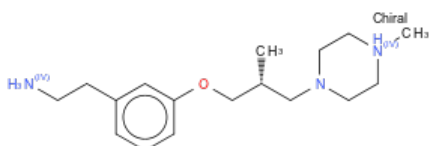

C31978054

294

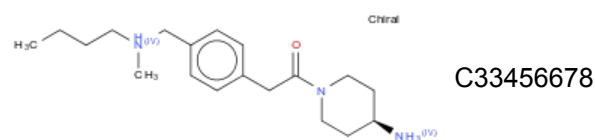

C33456678

295

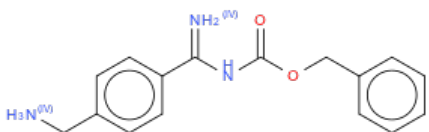

C19372700

296

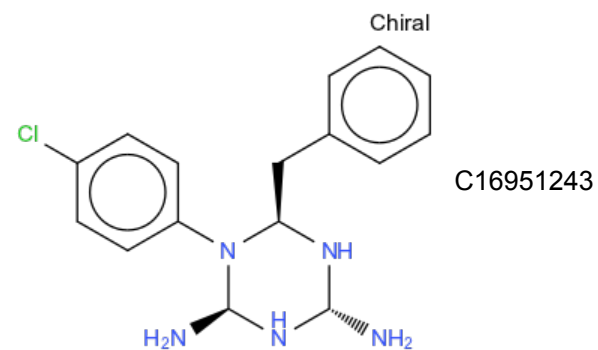

C16951243

297

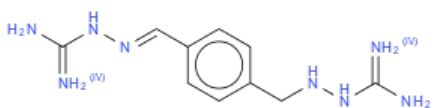

C16051245

298

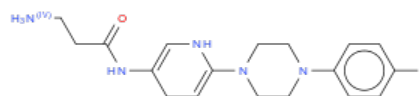

C31962630

299

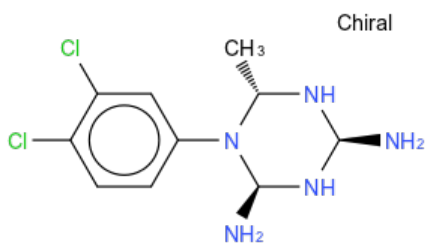

C17353521

300

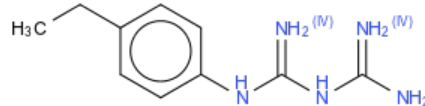

C00073405

301

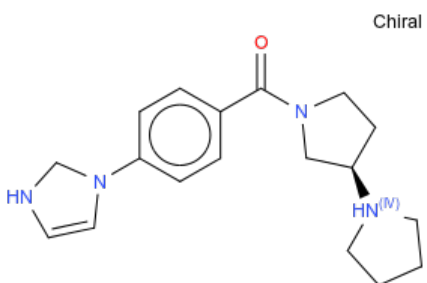

C41570801

302

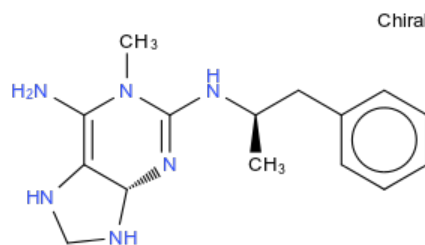

C03984212

303

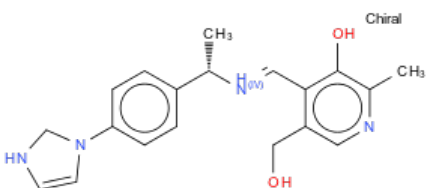

C05110872

304

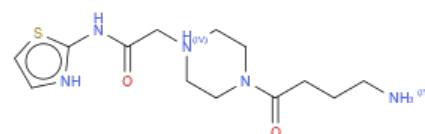

C19688069

305

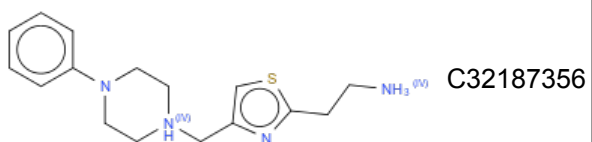

C32187356

306

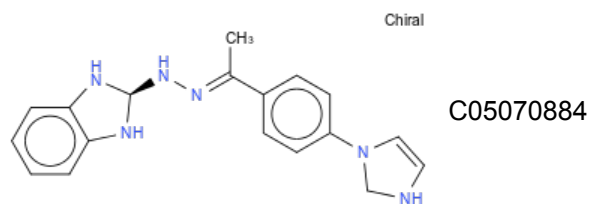

C05070884

307

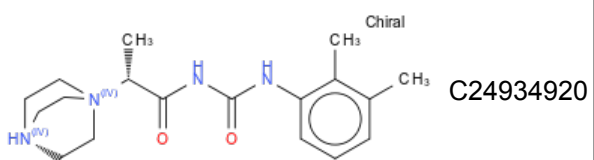

C24934920

308

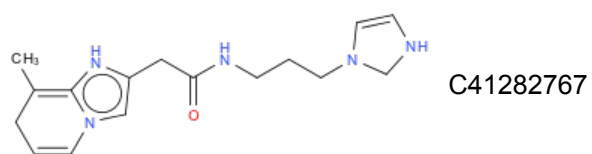

C41282767

309

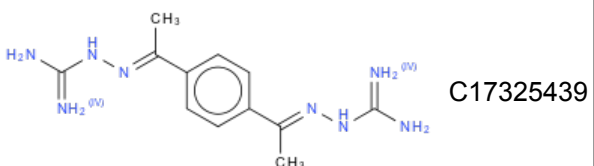

C17325439

310

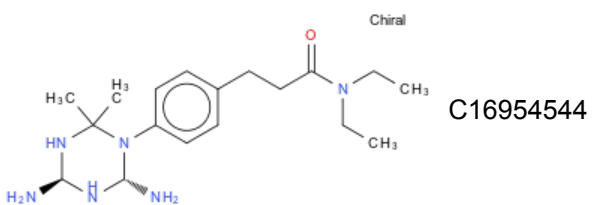

C16954544

311

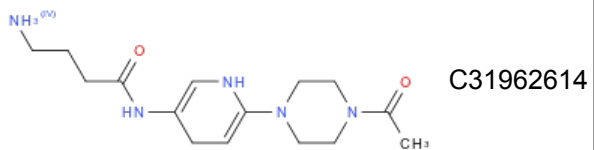

C31962614

312

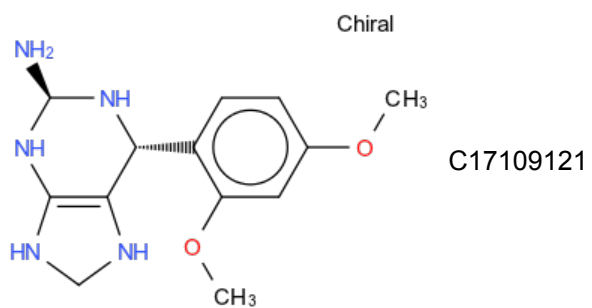

C17109121

313

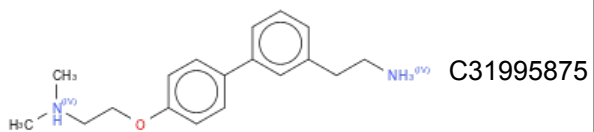

314

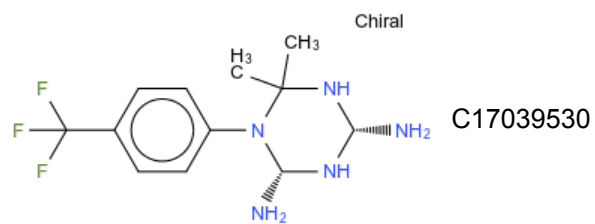

315

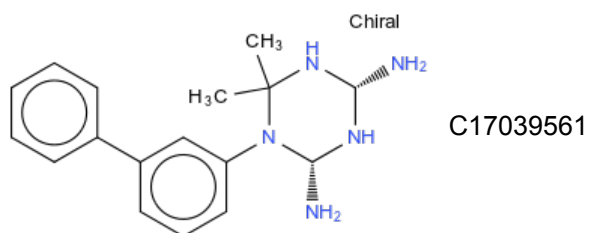

316

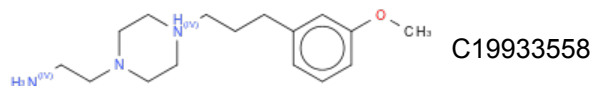

317

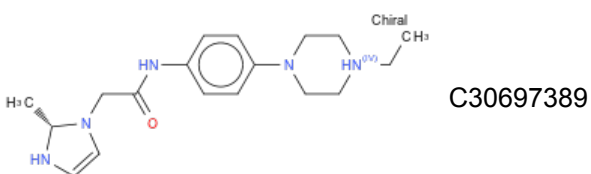

318

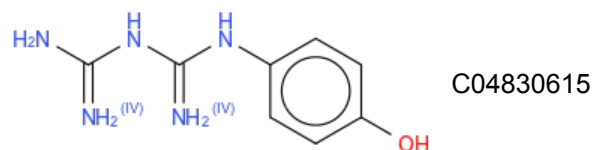

319

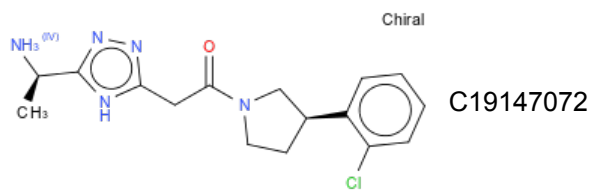

320

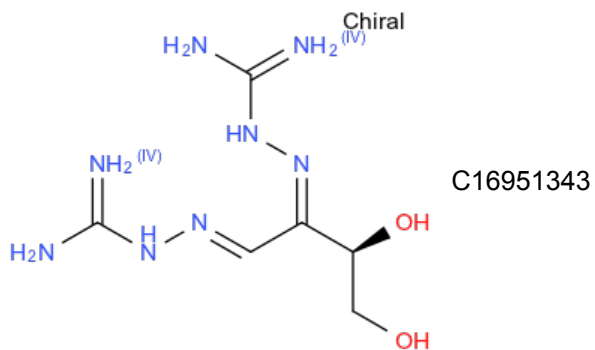



321

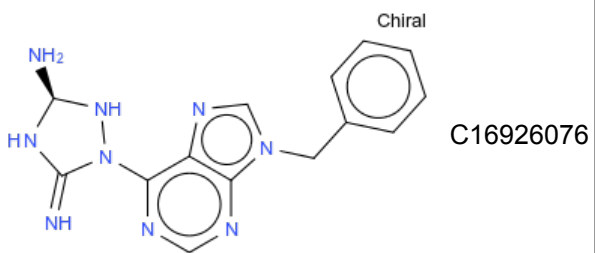

322

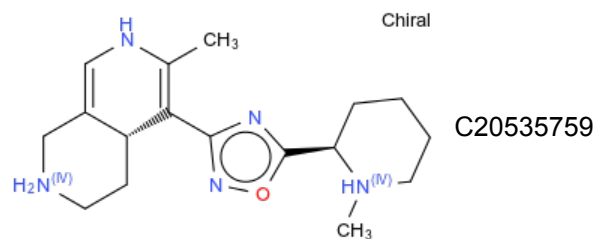

323

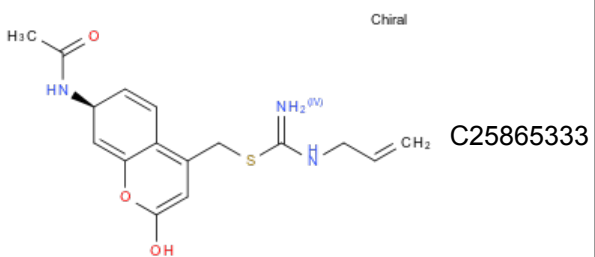

324

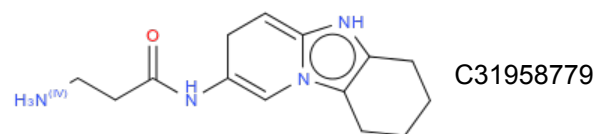

325

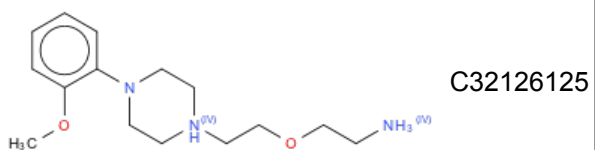

326

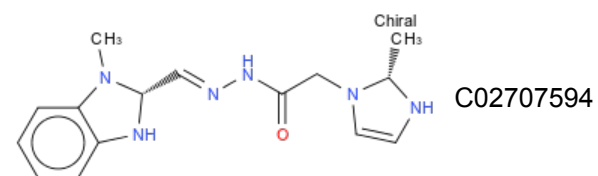

327

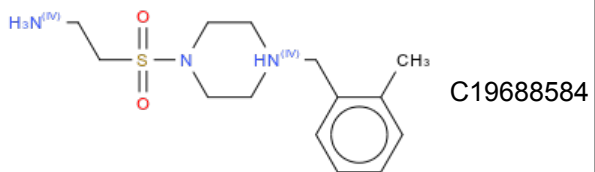

328

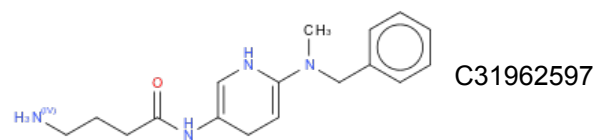

329

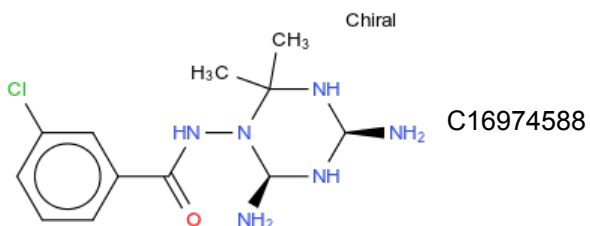

330

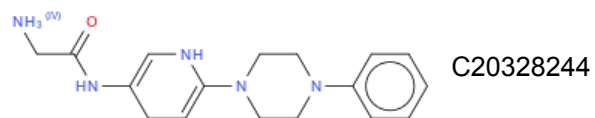

331

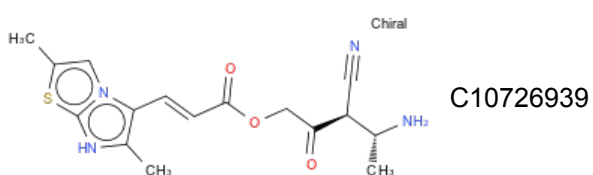

332

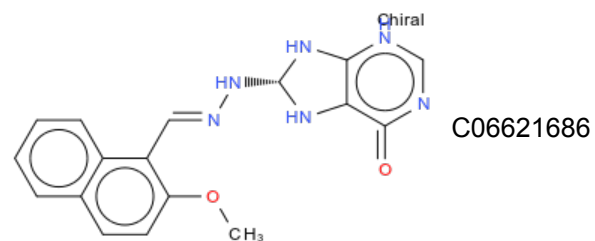

333

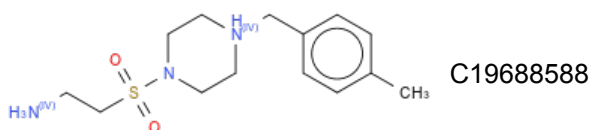

334

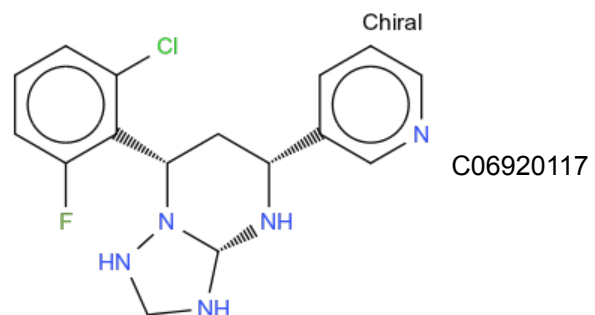

335

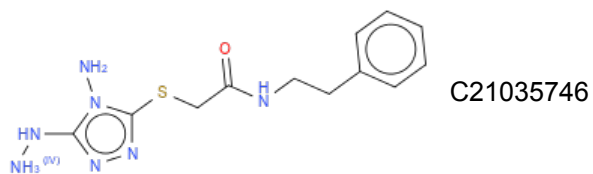

336

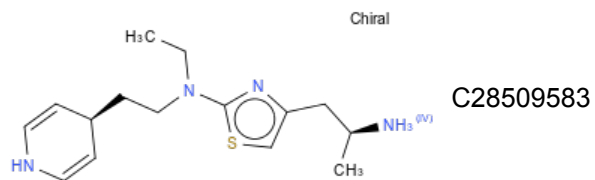

337

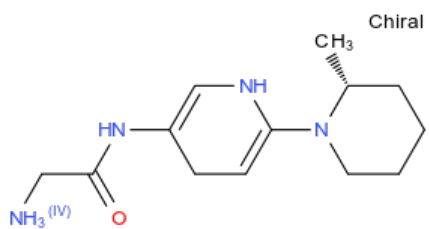

C31962858

338

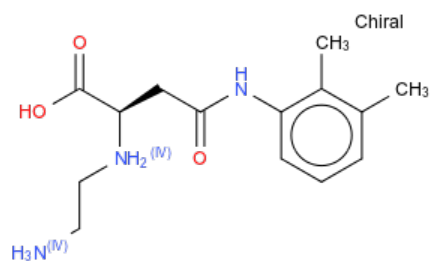

C39715049

339

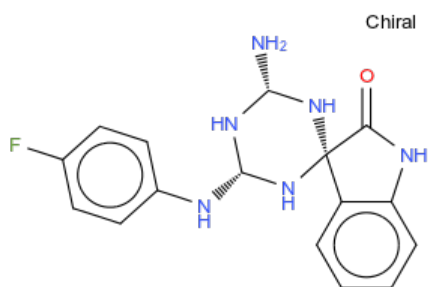

C19327173

340

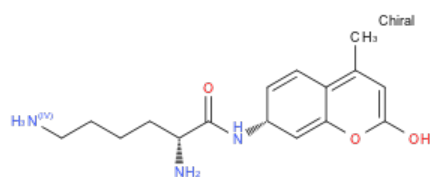

C25667165

341

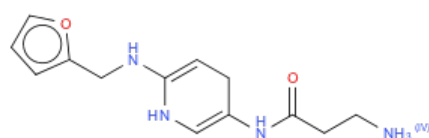

C31961150

342

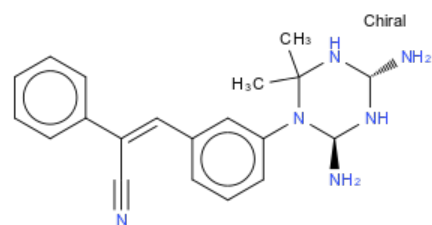

C17040054

343

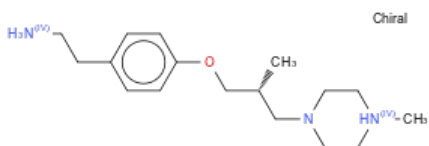

C31978084

344

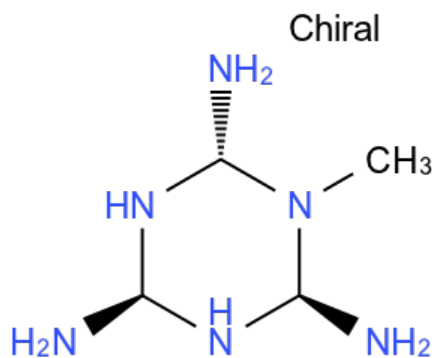

C08614354

345

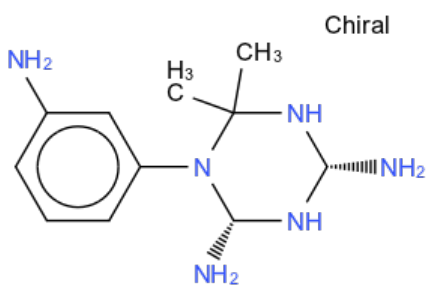

346

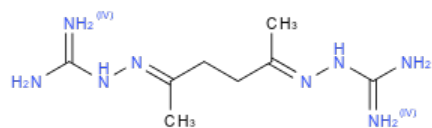

347

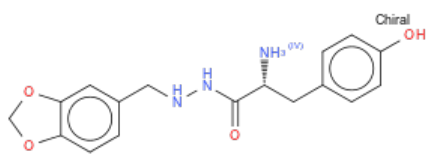

348

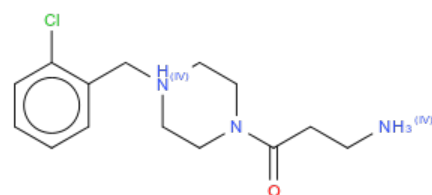

349

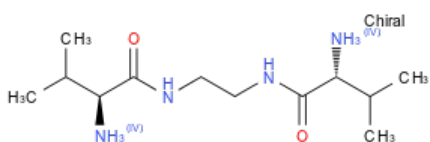

350

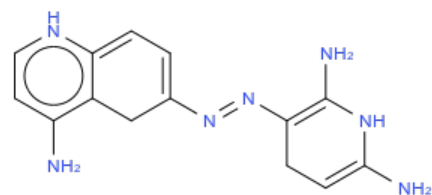

351

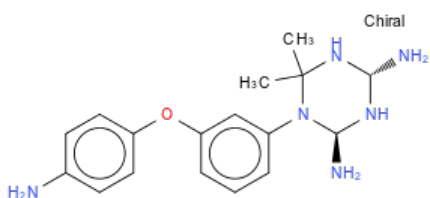

352

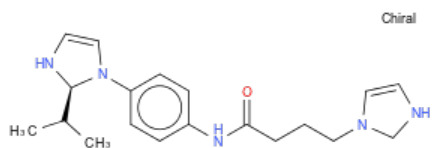

353

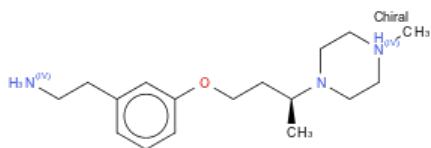

C31978058

354

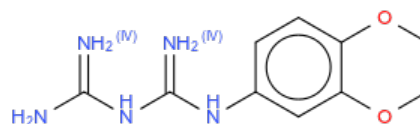

C03905243

355

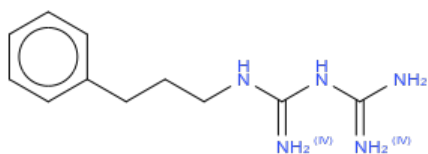

C05053183

356

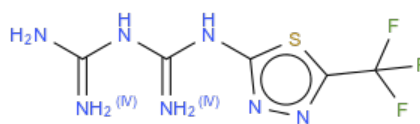

C04376246

357

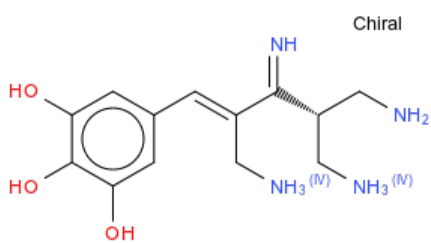

C27646839

358

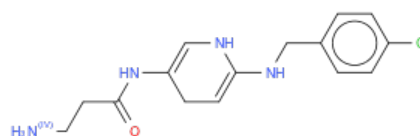

C31961271

359

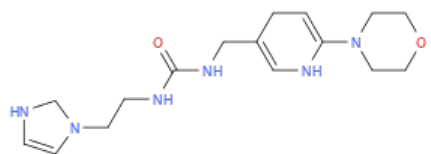

C30989574

360

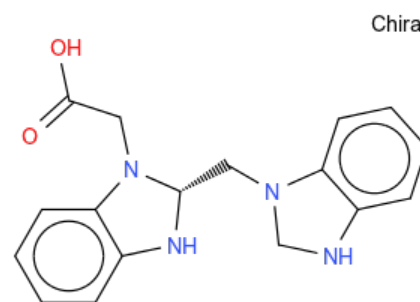

C08715640

361

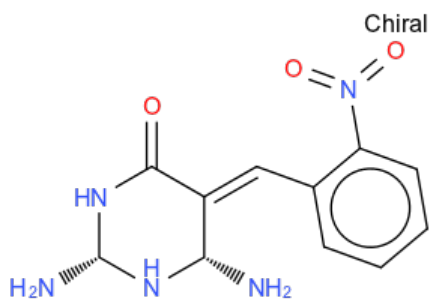

C08656019

362

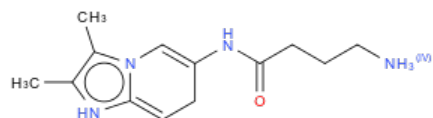

C31958730

363

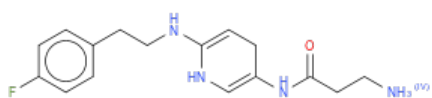

C31961282

364

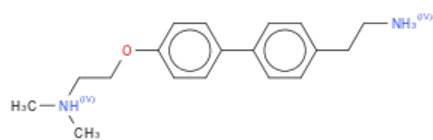

C31995872

365

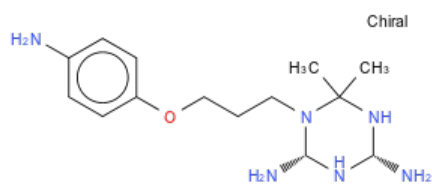

C08628925

366

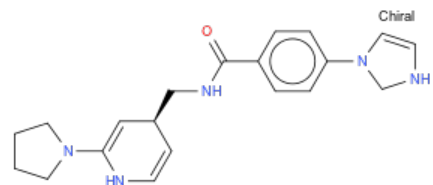

C30603491

367

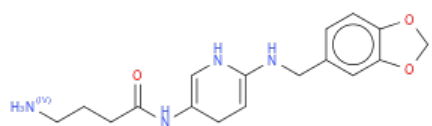

C31961009

368

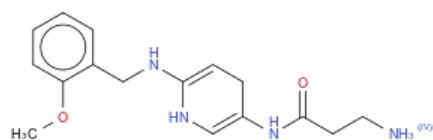

C31961215

369

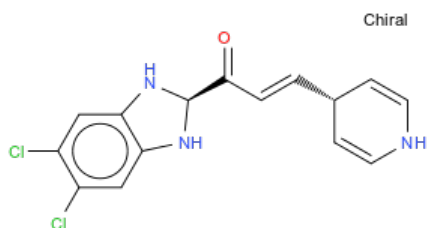

C05401140

370

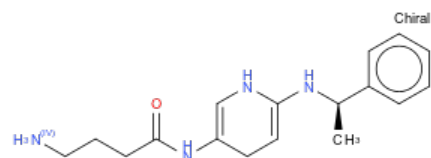

C31961020

371

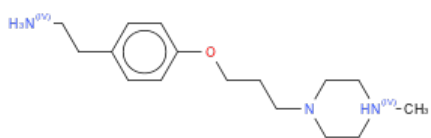

C31978081

372

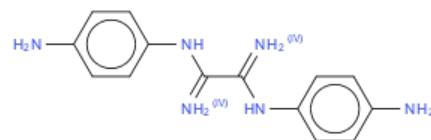

C05011412

373

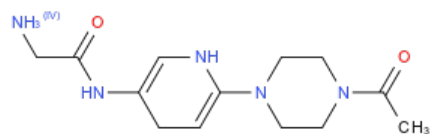

C31962904

374

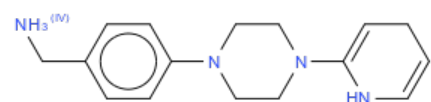

C19865486

375

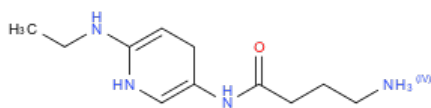

C31960943

376

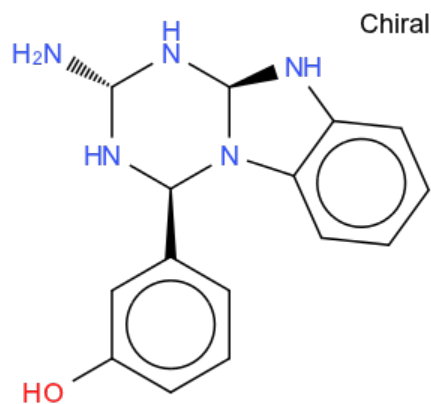

C04005136

377

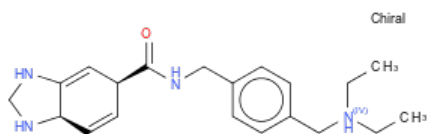

C14094728

378

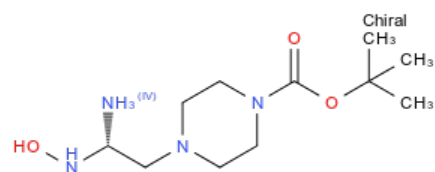

C22405376

379

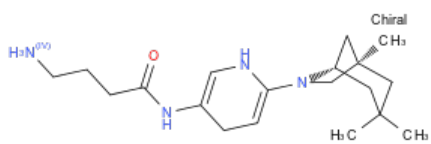

C31962626

380

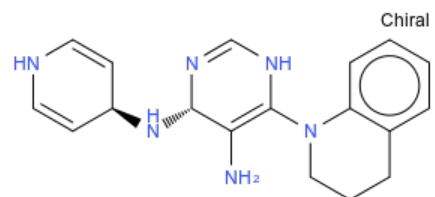

C40687587

381

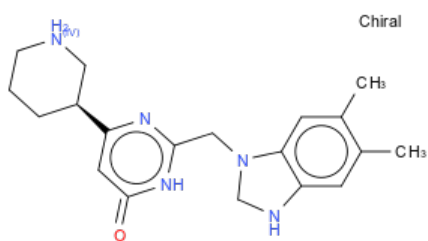

C23580863

382

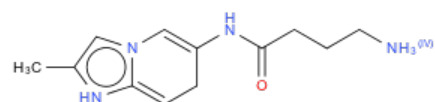

C31958710

383

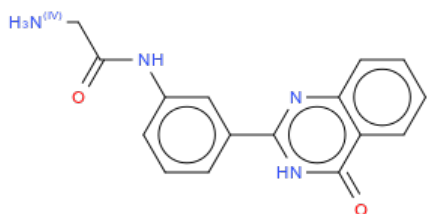

C40819598

384

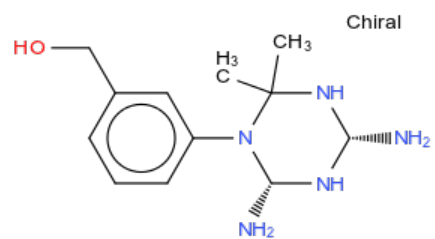

C17040297



385

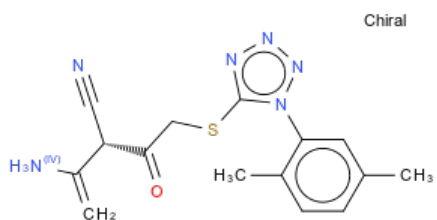

386

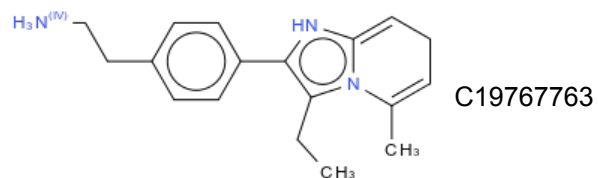

387

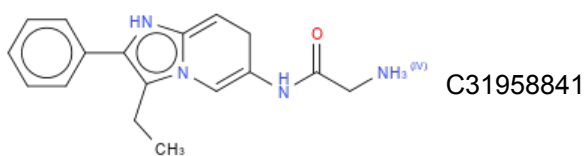

388

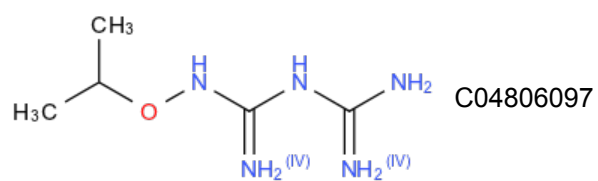

389

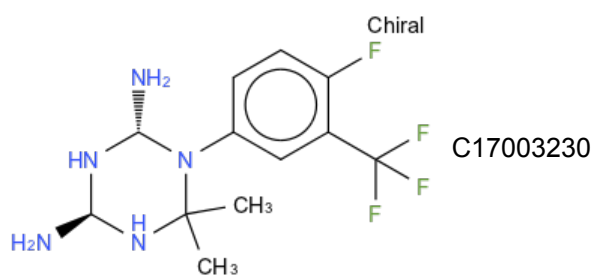

390

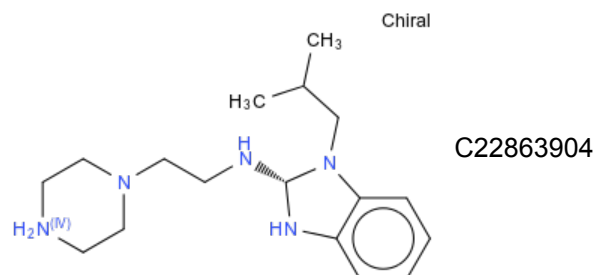

391

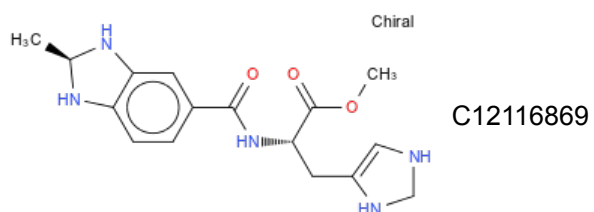

392

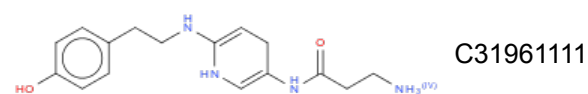

393

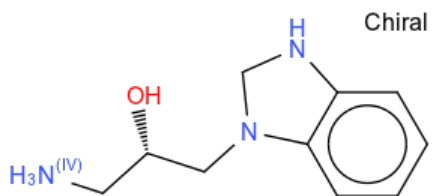

C06677935

394

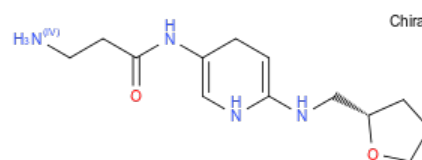

C31961200

395

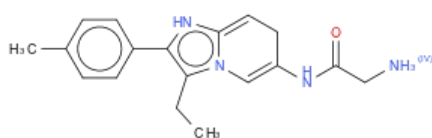

C31958837

396

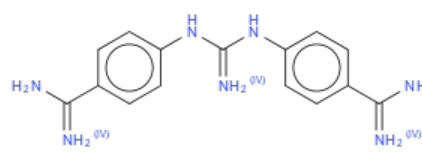

C05390186

397

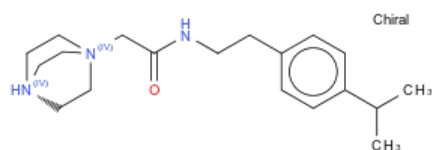

C29224697

398

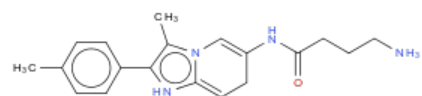

C31958703

399

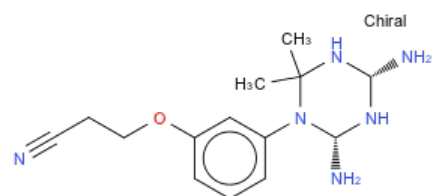

C17040027

400

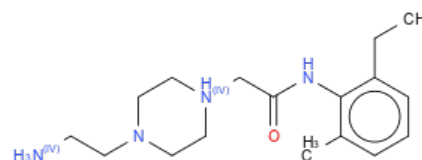

C19688154

401

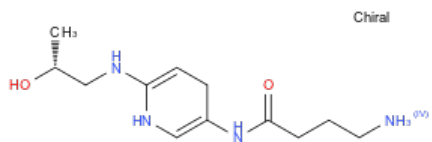

C31960929

402

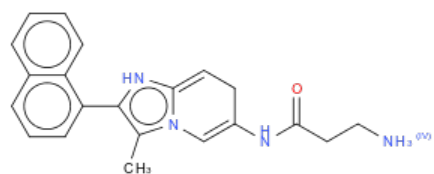

C31958751

403

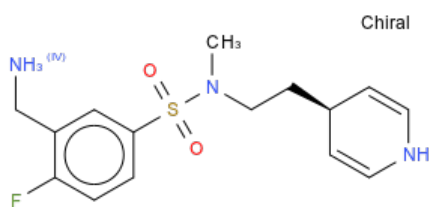

C20189171

404

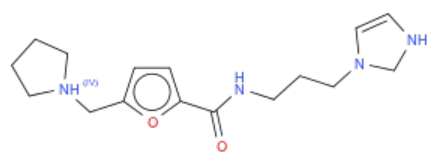

C27984415

405

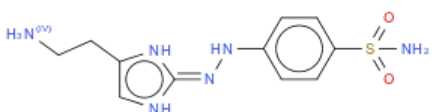

C04772363

406

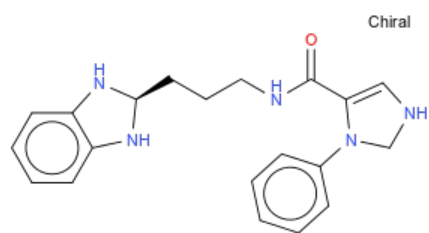

C11486116

407

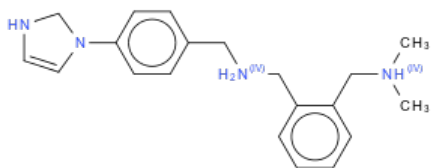

C15185886

408

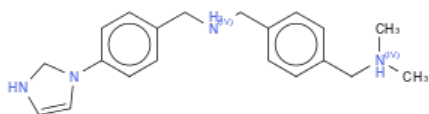

C17319498

409

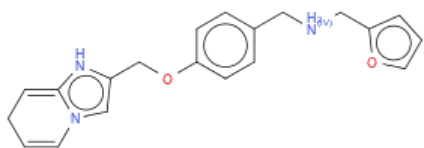

C15566105

410

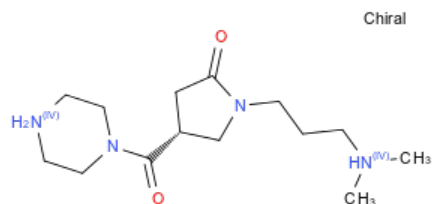

C32050289

411

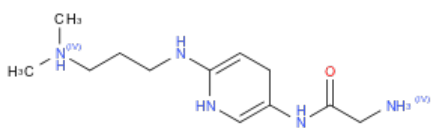

C31961482

412

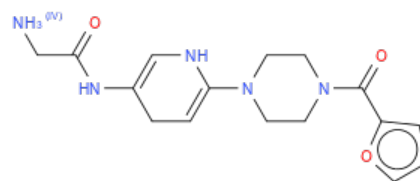

C31962941

413

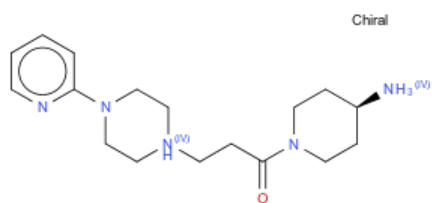

C32072296

414

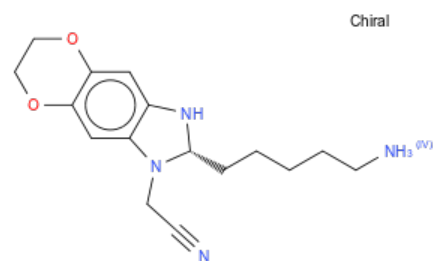

C19753420

415

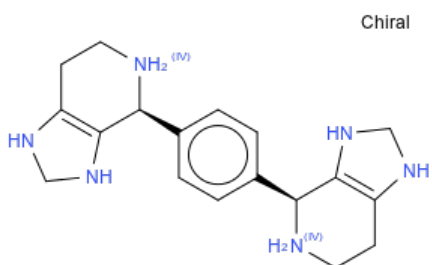

C13284785

416

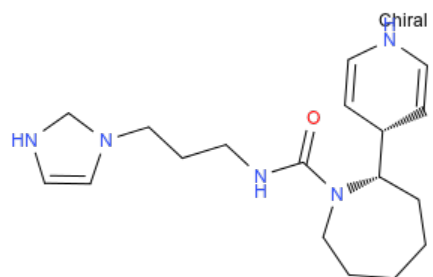

C42897922

417

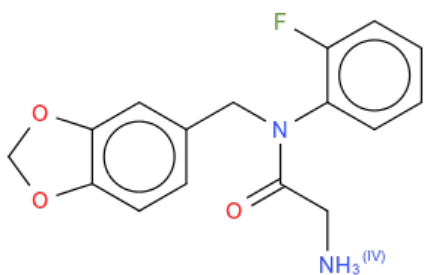

C32187085

418

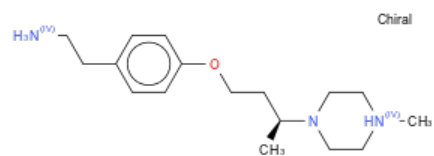

C31978088

419

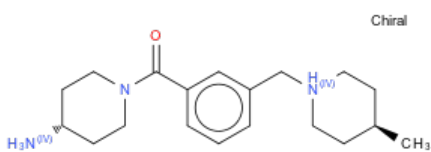

C33456078

420

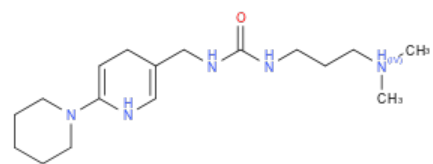

C42922108

421

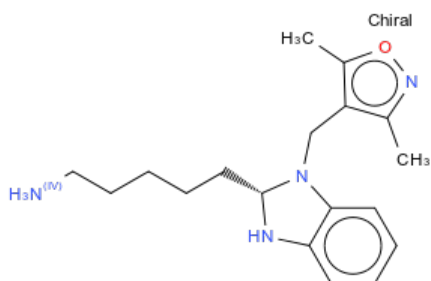

C19734687

422

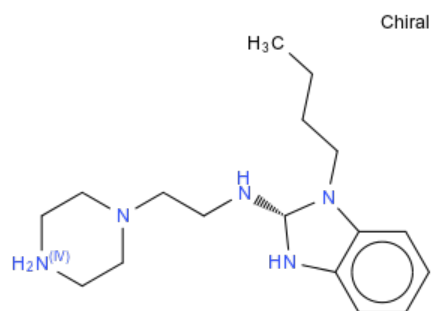

C22878512

423

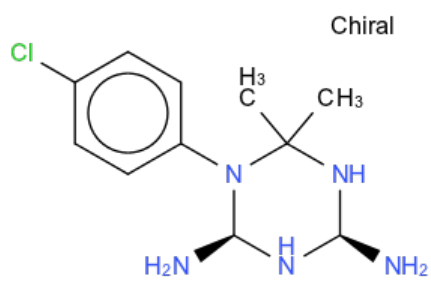

C08579846

424

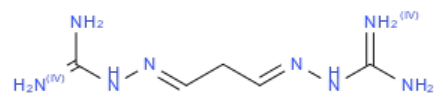

C13537569

425

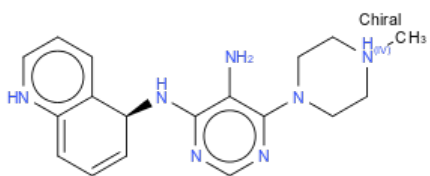

C40726390

426

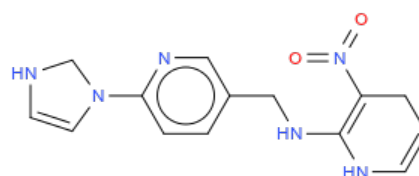

C12629522

427

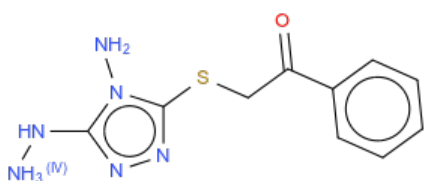

C20509034

428

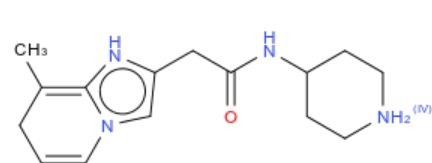

C41292021

429

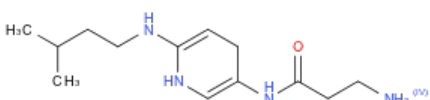

C31961292

430

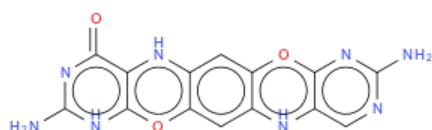

C08648307

431

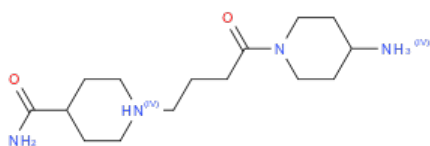

C32056652

432

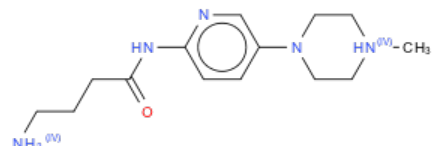

C31962444

433

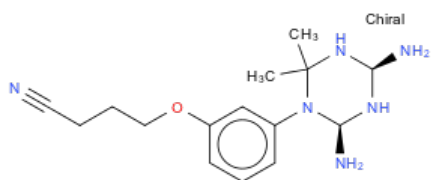

C17039879

434

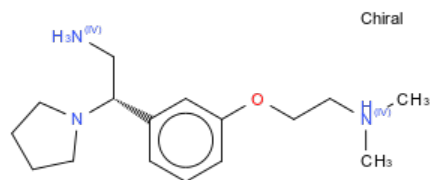

C32049479

435

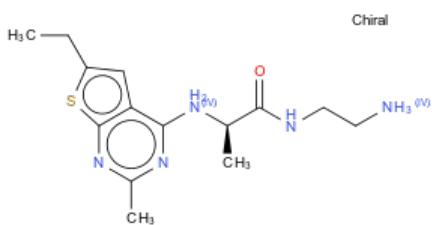

C31946525

436

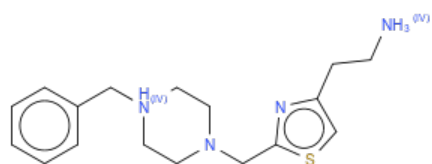

C19726728

437

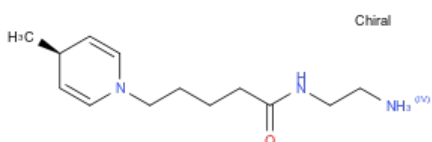

C31946147

438

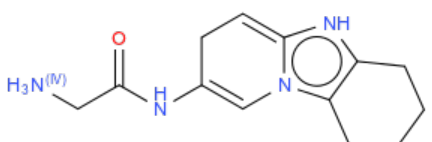

C31958919

439

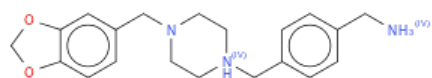

C31934061

440

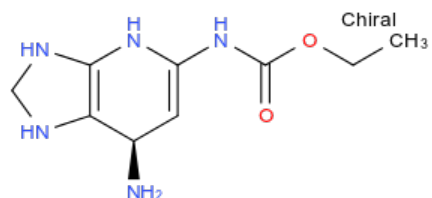

C17421764

441

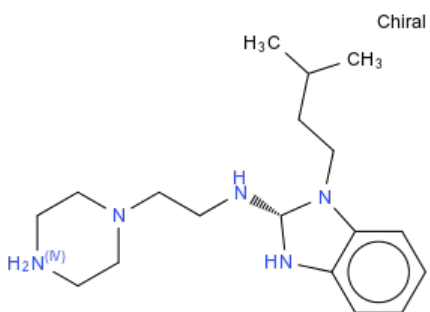

C22863901

442

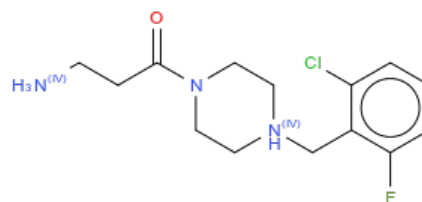

C19687990

443

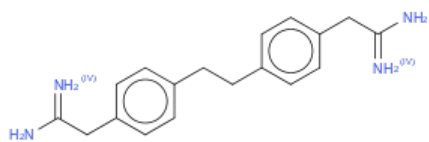

C01718360

444

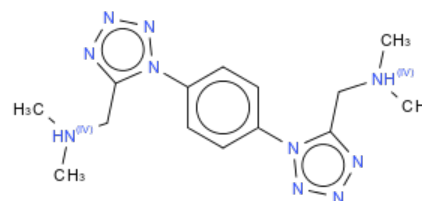

C04491708

445

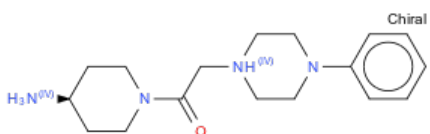

C32074019

446

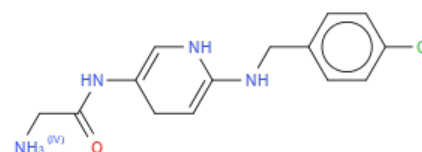

C31961548

447

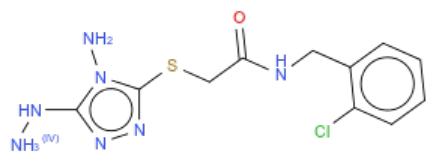

C21035463

448

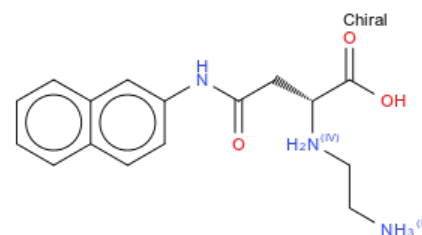

C39918461



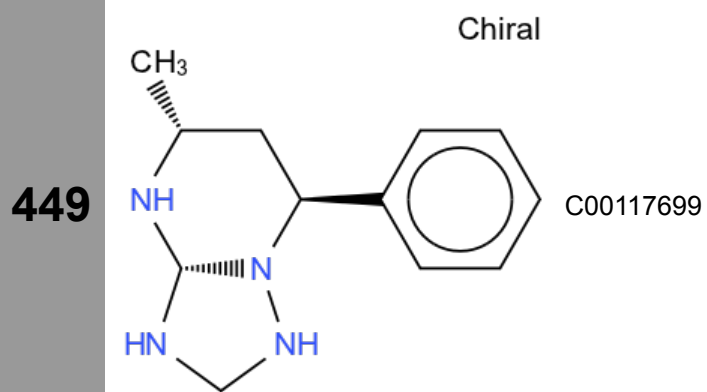**450**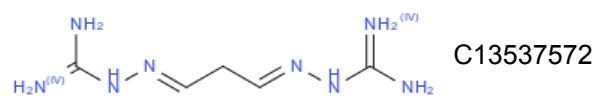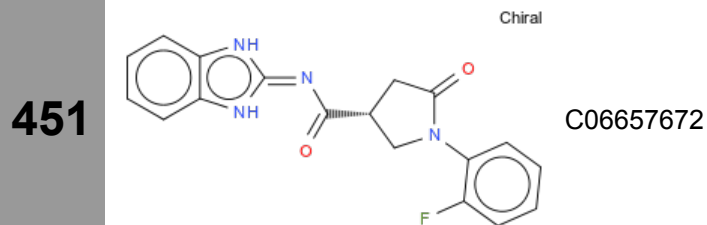**452**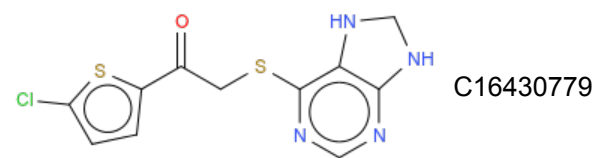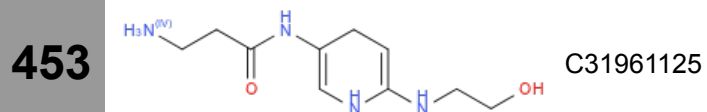**454**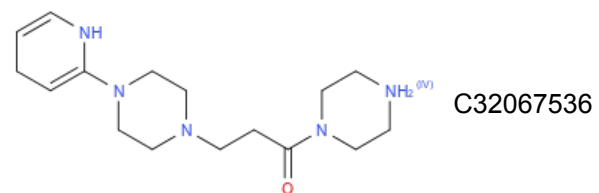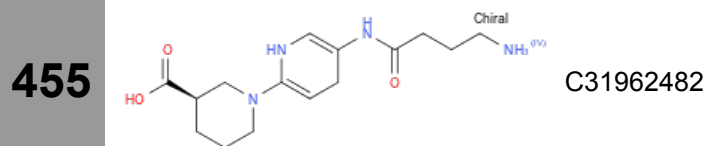**456**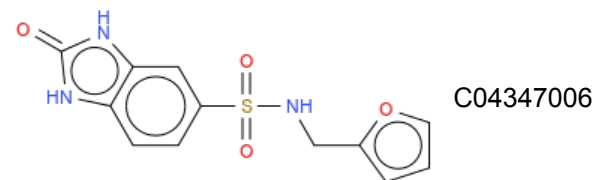

457

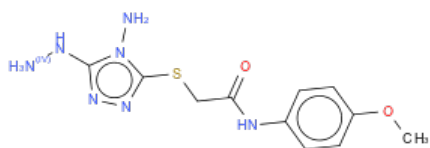

C21035197

458

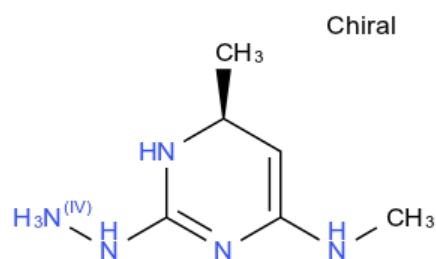

C00175409

459

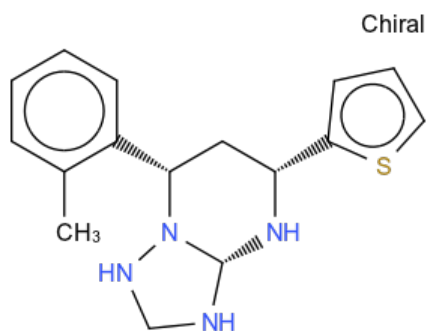

C00223012

460

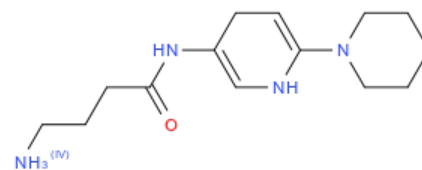

C31962628

461

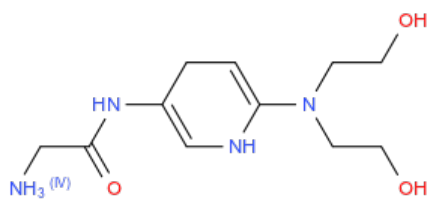

C31962802

462

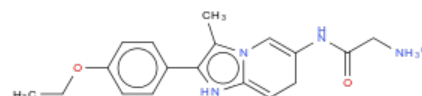

C31958866

463

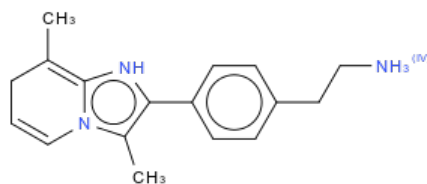

C19767750

464

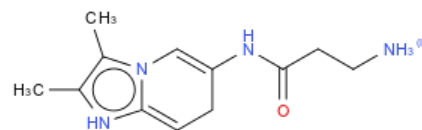

C31958801

465

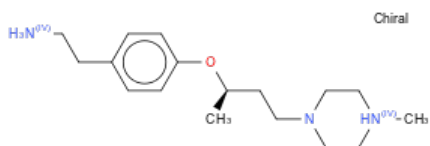

C31978093

466

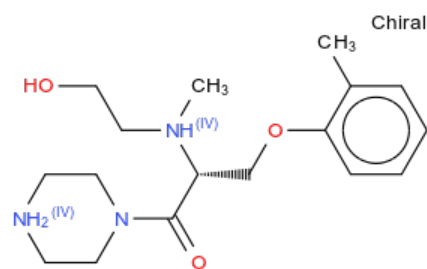

C32086104

467

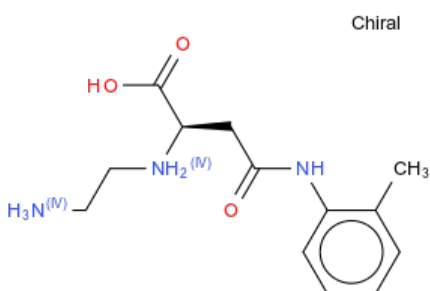

C39715041

468

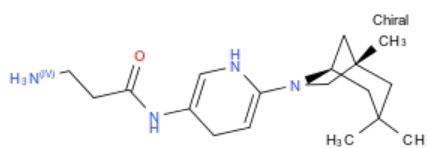

C31962755

469

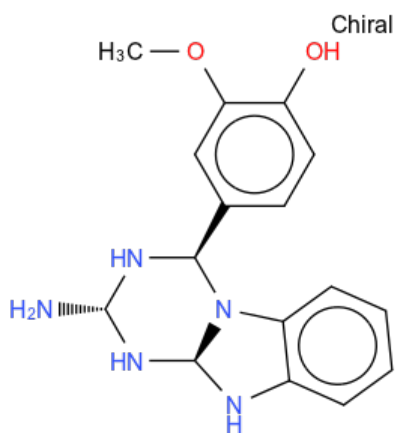

C05686993

470

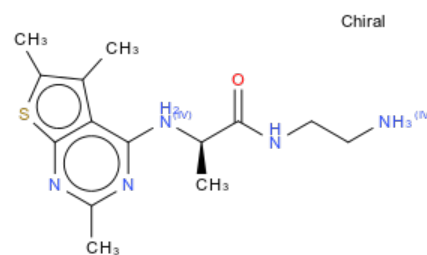

C31946517

471

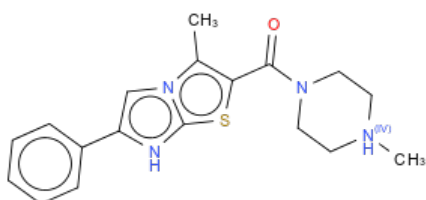

C16740393

472

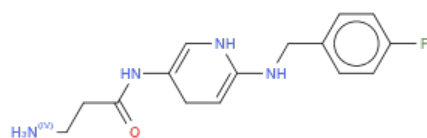

C31961208

473

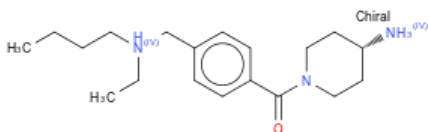

C33456662

474

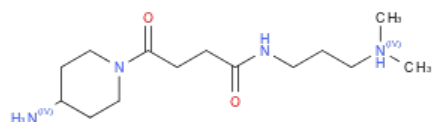

C33442541

475

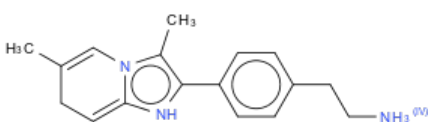

C19767748

476

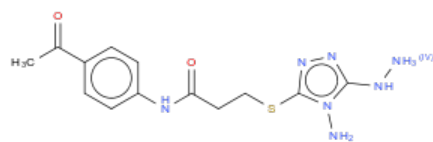

C20922287

477

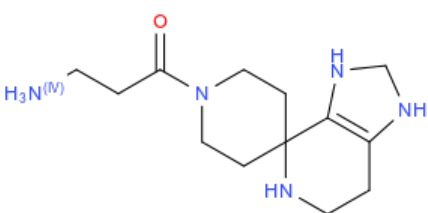

C26476609

478

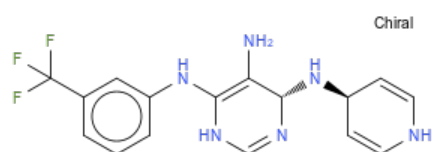

C40687597

479

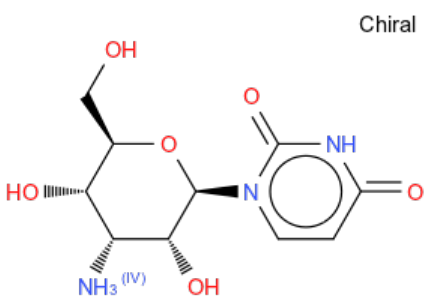

C01607323

480

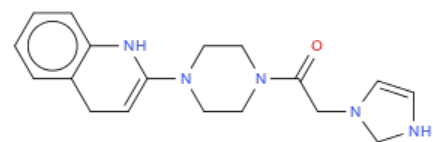

C22205182

481

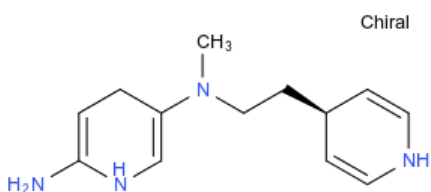

C19952590

482

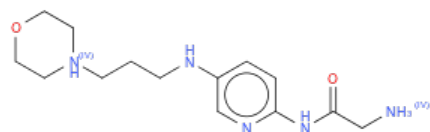

C31960329

483

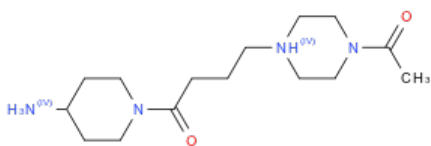

C32053462

484

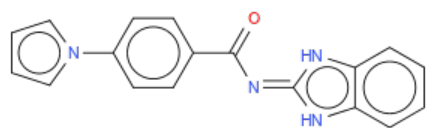

C17304169

485

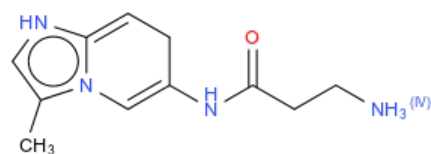

C31958775

486

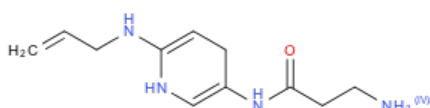

C31961172

487

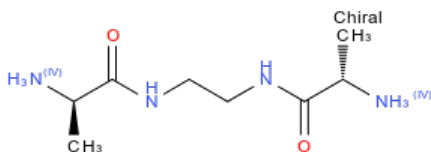

C08655598

488

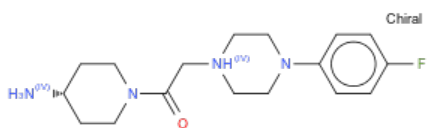

C32077314

489

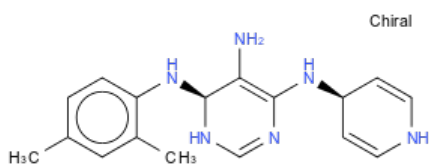

C40687556

490

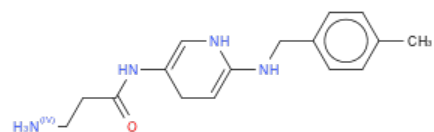

C31961210

491

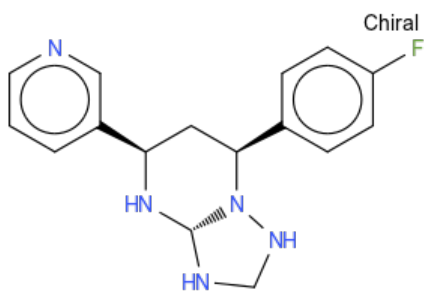

C00221756

492

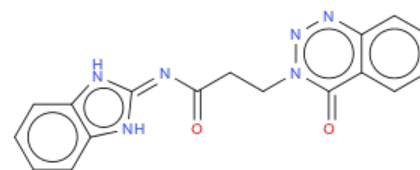

C05207781

493

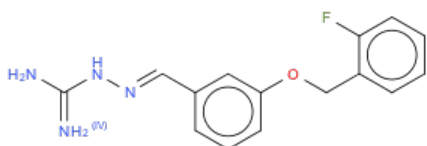

C41223735

494

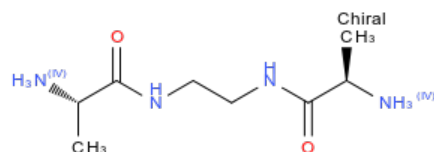

C17188217

495

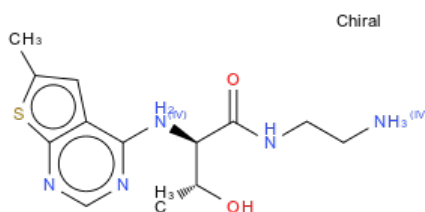

C31946508

496

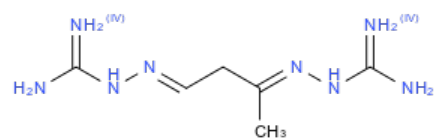

C17354312

497

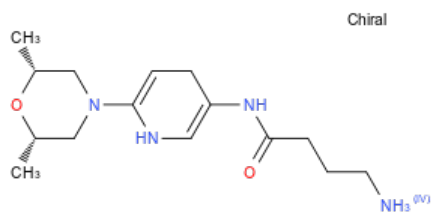

C31962586

498

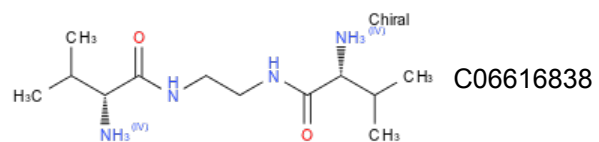

C06616838

499

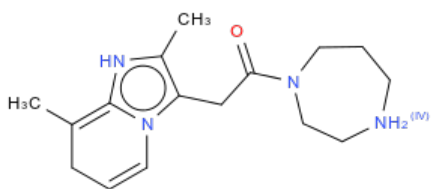

C41292566

500

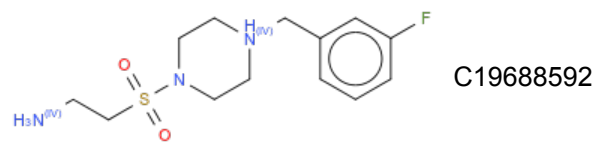

C19688592

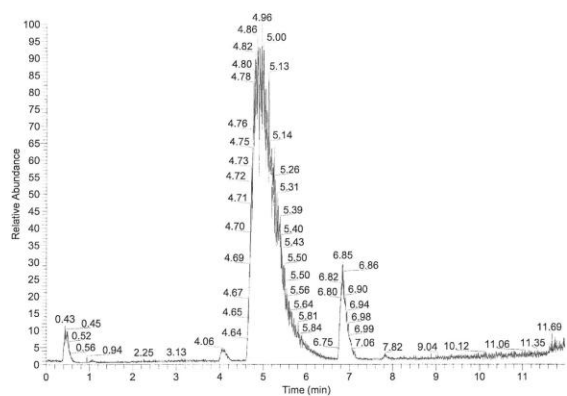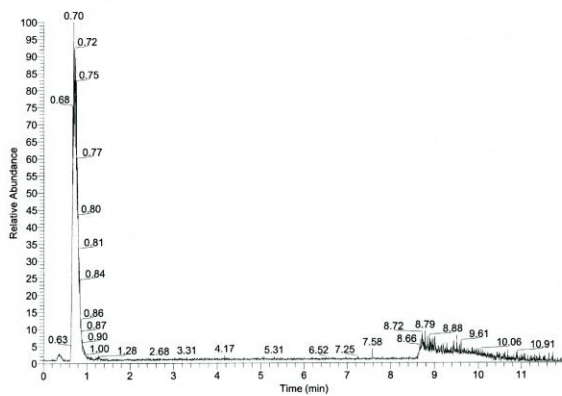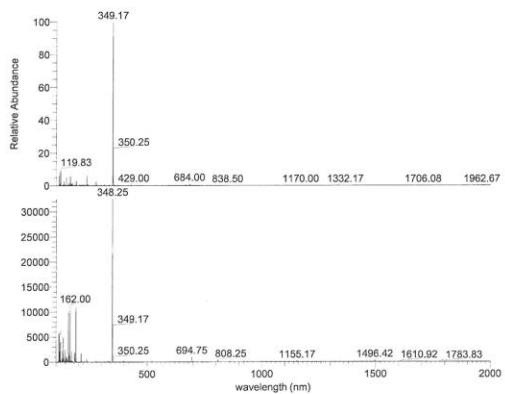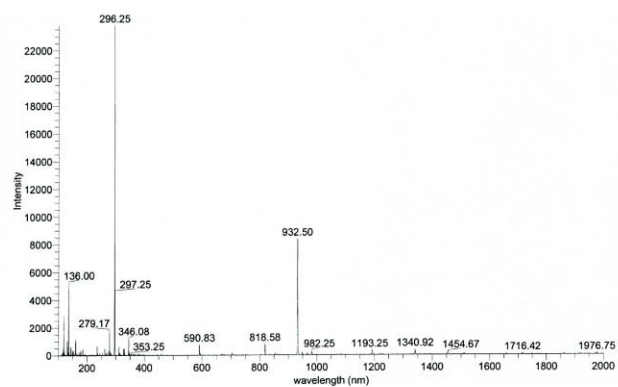

**A**

**B**

**Figure S1.** Liquid Chromatography/Mass Spectroscopy (LC/MS) analysis of the active compounds MSSM-1 and MSSM-2 (panel A and B, respectively).



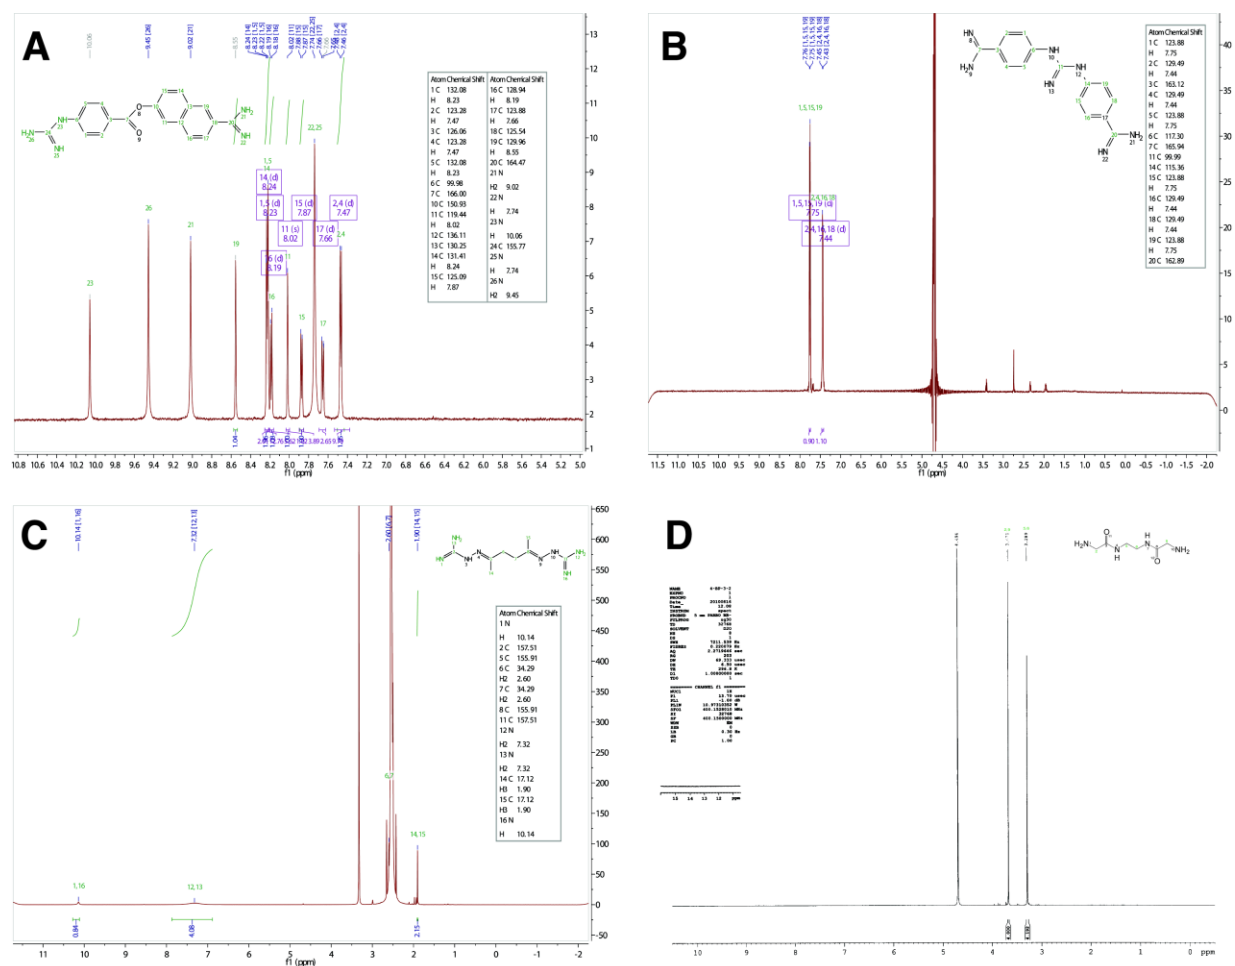

**Figure S2.** <sup>1</sup>H NMR analysis for each of the virtual screening hits, MSSM-1,2,3, and 5 (panel A, B, C and D, respectively).

```

read.table("database.ECFP4",sep=",") -> fingers
print(dim(fingers))
nst<-dim(fingers)[1]
cfinger<-as.matrix(fingers[,2:length(fingers[1,])])

read.table("subset-dataset.ECFP4",sep=",") -> selecfinger
print(dim(selecfinger))
nstselect<-dim(selecfinger)[1]
cselecfingerelec<-as.matrix(selecfinger[,2:length(selecfinger[1,])])

tanimotos<-matrix(NA,nrow=nstselect,ncol=nst)

for ( i in 1:nstselect){
  v1 <- cselecfingerelec[i,]
  print(i)
  norm1 <- v1 %*% v1
  for ( j in 1:nst){
    v2<- cfinger[j,]
    common <-v1 %*% v2
    norm2 <- v2 %*% v2
    tanimotos[i,j] <- common / (norm1+norm2 - common)
  }
}

mostsim<-NA*(1:6)
howsim<-NA*(1:6)

Nmostsim<-NA*(1:6)
Nhowsim<-NA*(1:6)

for ( i in 1:nstselect){
  mostsim[i]<-which.max(tanimotos[i,])
  howsim[i]<-max(tanimotos[i,])

  Nmostsim[i]<-order(tanimotos[i,],decreasing=TRUE)[2]
  Nhowsim[i]<-tanimotos[i,Nmostsim[i]]
}

cbind(1:6,mostsim,howsim, Nmostsim,Nhowsim)->results
colnames(results)<-c("Select","Best Mol.,""Best Tc","II Best. Mol.,""II
Best Tc")
results

```
